# Supplementary material for: Tetrabenzocircumpyrene: a nanographene fragment with an embedded peripentacene core
Source: Royal Society of Chemistry journal article supplement (doi:10.1039/c5cc00693g), 2015-01-01
Supplement: c5cc00693g1.pdf [file c5cc00693g1.pdf]

# Tetrabenzocircumpyrene: A Nanographene Fragment with an Embedded Peripentacene Core

## Electronic Supplementary Information

*Ruth Dorel,<sup>a</sup> Carlos Manzano,<sup>b</sup> We-Hyo Soe,<sup>b</sup> Maricarmen Grisolia,<sup>c</sup> Christian  
Joachim,<sup>c</sup> and Antonio M. Echavarren<sup>\*a,d</sup>*

<sup>a</sup> Institute of Chemical Research of Catalonia (ICIQ), Av. Països Catalans 16, 43007 Tarragona (Spain). E-mail:  
[aechavarren@iciq.es](mailto:aechavarren@iciq.es)

<sup>b</sup> IMRE, A\*STAR (Agency for Science, Technology and Research), 3 Research Link, 117602, Singapore.

<sup>c</sup> GNS & MANA Satellite,- CEMESNRS, 29 rue J. Marvig, 31055 Toulouse Cedex, France

<sup>d</sup> Departament de Química Analítica i Química Orgànica, Universitat Rovira i Virgili, C/ Marcel·li Domingo s/n, 43007  
Tarragona (Spain).

## Table of contents

|                                                                                                                    |      |
|--------------------------------------------------------------------------------------------------------------------|------|
| 1. Experimental details                                                                                            |      |
| 1.1. General Methods.....                                                                                          | S2   |
| 1.2. Optimization of the Synthesis of <b>4</b> .....                                                               | S3   |
| 1.3. Synthetic Procedures and Analytical Data.....                                                                 | S3   |
| 2. Crystal Data and Structure Refinement                                                                           |      |
| 2.1. Triphenylene-1,4-dione ( <b>4</b> ).....                                                                      | S10  |
| 2.2. 9,20-Di(naphthalen-1-yl)tetrabenz[ <i>a,c,j,l</i> ]tetracene ( <b>2a</b> ).....                               | S14  |
| 2.3. 9,20-Bis(4-hexylnaphthalen-1-yl)tetrabenz[ <i>a,c,j,l</i> ]tetracene ( <b>2b</b> ).....                       | S26  |
| 2.4. 9,20-Bis(4-dodecylnaphthalen-1-yl)tetrabenz[ <i>a,c,j,l</i> ]tetracene ( <b>2c</b> )....                      | S43  |
| 2.5. 9,20-Di(phenanthren-9-yl)tetrabenz[ <i>a,c,j,l</i> ]tetracene ( <b>2d</b> ).....                              | S60  |
| 2.6. 10,19-Dihexyltetrabenz[ <i>a,fg,ij,o</i> ]benzo[5,6]tetrapheno[8,9,10,11-<br>rst]pentaphene ( <b>8</b> )..... | S76  |
| 3. <sup>1</sup> H-NMR and <sup>13</sup> C-NMR Spectra.....                                                         | S90  |
| 4. Mass Spectra.....                                                                                               | S99  |
| 5. STM Studies and ESQC Calculations.....                                                                          | S102 |
| 6. Structures Optimized by DFT Calculations.....                                                                   | S104 |

## **1. Experimental Details**

### *1.1. General Methods*

Reactions under argon atmosphere were carried out in solvents dried by passing through an activated alumina column on a PureSolv™ solvent purification system (Innovative Technologies, Inc., MA).

Thin layer chromatography was carried out using TLC aluminum sheets coated with 0.2 mm of silica gel (Merck Gf234). Chromatographic purifications were carried out using flash grade silica gel (SDS Chromatogel 60 ACC, 40-60  $\mu\text{m}$ ).

NMR spectra were recorded at 25 °C on a Bruker Avance 300, 400 Ultrashield and Bruker Avance 500 Ultrashield apparatus, or at 125 °C on a Bruker Avance 500 Ultrashield apparatus. Solid State NMR spectra were recorded on a Bruker 400 AVANCE III WB spectrometer operating at  $^1\text{H}$  and  $^{13}\text{C}$  Larmor frequencies of 400 and 100.6MHz, respectively.  $^{13}\text{C}$ -CPMAS spectra were collected by using a 7mm MAS double resonance ( $^{13}\text{C}$ - $^1\text{H}$ ) probe at a spinning of 6KHz.

Mass spectra were recorded on a Waters LCT Premier Spectrometer (ESI and APCI) or on an Autoflex Broker Daltonics (MALDI and LDI).

Melting points were determined using a Büchi melting point apparatus.

Crystal structure determinations were carried out using a Bruker-Nonius diffractometer equipped with an APPEX 2 4K CCD area detector, a FR591 rotating anode with MoKa radiation, Montel mirrors as monochromator and a Kryoflex low temperature device ( $T = -173$  °C). Full-sphere data collection was used with  $w$  and  $j$  scans. Programs used: Data collection APEX-2, data reduction Bruker Saint V/.60A and absorption correction SADABS. Structure Solution and Refinement: Crystal structure solution was achieved using direct methods as implement in SHELXTL and visualized using the program XP. Missing atoms were subsequently located from difference Fourier synthesis and added to the atom list. Least-squares refinement on  $F^2$  using all measured intensities was carried out using the program SHELXTL. All non-hydrogen atoms were refined including anisotropic displacement parameters.

The molecules investigated by Scanning Tunneling Microscopy (STM) were sublimated on a Au(111) crystal surface which was previously cleaned using standard cleaning methods consisting of cycles of sputtering, using a beam of ionized Neon gas, and subsequent annealing. Evaporation parameters were adjusted to deposit minute amounts of molecules down to submonolayer coverages that are enough to result on the adsorption of single molecules on the substrate terraces. After preparation samples were cooled down and transferred to the STM chamber where they thermalized to temperatures down to about 7K, the base temperature of the LT-UHV-STM instrument used in all the experiments. The Elastic Scattering Quantum Chemistry (ESQC) calculated  $dI/dV$  STM images were calculated using a mono-electronic description of the tip apex – molecule – surface tunneling junction.

### 1.2. Optimization of the Synthesis of **4**

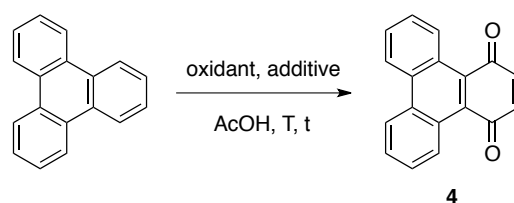

| Entry | Oxidant (eq.)                      | Additive (eq.)   | Scale (mmol) | t (h) | T (°C) | Yield (%) |
|-------|------------------------------------|------------------|--------------|-------|--------|-----------|
| 1     | H <sub>2</sub> O <sub>2</sub> (12) | none             | 14           | 1     | 110    | 6         |
| 2     | H <sub>2</sub> O <sub>2</sub> (12) | none             | 14           | 16    | 110    | 5         |
| 3     | H <sub>2</sub> O <sub>2</sub> (12) | none             | 70           | 2     | 110    | 1         |
| 4     | H <sub>2</sub> O <sub>2</sub> (36) | none             | 14           | 1     | 110    | 5         |
| 5     | CrO <sub>3</sub> (4)               | none             | 2            | 4     | 70     | 22        |
| 6     | CrO <sub>3</sub> (4)               | 18-crown-6 (0.1) | 2            | 4     | 70     | 39        |
| 7     | CrO <sub>3</sub> (8)               | 18-crown-6 (0.1) | 2            | 4     | 70     | 37        |
| 8     | CrO <sub>3</sub> (4)               | 18-crown-6 (0.1) | 2            | 16    | 70     | 37        |
| 9     | CrO <sub>3</sub> (4)               | 18-crown-6 (0.1) | 20           | 4     | 70     | 41        |

### 1.3. Synthetic Procedures and Analytical Data

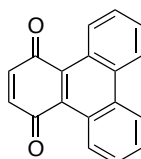

**Triphenylene-1,4-dione (4).** A suspension of triphenylene (2.28 g, 10.00 mmol) in AcOH (50 mL) was slowly added to a suspension of CrO<sub>3</sub> (4.00 g, 40.00 mmol) and 18-crown-6 (400 mg) in AcOH (150 mL) at 0 °C. Once the addition was complete the mixture was heated at 60 °C for 4 hours and then cooled down to room temperature, diluted with CH<sub>2</sub>Cl<sub>2</sub> (300 mL) and washed with water (3x200 mL) and saturated solution of NaHCO<sub>3</sub> (3x250 mL). The organic layer was dried over MgSO<sub>4</sub> and concentrated under reduced pressure. The product was obtained after purification by silica column eluted with a gradient of cyclohexane:CH<sub>2</sub>Cl<sub>2</sub> (4:1 to 1:1) as an orange solid (1.06 g, 4.01 mmol, yield = 41%). Melting point = 174-176 °C.

This reaction could be scaled up to obtain 5.0 grams of product.

$^1\text{H}$  NMR (400 MHz,  $\text{CDCl}_3$ )  $\delta$  9.28 (dd,  $J = 8.7, 1.3$  Hz, 2H), 8.71 (dd,  $J = 8.0, 1.2$  Hz, 2H), 7.87 – 7.70 (m, 4H), 6.96 (s, 2H).  $^{13}\text{C}$  NMR (101 MHz,  $\text{CDCl}_3$ )  $\delta$  188.7, 137.8, 133.3, 130.2, 129.5, 129.2, 128.5, 126.8, 122.7. HRMS (APCI+) Calcd. for  $\text{C}_{18}\text{H}_{11}\text{O}_2$   $[\text{M}+\text{H}]^+$ : 259.0754. Found: 259.0747.

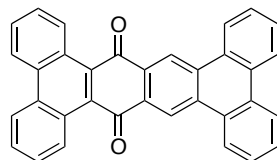

**Tetrabenzo[*a,c,j,l*]tetracene-9,20-dione (3).** **4** (2.69 g, 10.41 mmol), **6**<sup>1</sup> (5.69 g, 15.63 mmol) and KI (17.28 g, 104.10 mmol) were dissolved in DMF (300 mL) and the mixture was heated at 110 °C for 20 hours. After cooling down to room temperature, the precipitate was filtered off and washed with water (2x200 mL), acetone (2x200 mL) and  $\text{CH}_2\text{Cl}_2$  (2x200 mL) to afford the title compound mixed with variable amounts of partially reduced tetrabenzo[*a,c,j,l*]tetracene-9,20(10*H*,19*H*)-dione (**3'**) as an insoluble orange solid (3.33 g, 7.26 mmol, yield = 70%). Melting point > 300 °C.

$^1\text{H}$  NMR (500 MHz,  $\text{CDCl}_2\text{-CDCl}_2$ , 398 K)  $\delta$  8.99 (d,  $J = 8.3$  Hz, 2H), 8.91 (s, 2H), 8.34-8.29 (m, 2H), 8.18 (d,  $J = 8.0$  Hz, 2H), 8.13-8.07 (m, 2H), 7.28-7.17 (m, 8H). HRMS (LDI-) Calcd. for  $\text{C}_{34}\text{H}_{18}\text{O}_2$   $[\text{M}]^+$ : 458.1307. Found: 458.1300.

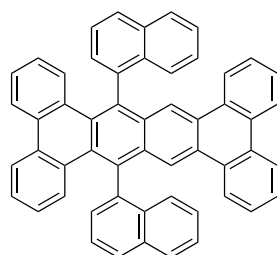

**9,20-Di(naphthalen-1-yl)tetrabenzo[*a,c,j,l*]tetracene (2a).** To a solution of 1-bromonaphthalene (677 mg, 3.3 mmol) in anhydrous  $\text{Et}_2\text{O}$  (20 mL) under Ar atmosphere at 0 °C, a solution of *n*-BuLi 2.5 M in hexanes (1.3 mL, 3.3 mmol) was added. After stirring at this temperature for 30 minutes this solution was transferred via cannula to a suspension of **3+3'** (500 mg,  $\approx 1.1$  mmol) in anhydrous toluene (20 mL) under Ar atmosphere and the resulting mixture was stirred at room temperature for 3 hours. The reaction was quenched by addition of saturated solution of  $\text{NH}_4\text{Cl}$  (30 mL), the organic phase was separated and the aqueous phase extracted with  $\text{CH}_2\text{Cl}_2$  (2x20 mL). The combined organic phases were dried over  $\text{MgSO}_4$  and the solvents evaporated to afford the crude mixture of **7syn**, **7anti**, **7'syn** and **7'anti**. This mixture was directly suspended in AcOH (60 mL) and then HI (57% wt. % in  $\text{H}_2\text{O}$ , 1

<sup>1</sup> 9,10-Bis(bromomethyl)phenanthrene is commercially available (CAS: 57743-47-2). However, it was more practical in terms of price to prepare it from 9,10-dimethylphenanthrene following the reported procedure: Kotha, S.; Krishna, N. G.; Misra, S.; Khedkar, P. *Synthesis* **2011**, 18, 2945-2950.

mL) was added. After stirring at 100 °C for 16 hours and cooling down to room temperature, saturated solution of Na<sub>2</sub>S<sub>2</sub>O<sub>3</sub> (25 mL) was added followed by extraction with CH<sub>2</sub>Cl<sub>2</sub> (3x60 mL). The combined organic phases were washed with saturated solution of NaHCO<sub>3</sub> (2x100 mL, CO<sub>2</sub> evolution), dried over MgSO<sub>4</sub>, filtered and concentrated under reduced pressure. The crude solid was dissolved in toluene (80 mL) and treated with DDQ (500 mg, 2.2 mmol) at 70 °C for 1 hour. After cooling down to room temperature, the mixture was diluted with EtOAc (50 mL) and washed with a solution of NaOH (10% wt., 3x60 mL) and water (3x60 mL). The organic phase was dried over MgSO<sub>4</sub> and the solvents removed under reduced pressure. Purification by silica column chromatography (gradient of cyclohexane:CH<sub>2</sub>Cl<sub>2</sub> 1:0 to 4:1) gave the title compound as an intense yellow solid (256.8 mg, 0.38 mmol, yield in 3 steps = 34%, mixture *syn:anti* ≈ 1:5). Melting point > 300 °C.

X-ray quality single crystals were obtained by layering a solution of polyarene in CHCl<sub>3</sub> with MeOH followed by addition of small amounts of CH<sub>2</sub>Cl<sub>2</sub> to redissolve the precipitate formed in the interface.

<sup>1</sup>H NMR (300 MHz, CDCl<sub>3</sub>) δ 8.79 (s, 0.4H) (*syn*), 8.63 (s, 2H) (*anti*), 8.51 – 8.38 (m, 2.4H) (*syn+anti*), 8.35 – 8.24 (m, 2.4H) (*syn+anti*), 8.22 – 8.08 (m, 4.8H) (*syn+anti*), 7.87 – 7.43 (m, 16.8H) (*syn+anti*), 7.41 – 7.23 (m, 7.2H) (*syn+anti*), 6.88 – 6.79 (m, 2.4H) (*syn+anti*). <sup>13</sup>C NMR (75 MHz, CDCl<sub>3</sub>) δ (*anti*) 140.1, 134.2, 134.1, 133.8, 131.9, 131.3, 130.9, 130.4, 130.1, 130.1, 129.9, 129.8, 128.8, 128.6, 127.8, 127.4, 127.4, 127.4, 127.2, 126.9, 126.6, 126.2, 126.2, 123.4, 123.4, 123.2, 122.1. HRMS (APCI+) Calcd. for C<sub>54</sub>H<sub>33</sub> [M+H]<sup>+</sup>: 681.2577. Found: 681.2573.

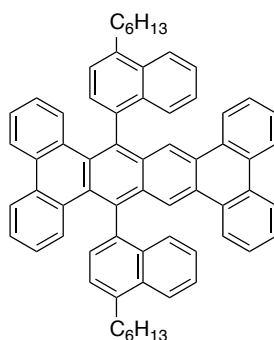

**9,20-Bis(4-hexylnaphthalen-1-yl)tetrabenzo[*a,c,j,l*]tetracene (2b).** Procedure described for **2a** starting from 1-bromo-4-hexylnaphthalene.<sup>2</sup> Yellow solid, yield in 3 steps = 32%, mixture *syn:anti* < 1:10. Melting point = 278-280 °C.

X-ray quality single crystals were obtained by layering a solution of polyarene in CHCl<sub>3</sub> with MeOH followed by addition of small amounts of CH<sub>2</sub>Cl<sub>2</sub> to redissolve the precipitate formed in the interface.

<sup>2</sup> 1-bromo-4-hexylnaphthalene and 1-bromo-4-dodecylnaphthalene were prepared according to: Cammidge, A. N.; Gopee, H. *Chem. Eur. J.* **2006**, *12*, 8609-8613.

$^1\text{H}$  NMR (300 MHz,  $\text{CDCl}_3$ )  $\delta$  8.61 (d,  $J = 1.8$  Hz, 2H), 8.45 – 8.39 (m, 2H), 8.39 – 8.27 (m, 4H), 7.74 (dd,  $J = 8.5, 1.4$  Hz, 2H), 7.72 – 7.59 (m, 4H), 7.61 – 7.44 (m, 8H), 7.36 – 7.23 (m, 6H), 6.81 (ddd,  $J = 8.4, 7.2, 1.4$  Hz, 2H), 3.42 – 3.30 (m, 4H), 2.01 (p,  $J = 7.2$  Hz, 4H), 1.68 – 1.39 (m, 12H), 0.99 (t,  $J = 6.9$  Hz, 6H).  $^{13}\text{C}$  NMR (75 MHz,  $\text{CDCl}_3$ )  $\delta$  139.5, 138.3, 134.5, 134.4, 132.3, 131.8, 131.5, 131.1, 130.3, 130.2, 130.0, 129.8, 129.5, 128.1, 127.6, 127.3, 127.3, 127.1, 126.7, 126.2, 126.1, 125.8, 124.7, 123.4, 123.3, 123.2, 122.2, 33.4, 31.9, 30.9, 29.5, 22.8, 14.2. HRMS (MALDI+) Calcd. for  $\text{C}_{66}\text{H}_{56}$   $[\text{M}]^+$ : 848.4382. Found: 848.4368.

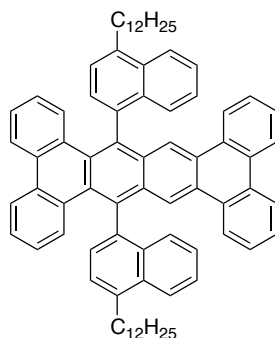

**9,20-Bis(4-dodecylphenyl)tetraphenyltetracene (2c).** Procedure described for **2a** starting from 1-bromo-4-dodecylphenyl. Orange solid, yield in 3 steps = 26%, mixture *syn:anti*  $\approx$  1:10. Melting point = 184-186  $^\circ\text{C}$ .

X-ray quality single crystals were obtained by layering a solution of polyarene in  $\text{CHCl}_3$  with MeOH followed by addition of small amounts of  $\text{CH}_2\text{Cl}_2$  to redissolve the precipitate formed in the interface.

$^1\text{H}$  NMR (500 MHz,  $\text{CDCl}_3$ )  $\delta$  8.78 (s, 0.3H) (*syn*), 8.62 (s, 2H) (*anti*), 8.46 (d,  $J = 7.7$  Hz, 0.3H) (*syn*), 8.43 (d,  $J = 7.4$  Hz, 2H) (*anti*), 8.36 (d,  $J = 8.6$  Hz, 2H) (*anti*), 8.31 (d,  $J = 6.8$  Hz, 2.3H) (*syn+anti*), 8.29 (d,  $J = 7.9$  Hz, 0.3H) (*syn*), 7.85 – 7.80 (m, 0.6H) (*syn*), 7.75 (dd,  $J = 8.6, 1.3$  Hz, 2H) (*anti*), 7.68 (dd,  $J = 8.4, 1.2$  Hz, 2H) (*anti*), 7.67 (d,  $J = 8.2$  Hz, 0.3H) (*syn*), 7.66 – 7.63 (m, 2H), 7.62 – 7.51 (m, 6.9H) (*syn+anti*), 7.48 (ddd,  $J = 8.2, 7.0, 1.2$  Hz, 2H) (*anti*), 7.38 – 7.23 (m, 7.2H) (*syn+anti*), 6.83 (ddd,  $J = 8.4, 7.0, 1.3$  Hz, 2.3H) (*syn+anti*), 3.43 – 3.29 (m, 4.6H) (*syn+anti*), 2.08 – 1.92 (m, 4.6H) (*syn+anti*), 1.65 – 1.55 (m, 4.6H) (*syn+anti*), 1.55 – 1.47 (m, 4.6H) (*syn+anti*), 1.45 – 1.26 (m, 32.2H) (*syn+anti*), 0.96 – 0.90 (m, 6.9H) (*syn+anti*).  $^{13}\text{C}$  NMR (126 MHz,  $\text{CDCl}_3$ ) (*anti*)  $\delta$  139.5, 138.3, 134.5, 134.4, 132.3, 131.8, 131.5, 131.1, 130.3, 130.2, 130.0, 129.8, 129.5, 128.1, 127.6, 127.3, 127.3, 127.1, 127.0, 126.6, 126.2, 126.1, 125.8, 124.7, 123.4, 123.3, 123.1, 122.2, 33.4, 32.0, 30.9, 29.8, 29.8, 29.8, 29.8, 29.8, 29.7, 29.4, 22.7, 14.1. HRMS (MALDI+) Calcd. for  $\text{C}_{78}\text{H}_{80}$   $[\text{M}]^+$ : 1016.6260. Found: 1016.6276.

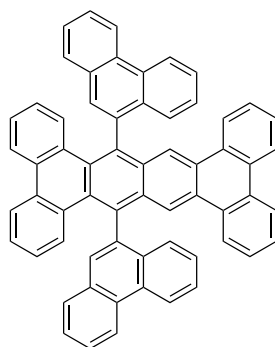

**9,20-Di(phenanthren-9-yl)tetrabenzocyclopenta[1,2-c]phenanthrene (2d).** Procedure described for **2a** starting from 9-bromophenanthrene. Orange solid, yield in 3 steps = 38%, mixture *syn:anti* < 1:10. Melting point = 269-271 °C.

X-ray quality single crystals were obtained by layering a solution of polyarene in  $\text{CHCl}_3$  with MeOH followed by addition of small amounts of  $\text{CH}_2\text{Cl}_2$  to redissolve the precipitate formed in the interface.

$^1\text{H}$  NMR (300 MHz,  $\text{CDCl}_3$ )  $\delta$  9.04 (d,  $J = 8.3$  Hz, 2H), 8.99 (d,  $J = 8.5$  Hz, 2H), 8.66 (s, 2H), 8.38 (dd,  $J = 8.3, 1.2$  Hz, 2H), 8.31 (dd,  $J = 8.2, 1.4$  Hz, 2H), 7.96 (s, 2H), 7.90 – 7.78 (m, 8H), 7.78 – 7.73 (m, 2H), 7.67 (dd,  $J = 7.6, 1.1$  Hz, 2H), 7.55 (dd,  $J = 8.4, 1.3$  Hz, 2H), 7.43 (ddt,  $J = 8.2, 6.9, 1.3$  Hz, 4H), 7.32 (ddd,  $J = 8.2, 7.1, 1.2$  Hz, 2H), 7.22 (ddd,  $J = 8.2, 7.0, 1.2$  Hz, 2H), 6.79 (ddd,  $J = 8.4, 7.1, 1.3$  Hz, 2H).  $^{13}\text{C}$  NMR (75 MHz,  $\text{CDCl}_3$ )  $\delta$  138.7, 134.1, 133.3, 132.5, 131.9, 131.2, 130.8, 130.8, 130.5, 130.5, 130.3, 130.0, 130.0, 129.2, 128.6, 127.8, 127.4, 127.4, 127.4, 127.2, 127.0, 126.9, 126.9, 126.9, 126.4, 123.5, 123.4, 123.4, 123.1, 122.8, 122.3. HRMS (APCI+) Calcd. for  $\text{C}_{62}\text{H}_{37}$   $[\text{M}+\text{H}]^+$ : 781.2890. Found: 781.2889.

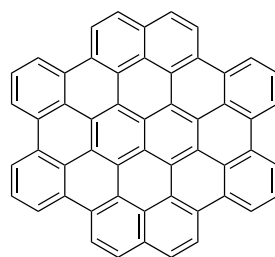

**Tetrabenzocircumpyrene (1a).**  $\text{FeCl}_3$  (305.6 mg, 1.884 mmol) was dissolved in  $\text{CH}_3\text{NO}_2$  (5 mL), the solution was degassed by bubbling Ar for 10 minutes and then transferred to a degassed solution of **2a** (70 mg, 0.105 mmol) in  $\text{CH}_2\text{Cl}_2$  (5 mL) at 0 °C. The resulting mixture was stirred at room temperature for 16 hours. Then the reaction was quenched by addition of 1 mL of MeOH and the suspended solid filtered off and washed by centrifuge with  $\text{H}_2\text{O}$  (3x10 mL), acetone (3x10mL), and  $\text{CH}_2\text{Cl}_2$  (5x10 mL). After a soxhlet extraction with benzene for 2 hours the product was obtained as a highly insoluble black solid (67.3 mg, 0.101 mmol, yield = 96%). Melting point > 300 °C.

This product could be obtained in up to 1-gram scale.



HRMS (LDI+) Calcd. for  $C_{54}H_{20}$   $[M]^+$ : 668.1560. Found: 668.1501.

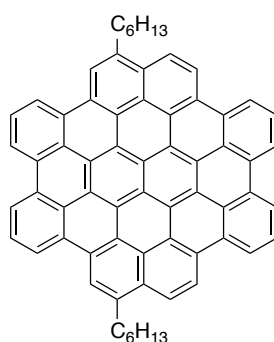

**Dihexyltetrabenzocircumpylene (1b).** Procedure described for **1a** starting from **2b**. Insoluble black solid, yield = 85%, melting point > 300 °C. HRMS (LDI+) Calcd. for  $C_{66}H_{44}$   $[M]^+$ : 836.3443. Found: 836.3411.

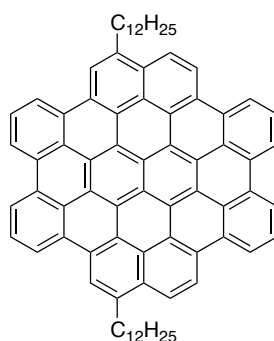

**Didodecyltetrabenzocircumpylene (1c).** Procedure described for **1a** starting from **2c**. Insoluble black solid, yield = 54%, melting point > 300 °C. HRMS (MALDI+) Calcd. for  $C_{78}H_{68}$   $[M]^+$ : 1004.5321. Found: 1004.5355.

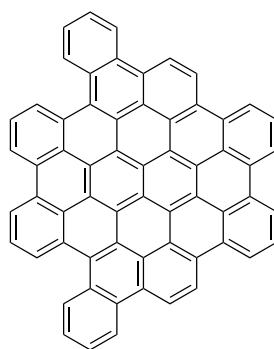

**Hexabenzocircumpylene (1d).** Procedure described for **1a** starting from **2d**. Insoluble black solid, yield = 64%, melting point > 300 °C. HRMS (MALDI+) Calcd. for  $C_{78}H_{68}$   $[M]^+$ : 768.1878. Found: 768.1884.

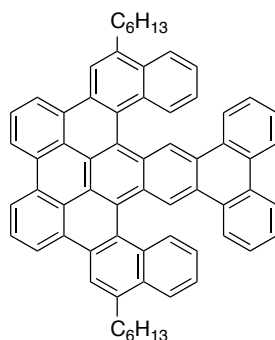

**10,19-Dihexyltetrabenzo[*a,fg,jj,o*]benzo[5,6]tetrapheno[8,9,10,11-*rst*]pentaphene (8).** Procedure described for **1a** starting from **2b**. The resulting mixture was diluted 40 times with CH<sub>2</sub>Cl<sub>2</sub>, filtered and washed with water (x3). The organic layer was separated, dried over MgSO<sub>4</sub> and the solvent evaporated. The crude mixture was then filtered through a pad of silica eluting with copious amounts of CH<sub>2</sub>Cl<sub>2</sub> (over 1 L every 0.1 mmol of starting material) due to the low solubility of the product. After evaporation of the solvent the title compound was obtained as a dark brown solid with poor solubility in standard organic solvents (yield = 17%). Melting point > 300 °C.

X-ray quality single crystals were obtained by heating a suspension of polyarene in (CDCl<sub>2</sub>)<sub>2</sub> over 100 °C followed by slow cooling down to room temperature.

<sup>1</sup>H NMR (500 MHz, CDCl<sub>2</sub>CDCl<sub>2</sub>, 398 K) δ 9.04 – 8.99 (m, 2H), 8.47 – 8.40 (m, 2H), 8.37 – 8.32 (m, 2H), 8.31 – 8.27 (m, 2H), 8.25 – 8.20 (m, 2H), 7.89 – 7.83 (m, 2H), 7.83 – 7.78 (m, 2H), 7.51 – 7.44 (m, 2H), 7.21 – 7.15 (m, 2H), 7.11 – 7.03 (m, 2H), 6.96 – 6.88 (m, 2H), 6.80 – 6.72 (m, 2H) + aliphatic protons. HRMS (MALDI+) Calcd. for C<sub>66</sub>H<sub>52</sub> [M]<sup>+</sup>: 844.4069. Found: 844.4059.

## 2. Crystal Data and Structure Refinement

### 2.1. Triphenylene-1,4-dione (4)

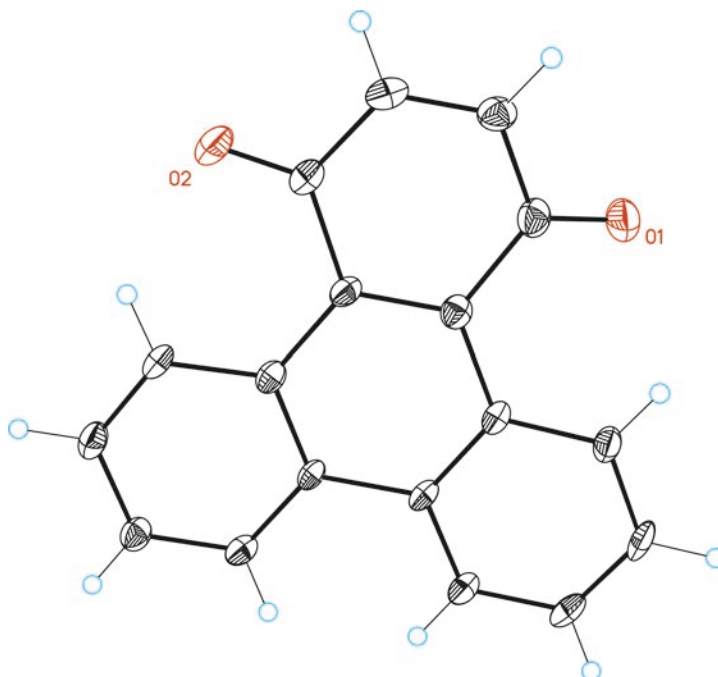

**Table 1.** Crystal data and structure refinement for **4**.

|                                 |                                                |              |
|---------------------------------|------------------------------------------------|--------------|
| Identification code             | mo_RD276_0m                                    |              |
| Empirical formula               | C <sub>18</sub> H <sub>10</sub> O <sub>2</sub> |              |
| Formula weight                  | 258.26                                         |              |
| Temperature                     | 100(2) K                                       |              |
| Wavelength                      | 0.71073 Å                                      |              |
| Crystal system                  | Orthorhombic                                   |              |
| Space group                     | P2(1)2(1)2(1)                                  |              |
| Unit cell dimensions            | a = 5.2561(11) Å                               | a = 90.00 °. |
|                                 | b = 9.121(2) Å                                 | b = 90.00 °. |
|                                 | c = 24.027(5) Å                                | g = 90.00 °. |
| Volume                          | 1151.8(4) Å <sup>3</sup>                       |              |
| Z                               | 4                                              |              |
| Density (calculated)            | 1.489 Mg/m <sup>3</sup>                        |              |
| Absorption coefficient          | 0.097 mm <sup>-1</sup>                         |              |
| F(000)                          | 536                                            |              |
| Crystal size                    | 0.30 x 0.15 x 0.05 mm <sup>3</sup>             |              |
| Theta range for data collection | 1.70 to 29.83 °.                               |              |
| Index ranges                    | -7 ≤ h ≤ 4, -12 ≤ k ≤ 12, -30 ≤ l ≤ 33         |              |
| Reflections collected           | 10774                                          |              |

|                                   |                                             |
|-----------------------------------|---------------------------------------------|
| Independent reflections           | 3051 [R(int) = 0.0616 ]                     |
| Completeness to theta =29.83 °    | 95.8%                                       |
| Absorption correction             | Empirical                                   |
| Max. and min. transmission        | 0.9952 and 0.9716                           |
| Refinement method                 | Full-matrix least-squares on F <sup>2</sup> |
| Data / restraints / parameters    | 3051 / 0 / 181                              |
| Goodness-of-fit on F <sup>2</sup> | 1.052                                       |
| Final R indices [I>2sigma(I)]     | R1 = 0.0555 , wR2 = 0.1338                  |
| R indices (all data)              | R1 = 0.0730 , wR2 = 0.1431                  |
| Flack parameter                   | x =2(2)                                     |
| Largest diff. peak and hole       | 0.266 and -0.320 e.Å <sup>-3</sup>          |

**Table 2.** Bond lengths [Å] and angles [°] for **4**.

---

Bond lengths----

|         |          |
|---------|----------|
| C1-C6   | 1.387(3) |
| C1-C18  | 1.442(3) |
| C1-C2   | 1.499(3) |
| C2-O1   | 1.228(3) |
| C2-C3   | 1.459(3) |
| C3-C4   | 1.329(3) |
| C4-C5   | 1.469(3) |
| C5-O2   | 1.219(3) |
| C5-C6   | 1.503(3) |
| C6-C7   | 1.454(3) |
| C7-C12  | 1.414(3) |
| C7-C8   | 1.419(3) |
| C8-C9   | 1.374(3) |
| C9-C10  | 1.397(3) |
| C10-C11 | 1.375(3) |
| C11-C12 | 1.409(3) |
| C12-C13 | 1.453(3) |
| C13-C14 | 1.405(3) |
| C13-C18 | 1.416(3) |
| C14-C15 | 1.368(3) |
| C15-C16 | 1.397(3) |
| C16-C17 | 1.375(3) |
| C17-C18 | 1.416(3) |

| Angles----- |            |
|-------------|------------|
| C6-C1-C18   | 121.03(18) |
| C6-C1-C2    | 118.43(19) |
| C18-C1-C2   | 120.40(18) |
| O1-C2-C3    | 119.2(2)   |
| O1-C2-C1    | 121.8(2)   |
| C3-C2-C1    | 118.80(19) |
| C4-C3-C2    | 119.8(2)   |
| C3-C4-C5    | 121.3(2)   |
| O2-C5-C4    | 117.5(2)   |
| O2-C5-C6    | 123.9(2)   |
| C4-C5-C6    | 118.5(2)   |
| C1-C6-C7    | 120.18(19) |
| C1-C6-C5    | 118.36(19) |
| C7-C6-C5    | 121.45(18) |
| C12-C7-C8   | 118.36(19) |
| C12-C7-C6   | 119.27(18) |
| C8-C7-C6    | 122.4(2)   |
| C9-C8-C7    | 121.1(2)   |
| C8-C9-C10   | 120.5(2)   |
| C11-C10-C9  | 119.5(2)   |
| C10-C11-C12 | 121.52(19) |
| C11-C12-C7  | 119.02(18) |
| C11-C12-C13 | 120.87(19) |
| C7-C12-C13  | 120.07(18) |
| C14-C13-C18 | 118.69(18) |
| C14-C13-C12 | 121.63(19) |
| C18-C13-C12 | 119.67(18) |
| C15-C14-C13 | 121.5(2)   |
| C14-C15-C16 | 120.0(2)   |
| C17-C16-C15 | 120.0(2)   |
| C16-C17-C18 | 120.9(2)   |
| C17-C18-C13 | 118.56(18) |
| C17-C18-C1  | 122.13(19) |
| C13-C18-C1  | 119.31(18) |

-----  
**Table 3.** Torsion angles [°] for **4**.

---

|                 |             |
|-----------------|-------------|
| C6-C1-C2-O1     | -153.3(2)   |
| C18-C1-C2-O1    | 22.4(3)     |
| C6-C1-C2-C3     | 21.6(3)     |
| C18-C1-C2-C3    | -162.6(2)   |
| O1-C2-C3-C4     | 155.2(2)    |
| C1-C2-C3-C4     | -19.9(3)    |
| C2-C3-C4-C5     | 1.6(3)      |
| C3-C4-C5-O2     | -164.5(2)   |
| C3-C4-C5-C6     | 14.8(3)     |
| C18-C1-C6-C7    | -2.4(3)     |
| C2-C1-C6-C7     | 173.29(18)  |
| C18-C1-C6-C5    | 178.90(18)  |
| C2-C1-C6-C5     | -5.4(3)     |
| O2-C5-C6-C1     | 166.8(2)    |
| C4-C5-C6-C1     | -12.3(3)    |
| O2-C5-C6-C7     | -11.8(3)    |
| C4-C5-C6-C7     | 169.03(18)  |
| C1-C6-C7-C12    | -3.4(3)     |
| C5-C6-C7-C12    | 175.17(19)  |
| C1-C6-C7-C8     | 177.2(2)    |
| C5-C6-C7-C8     | -4.2(3)     |
| C12-C7-C8-C9    | -1.6(3)     |
| C6-C7-C8-C9     | 177.8(2)    |
| C7-C8-C9-C10    | 0.6(3)      |
| C8-C9-C10-C11   | 0.4(3)      |
| C9-C10-C11-C12  | -0.4(3)     |
| C10-C11-C12-C7  | -0.7(3)     |
| C10-C11-C12-C13 | 177.13(19)  |
| C8-C7-C12-C11   | 1.6(3)      |
| C6-C7-C12-C11   | -177.76(18) |
| C8-C7-C12-C13   | -176.18(18) |
| C6-C7-C12-C13   | 4.4(3)      |
| C11-C12-C13-C14 | 1.6(3)      |
| C7-C12-C13-C14  | 179.33(18)  |
| C11-C12-C13-C18 | -177.35(19) |
| C7-C12-C13-C18  | 0.4(3)      |
| C18-C13-C14-C15 | 2.8(3)      |

|                 |             |
|-----------------|-------------|
| C12-C13-C14-C15 | -176.13(19) |
| C13-C14-C15-C16 | 2.0(3)      |
| C14-C15-C16-C17 | -3.7(3)     |
| C15-C16-C17-C18 | 0.4(3)      |
| C16-C17-C18-C13 | 4.3(3)      |
| C16-C17-C18-C1  | -176.38(19) |
| C14-C13-C18-C17 | -5.9(3)     |
| C12-C13-C18-C17 | 173.08(19)  |
| C14-C13-C18-C1  | 174.84(19)  |
| C12-C13-C18-C1  | -6.2(3)     |
| C6-C1-C18-C17   | -172.0(2)   |
| C2-C1-C18-C17   | 12.4(3)     |
| C6-C1-C18-C13   | 7.3(3)      |
| C2-C1-C18-C13   | -168.33(18) |

-----

2.2. 9,20-Di(naphthalen-1-yl)tetrabenzo[*a,c,j,l*]tetracene (**2a**)

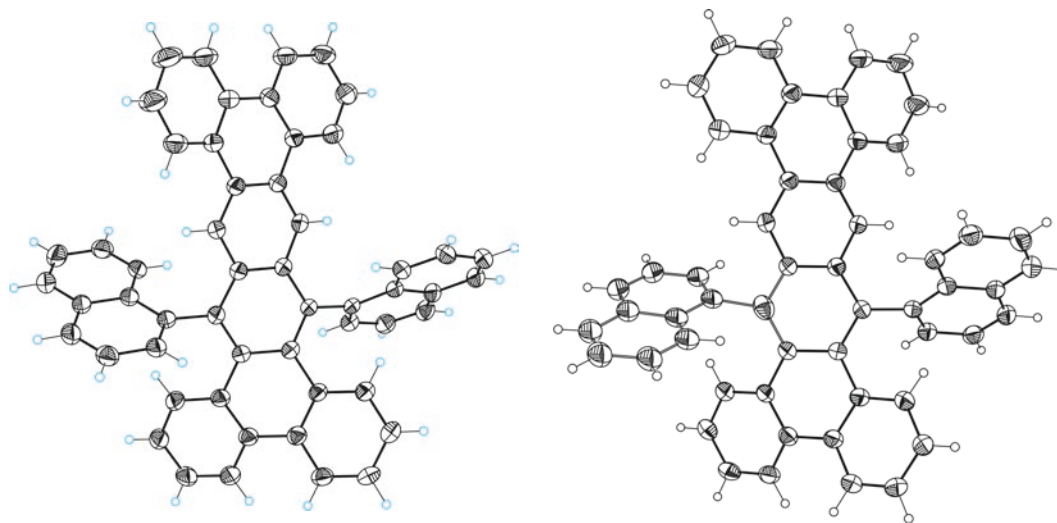

**Table 4.** Crystal data and structure refinement for **2a**.

|                     |                                 |
|---------------------|---------------------------------|
| Identification code | RD294P21c                       |
| Empirical formula   | C <sub>54</sub> H <sub>32</sub> |
| Formula weight      | 680.80                          |
| Temperature         | 100(2) K                        |
| Wavelength          | 0.71073 Å                       |
| Crystal system      | Monoclinic                      |

|                                   |                                             |               |
|-----------------------------------|---------------------------------------------|---------------|
| Space group                       | P2(1)/c                                     |               |
| Unit cell dimensions              | a = 9.2045(10) Å                            | a = 90.00 °.  |
|                                   | b = 16.8399(17) Å                           | b = 90.064(4) |
|                                   |                                             | °.            |
|                                   | c = 22.397(2) Å                             | g = 90.00 °.  |
| Volume                            | 3471.6(6) Å <sup>3</sup>                    |               |
| Z                                 | 4                                           |               |
| Density (calculated)              | 1.303 Mg/m <sup>3</sup>                     |               |
| Absorption coefficient            | 0.074 mm <sup>-1</sup>                      |               |
| F(000)                            | 1424                                        |               |
| Crystal size                      | 0.20 x 0.08 x 0.08 mm <sup>3</sup>          |               |
| Theta range for data collection   | 1.51 to 32.13 °.                            |               |
| Index ranges                      | -11 <=h<=13 , -25 <=k<=16 , -18 <=l<=32     |               |
| Reflections collected             | 30518                                       |               |
| Independent reflections           | 10289 [R(int) = 0.0624 ]                    |               |
| Completeness to theta =32.13 °    | 84.3%                                       |               |
| Absorption correction             | Empirical                                   |               |
| Max. and min. transmission        | 0.9941 and 0.9854                           |               |
| Refinement method                 | Full-matrix least-squares on F <sup>2</sup> |               |
| Data / restraints / parameters    | 10289 / 225 / 586                           |               |
| Goodness-of-fit on F <sup>2</sup> | 1.060                                       |               |
| Final R indices [I>2sigma(I)]     | R1 = 0.0887 , wR2 = 0.1815                  |               |
| R indices (all data)              | R1 = 0.1572 , wR2 = 0.2101                  |               |
| Largest diff. peak and hole       | 0.367 and -0.215 e.Å <sup>-3</sup>          |               |

**Table 5.** Bond lengths [Å] and angles [°] for **2a**.

---

|                  |          |
|------------------|----------|
| Bond lengths---- |          |
| C1-C2            | 1.395(3) |
| C1-C34           | 1.428(3) |
| C1-C35           | 1.500(3) |
| C2-C15           | 1.447(3) |
| C2-C3            | 1.484(3) |
| C3-C4            | 1.407(3) |
| C3-C8            | 1.411(3) |
| C4-C5            | 1.379(3) |
| C5-C6            | 1.390(3) |
| C6-C7            | 1.375(4) |



|           |          |
|-----------|----------|
| C7-C8     | 1.411(3) |
| C8-C9     | 1.468(3) |
| C9-C10    | 1.400(3) |
| C9-C14    | 1.404(3) |
| C10-C11   | 1.374(3) |
| C11-C12   | 1.395(4) |
| C12-C13   | 1.375(3) |
| C13-C14   | 1.411(3) |
| C14-C15   | 1.474(3) |
| C15-C16   | 1.393(4) |
| C15-C16'  | 1.416(8) |
| C16-C17   | 1.436(4) |
| C16-C45   | 1.506(4) |
| C16'-C17  | 1.411(9) |
| C16'-C45' | 1.531(9) |
| C17-C18   | 1.405(3) |
| C17-C34   | 1.427(3) |
| C18-C19   | 1.386(3) |
| C19-C32   | 1.433(3) |
| C19-C20   | 1.468(3) |
| C20-C21   | 1.405(3) |
| C20-C25   | 1.412(3) |
| C21-C22   | 1.359(4) |
| C22-C23   | 1.386(4) |
| C23-C24   | 1.382(4) |
| C24-C25   | 1.392(4) |
| C25-C26   | 1.471(3) |
| C26-C31   | 1.407(4) |
| C26-C27   | 1.408(4) |
| C27-C28   | 1.378(4) |
| C28-C29   | 1.366(4) |
| C29-C30   | 1.379(4) |
| C30-C31   | 1.407(4) |
| C31-C32   | 1.466(3) |
| C32-C33   | 1.375(3) |
| C33-C34   | 1.414(3) |
| C35-C36   | 1.375(4) |
| C35-C44   | 1.427(3) |

|           |          |
|-----------|----------|
| C36-C37   | 1.411(3) |
| C37-C38   | 1.362(4) |
| C38-C39   | 1.409(4) |
| C39-C40   | 1.417(4) |
| C39-C44   | 1.437(3) |
| C40-C41   | 1.348(4) |
| C41-C42   | 1.408(4) |
| C42-C43   | 1.364(3) |
| C43-C44   | 1.425(4) |
| C45-C46   | 1.372(4) |
| C45-C54   | 1.437(4) |
| C46-C47   | 1.404(5) |
| C47-C48   | 1.363(5) |
| C48-C49   | 1.425(5) |
| C49-C50   | 1.412(4) |
| C49-C54   | 1.436(4) |
| C50-C51   | 1.367(5) |
| C51-C52   | 1.411(5) |
| C52-C53   | 1.374(4) |
| C53-C54   | 1.413(4) |
| C45'-C46' | 1.372(6) |
| C45'-C54' | 1.435(5) |
| C46'-C47' | 1.402(6) |
| C47'-C48' | 1.366(7) |
| C48'-C49' | 1.426(7) |
| C49'-C50' | 1.412(6) |
| C49'-C54' | 1.438(5) |
| C50'-C51' | 1.367(6) |
| C51'-C52' | 1.410(6) |
| C52'-C53' | 1.373(6) |
| C53'-C54' | 1.412(6) |

Angles-----

|            |            |
|------------|------------|
| C2-C1-C34  | 119.0(2)   |
| C2-C1-C35  | 121.2(2)   |
| C34-C1-C35 | 119.61(19) |
| C1-C2-C15  | 118.9(2)   |
| C1-C2-C3   | 124.5(2)   |

|               |            |
|---------------|------------|
| C15-C2-C3     | 116.31(19) |
| C4-C3-C8      | 117.6(2)   |
| C4-C3-C2      | 122.3(2)   |
| C8-C3-C2      | 119.5(2)   |
| C5-C4-C3      | 121.7(2)   |
| C4-C5-C6      | 120.4(2)   |
| C7-C6-C5      | 119.4(2)   |
| C6-C7-C8      | 121.2(2)   |
| C7-C8-C3      | 119.7(2)   |
| C7-C8-C9      | 120.7(2)   |
| C3-C8-C9      | 119.6(2)   |
| C10-C9-C14    | 119.8(2)   |
| C10-C9-C8     | 121.7(2)   |
| C14-C9-C8     | 118.5(2)   |
| C11-C10-C9    | 121.3(2)   |
| C10-C11-C12   | 119.4(2)   |
| C13-C12-C11   | 120.1(2)   |
| C12-C13-C14   | 121.3(2)   |
| C9-C14-C13    | 118.0(2)   |
| C9-C14-C15    | 120.2(2)   |
| C13-C14-C15   | 121.4(2)   |
| C16-C15-C16'  | 16.0(12)   |
| C16-C15-C2    | 119.1(2)   |
| C16'-C15-C2   | 119.5(4)   |
| C16-C15-C14   | 124.1(2)   |
| C16'-C15-C14  | 120.7(5)   |
| C2-C15-C14    | 116.8(2)   |
| C15-C16-C17   | 118.2(3)   |
| C15-C16-C45   | 118.9(3)   |
| C17-C16-C45   | 122.9(3)   |
| C17-C16'-C15  | 118.3(7)   |
| C17-C16'-C45' | 112.0(7)   |
| C15-C16'-C45' | 128.5(8)   |
| C18-C17-C16'  | 123.6(4)   |
| C18-C17-C34   | 117.9(2)   |
| C16'-C17-C34  | 115.9(6)   |
| C18-C17-C16   | 122.5(2)   |
| C16'-C17-C16  | 15.8(12)   |

|             |          |
|-------------|----------|
| C34-C17-C16 | 119.6(2) |
| C19-C18-C17 | 122.8(2) |
| C18-C19-C32 | 118.6(2) |
| C18-C19-C20 | 122.4(2) |
| C32-C19-C20 | 119.0(2) |
| C21-C20-C25 | 118.0(2) |
| C21-C20-C19 | 121.5(2) |
| C25-C20-C19 | 120.5(2) |
| C22-C21-C20 | 121.8(2) |
| C21-C22-C23 | 120.5(3) |
| C24-C23-C22 | 118.9(3) |
| C23-C24-C25 | 121.9(2) |
| C24-C25-C20 | 118.8(2) |
| C24-C25-C26 | 121.3(2) |
| C20-C25-C26 | 119.8(2) |
| C31-C26-C27 | 118.3(2) |
| C31-C26-C25 | 120.1(2) |
| C27-C26-C25 | 121.6(2) |
| C28-C27-C26 | 121.5(3) |
| C29-C28-C27 | 120.0(3) |
| C28-C29-C30 | 120.2(3) |
| C29-C30-C31 | 121.2(3) |
| C30-C31-C26 | 118.6(2) |
| C30-C31-C32 | 121.4(2) |
| C26-C31-C32 | 119.9(2) |
| C33-C32-C19 | 118.7(2) |
| C33-C32-C31 | 121.5(2) |
| C19-C32-C31 | 119.8(2) |
| C32-C33-C34 | 122.7(2) |
| C33-C34-C17 | 118.2(2) |
| C33-C34-C1  | 122.1(2) |
| C17-C34-C1  | 119.6(2) |
| C36-C35-C44 | 119.6(2) |
| C36-C35-C1  | 118.6(2) |
| C44-C35-C1  | 121.8(2) |
| C35-C36-C37 | 121.4(2) |
| C38-C37-C36 | 119.9(3) |
| C37-C38-C39 | 121.1(2) |

|                |           |
|----------------|-----------|
| C38-C39-C40    | 122.1(2)  |
| C38-C39-C44    | 119.3(2)  |
| C40-C39-C44    | 118.6(2)  |
| C41-C40-C39    | 121.5(2)  |
| C40-C41-C42    | 120.2(3)  |
| C43-C42-C41    | 120.9(3)  |
| C42-C43-C44    | 120.5(2)  |
| C43-C44-C35    | 123.2(2)  |
| C43-C44-C39    | 118.2(2)  |
| C35-C44-C39    | 118.6(2)  |
| C46-C45-C54    | 118.8(3)  |
| C46-C45-C16    | 117.2(3)  |
| C54-C45-C16    | 124.0(3)  |
| C45-C46-C47    | 122.9(3)  |
| C48-C47-C46    | 119.5(3)  |
| C47-C48-C49    | 120.9(3)  |
| C50-C49-C48    | 121.5(3)  |
| C50-C49-C54    | 119.2(4)  |
| C48-C49-C54    | 119.3(3)  |
| C51-C50-C49    | 120.7(3)  |
| C50-C51-C52    | 120.2(3)  |
| C53-C52-C51    | 120.7(3)  |
| C52-C53-C54    | 120.6(3)  |
| C53-C54-C49    | 118.5(3)  |
| C53-C54-C45    | 122.8(3)  |
| C49-C54-C45    | 118.6(3)  |
| C46'-C45'-C54' | 118.7(6)  |
| C46'-C45'-C16' | 120.2(11) |
| C54'-C45'-C16' | 120.9(11) |
| C45'-C46'-C47' | 123.1(7)  |
| C48'-C47'-C46' | 119.6(7)  |
| C47'-C48'-C49' | 120.4(6)  |
| C50'-C49'-C48' | 121.2(6)  |
| C50'-C49'-C54' | 119.0(6)  |
| C48'-C49'-C54' | 119.5(6)  |
| C51'-C50'-C49' | 120.7(6)  |
| C50'-C51'-C52' | 120.2(6)  |
| C53'-C52'-C51' | 120.6(7)  |

|                |          |
|----------------|----------|
| C52'-C53'-C54' | 120.7(6) |
| C53'-C54'-C45' | 123.0(6) |
| C53'-C54'-C49' | 118.3(6) |
| C45'-C54'-C49' | 118.5(5) |

-----  
**Table 6.** Torsion angles [°] for **2a**.

---

|                 |           |
|-----------------|-----------|
| C34-C1-C2-C15   | 10.9(3)   |
| C35-C1-C2-C15   | -164.5(2) |
| C34-C1-C2-C3    | -163.1(2) |
| C35-C1-C2-C3    | 21.5(4)   |
| C1-C2-C3-C4     | 21.1(4)   |
| C15-C2-C3-C4    | -153.1(2) |
| C1-C2-C3-C8     | -167.8(2) |
| C15-C2-C3-C8    | 18.1(3)   |
| C8-C3-C4-C5     | -0.8(4)   |
| C2-C3-C4-C5     | 170.6(2)  |
| C3-C4-C5-C6     | 0.5(4)    |
| C4-C5-C6-C7     | 0.2(4)    |
| C5-C6-C7-C8     | -0.7(4)   |
| C6-C7-C8-C3     | 0.4(4)    |
| C6-C7-C8-C9     | -179.4(2) |
| C4-C3-C8-C7     | 0.3(4)    |
| C2-C3-C8-C7     | -171.3(2) |
| C4-C3-C8-C9     | -179.9(2) |
| C2-C3-C8-C9     | 8.5(3)    |
| C7-C8-C9-C10    | -22.2(4)  |
| C3-C8-C9-C10    | 158.0(2)  |
| C7-C8-C9-C14    | 159.6(2)  |
| C3-C8-C9-C14    | -20.2(3)  |
| C14-C9-C10-C11  | -0.7(4)   |
| C8-C9-C10-C11   | -178.9(2) |
| C9-C10-C11-C12  | 1.0(4)    |
| C10-C11-C12-C13 | 0.5(4)    |
| C11-C12-C13-C14 | -2.4(4)   |
| C10-C9-C14-C13  | -1.2(3)   |
| C8-C9-C14-C13   | 177.1(2)  |
| C10-C9-C14-C15  | -173.5(2) |

|                   |            |
|-------------------|------------|
| C8-C9-C14-C15     | 4.7(3)     |
| C12-C13-C14-C9    | 2.8(4)     |
| C12-C13-C14-C15   | 175.0(2)   |
| C1-C2-C15-C16     | -26.4(4)   |
| C3-C2-C15-C16     | 148.0(4)   |
| C1-C2-C15-C16'    | -8.0(12)   |
| C3-C2-C15-C16'    | 166.4(12)  |
| C1-C2-C15-C14     | 152.7(2)   |
| C3-C2-C15-C14     | -32.9(3)   |
| C9-C14-C15-C16    | -159.0(4)  |
| C13-C14-C15-C16   | 28.9(5)    |
| C9-C14-C15-C16'   | -177.6(12) |
| C13-C14-C15-C16'  | 10.3(12)   |
| C9-C14-C15-C2     | 21.9(3)    |
| C13-C14-C15-C2    | -150.1(2)  |
| C16'-C15-C16-C17  | -74.2(17)  |
| C2-C15-C16-C17    | 21.8(6)    |
| C14-C15-C16-C17   | -157.3(3)  |
| C16'-C15-C16-C45  | 109.8(18)  |
| C2-C15-C16-C45    | -154.2(3)  |
| C14-C15-C16-C45   | 26.8(6)    |
| C16-C15-C16'-C17  | 79(2)      |
| C2-C15-C16'-C17   | -14(2)     |
| C14-C15-C16'-C17  | -174.2(11) |
| C16-C15-C16'-C45' | -88(3)     |
| C2-C15-C16'-C45'  | 179.1(15)  |
| C14-C15-C16'-C45' | 19(3)      |
| C15-C16'-C17-C18  | -166.2(11) |
| C45'-C16'-C17-C18 | 3(2)       |
| C15-C16'-C17-C34  | 33(2)      |
| C45'-C16'-C17-C34 | -158.5(11) |
| C15-C16'-C17-C16  | -74.7(17)  |
| C45'-C16'-C17-C16 | 94(3)      |
| C15-C16-C17-C18   | 177.0(3)   |
| C45-C16-C17-C18   | -7.2(7)    |
| C15-C16-C17-C16'  | 78.2(18)   |
| C45-C16-C17-C16'  | -106.0(18) |
| C15-C16-C17-C34   | -2.5(6)    |

|                  |            |
|------------------|------------|
| C45-C16-C17-C34  | 173.3(3)   |
| C16'-C17-C18-C19 | -153.7(12) |
| C34-C17-C18-C19  | 7.0(4)     |
| C16-C17-C18-C19  | -172.5(4)  |
| C17-C18-C19-C32  | 2.4(4)     |
| C17-C18-C19-C20  | -176.8(2)  |
| C18-C19-C20-C21  | -0.5(4)    |
| C32-C19-C20-C21  | -179.8(2)  |
| C18-C19-C20-C25  | 178.2(2)   |
| C32-C19-C20-C25  | -1.0(3)    |
| C25-C20-C21-C22  | -1.3(4)    |
| C19-C20-C21-C22  | 177.5(3)   |
| C20-C21-C22-C23  | 0.5(5)     |
| C21-C22-C23-C24  | -0.3(5)    |
| C22-C23-C24-C25  | 1.0(4)     |
| C23-C24-C25-C20  | -1.8(4)    |
| C23-C24-C25-C26  | 174.9(3)   |
| C21-C20-C25-C24  | 1.9(4)     |
| C19-C20-C25-C24  | -176.9(2)  |
| C21-C20-C25-C26  | -174.8(2)  |
| C19-C20-C25-C26  | 6.4(3)     |
| C24-C25-C26-C31  | -179.5(2)  |
| C20-C25-C26-C31  | -2.9(4)    |
| C24-C25-C26-C27  | -2.8(4)    |
| C20-C25-C26-C27  | 173.9(3)   |
| C31-C26-C27-C28  | 3.8(5)     |
| C25-C26-C27-C28  | -172.9(3)  |
| C26-C27-C28-C29  | -0.4(6)    |
| C27-C28-C29-C30  | -2.5(6)    |
| C28-C29-C30-C31  | 2.0(5)     |
| C29-C30-C31-C26  | 1.5(4)     |
| C29-C30-C31-C32  | -180.0(3)  |
| C27-C26-C31-C30  | -4.3(4)    |
| C25-C26-C31-C30  | 172.5(2)   |
| C27-C26-C31-C32  | 177.2(2)   |
| C25-C26-C31-C32  | -6.0(4)    |
| C18-C19-C32-C33  | -8.3(3)    |
| C20-C19-C32-C33  | 170.9(2)   |



|                  |           |
|------------------|-----------|
| C18-C19-C32-C31  | 172.9(2)  |
| C20-C19-C32-C31  | -7.8(3)   |
| C30-C31-C32-C33  | 14.2(4)   |
| C26-C31-C32-C33  | -167.3(2) |
| C30-C31-C32-C19  | -167.1(2) |
| C26-C31-C32-C19  | 11.4(3)   |
| C19-C32-C33-C34  | 4.8(3)    |
| C31-C32-C33-C34  | -176.5(2) |
| C32-C33-C34-C17  | 4.7(4)    |
| C32-C33-C34-C1   | -173.3(2) |
| C18-C17-C34-C33  | -10.4(3)  |
| C16'-C17-C34-C33 | 151.8(10) |
| C16-C17-C34-C33  | 169.1(3)  |
| C18-C17-C34-C1   | 167.7(2)  |
| C16'-C17-C34-C1  | -30.2(11) |
| C16-C17-C34-C1   | -12.8(4)  |
| C2-C1-C34-C33    | -173.7(2) |
| C35-C1-C34-C33   | 1.7(3)    |
| C2-C1-C34-C17    | 8.3(3)    |
| C35-C1-C34-C17   | -176.3(2) |
| C2-C1-C35-C36    | 58.5(3)   |
| C34-C1-C35-C36   | -116.8(2) |
| C2-C1-C35-C44    | -120.1(3) |
| C34-C1-C35-C44   | 64.6(3)   |
| C44-C35-C36-C37  | 2.3(3)    |
| C1-C35-C36-C37   | -176.4(2) |
| C35-C36-C37-C38  | -1.0(4)   |
| C36-C37-C38-C39  | -0.6(4)   |
| C37-C38-C39-C40  | -179.6(2) |
| C37-C38-C39-C44  | 0.9(4)    |
| C38-C39-C40-C41  | 178.4(3)  |
| C44-C39-C40-C41  | -2.1(4)   |
| C39-C40-C41-C42  | 2.0(4)    |
| C40-C41-C42-C43  | 0.6(4)    |
| C41-C42-C43-C44  | -2.9(4)   |
| C42-C43-C44-C35  | -178.4(2) |
| C42-C43-C44-C39  | 2.7(3)    |
| C36-C35-C44-C43  | 179.2(2)  |

|                     |            |
|---------------------|------------|
| C1-C35-C44-C43      | -2.1(3)    |
| C36-C35-C44-C39     | -1.9(3)    |
| C1-C35-C44-C39      | 176.74(19) |
| C38-C39-C44-C43     | 179.3(2)   |
| C40-C39-C44-C43     | -0.3(3)    |
| C38-C39-C44-C35     | 0.4(3)     |
| C40-C39-C44-C35     | -179.2(2)  |
| C15-C16-C45-C46     | 65.9(6)    |
| C17-C16-C45-C46     | -109.8(5)  |
| C15-C16-C45-C54     | -113.0(4)  |
| C17-C16-C45-C54     | 71.2(6)    |
| C54-C45-C46-C47     | 0.8(6)     |
| C16-C45-C46-C47     | -178.2(4)  |
| C45-C46-C47-C48     | 1.7(7)     |
| C46-C47-C48-C49     | -1.5(7)    |
| C47-C48-C49-C50     | -179.3(5)  |
| C47-C48-C49-C54     | -1.1(9)    |
| C48-C49-C50-C51     | 179.0(5)   |
| C54-C49-C50-C51     | 0.8(9)     |
| C49-C50-C51-C52     | -0.6(6)    |
| C50-C51-C52-C53     | 0.6(6)     |
| C51-C52-C53-C54     | -0.8(7)    |
| C52-C53-C54-C49     | 1.0(7)     |
| C52-C53-C54-C45     | 178.1(4)   |
| C50-C49-C54-C53     | -1.0(9)    |
| C48-C49-C54-C53     | -179.2(5)  |
| C50-C49-C54-C45     | -178.2(5)  |
| C48-C49-C54-C45     | 3.5(8)     |
| C46-C45-C54-C53     | 179.5(4)   |
| C16-C45-C54-C53     | -1.6(5)    |
| C46-C45-C54-C49     | -3.4(6)    |
| C16-C45-C54-C49     | 175.6(5)   |
| C17-C16'-C45'-C46'  | 73(2)      |
| C15-C16'-C45'-C46'  | -119(2)    |
| C17-C16'-C45'-C54'  | -111.6(16) |
| C15-C16'-C45'-C54'  | 56(3)      |
| C54'-C45'-C46'-C47' | -2(3)      |
| C16'-C45'-C46'-C47' | 172.8(18)  |

|                     |            |
|---------------------|------------|
| C45'-C46'-C47'-C48' | 1(3)       |
| C46'-C47'-C48'-C49' | 2(3)       |
| C47'-C48'-C49'-C50' | -179(3)    |
| C47'-C48'-C49'-C54' | -5(4)      |
| C48'-C49'-C50'-C51' | 179(2)     |
| C54'-C49'-C50'-C51' | 6(4)       |
| C49'-C50'-C51'-C52' | -1(3)      |
| C50'-C51'-C52'-C53' | 0(3)       |
| C51'-C52'-C53'-C54' | -3(3)      |
| C52'-C53'-C54'-C45' | -179.4(18) |
| C52'-C53'-C54'-C49' | 7(3)       |
| C46'-C45'-C54'-C53' | -174.0(19) |
| C16'-C45'-C54'-C53' | 11(2)      |
| C46'-C45'-C54'-C49' | 0(3)       |
| C16'-C45'-C54'-C49' | -175(2)    |
| C50'-C49'-C54'-C53' | -8(4)      |
| C48'-C49'-C54'-C53' | 178(3)     |
| C50'-C49'-C54'-C45' | 178(2)     |
| C48'-C49'-C54'-C45' | 4(4)       |

2.3. 9,20-Bis(4-hexylnaphthalen-1-yl)tetrabenzo[*a,c,j,l*]tetracene (**2b**)

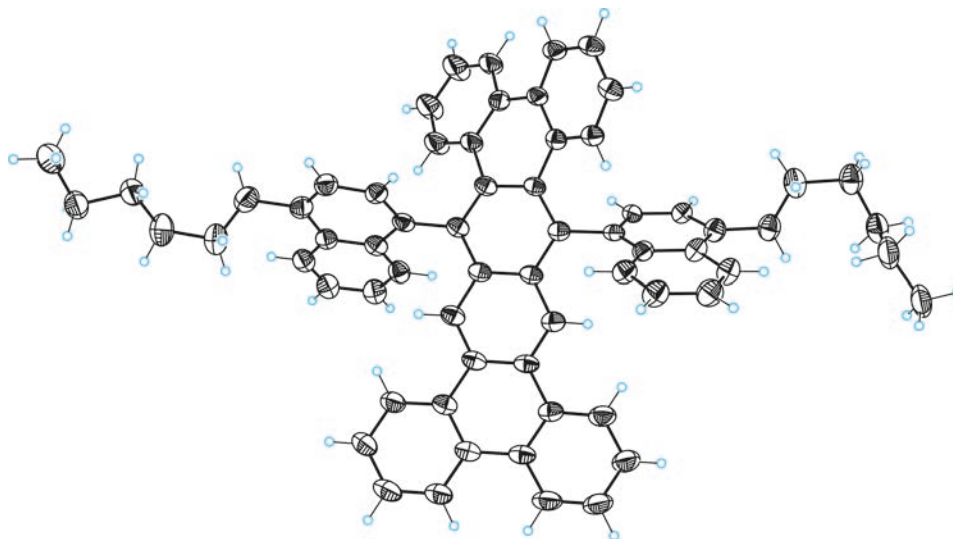

**Table 7.** Crystal data and structure refinement for **2b**.

Identification code

RD470\_0m

|                                   |                                                                           |
|-----------------------------------|---------------------------------------------------------------------------|
| Empirical formula                 | C66.15 H56.83 Cl0.45                                                      |
| Formula weight                    | 867.69                                                                    |
| Temperature                       | 100(2) K                                                                  |
| Wavelength                        | 0.71073 Å                                                                 |
| Crystal system                    | Monoclinic                                                                |
| Space group                       | P2(1)/c                                                                   |
| Unit cell dimensions              | a = 9.3755(6)Å      a = 90°.<br>b = 26.1158(14)Å      b =<br>101.625(2)°. |
| Volume                            | c = 20.0039(14)Å      g = 90°.<br>4797.5(5) Å <sup>3</sup>                |
| Z                                 | 4                                                                         |
| Density (calculated)              | 1.201 Mg/m <sup>3</sup>                                                   |
| Absorption coefficient            | 0.092 mm <sup>-1</sup>                                                    |
| F(000)                            | 1846                                                                      |
| Crystal size                      | 0.04 x 0.005 x 0.005 mm <sup>3</sup>                                      |
| Theta range for data collection   | 1.874 to 25.042°.                                                         |
| Index ranges                      | -11<=h<=7,-27<=k<=27,-23<=l<=22                                           |
| Reflections collected             | 22882                                                                     |
| Independent reflections           | 7790[R(int) = 0.0418]                                                     |
| Completeness to theta =25.042°    | 97.899994%                                                                |
| Absorption correction             | Empirical                                                                 |
| Max. and min. transmission        | 1.000 and 0.887                                                           |
| Refinement method                 | Full-matrix least-squares on F <sup>2</sup>                               |
| Data / restraints / parameters    | 7790/ 1192/ 1015                                                          |
| Goodness-of-fit on F <sup>2</sup> | 1.056                                                                     |
| Final R indices [I>2sigma(I)]     | R1 = 0.0769, wR2 = 0.2148                                                 |
| R indices (all data)              | R1 = 0.1286, wR2 = 0.2486                                                 |
| Largest diff. peak and hole       | 0.665 and -0.531 e.Å <sup>-3</sup>                                        |

**Table 8.** Bond lengths [Å] and angles [°] for **2b**.

---

|                  |           |
|------------------|-----------|
| Bond lengths---- |           |
| C1-C34           | 1.402(5)  |
| C1-C2            | 1.419(5)  |
| C1-C35           | 1.509(7)  |
| C1-C35'          | 1.514(10) |
| C2-C3            | 1.419(5)  |

|          |          |
|----------|----------|
| C2-C19   | 1.426(5) |
| C3-C4    | 1.382(5) |
| C4-C17   | 1.429(5) |
| C4-C5    | 1.473(5) |
| C5-C6    | 1.401(6) |
| C5-C10   | 1.407(5) |
| C6-C7    | 1.377(6) |
| C7-C8    | 1.383(6) |
| C8-C9    | 1.368(6) |
| C9-C10   | 1.412(6) |
| C10-C11  | 1.474(6) |
| C11-C12  | 1.395(5) |
| C11-C16  | 1.411(5) |
| C12-C13  | 1.383(6) |
| C13-C14  | 1.384(6) |
| C14-C15  | 1.373(6) |
| C15-C16  | 1.410(5) |
| C16-C17  | 1.468(5) |
| C17-C18  | 1.390(5) |
| C18-C19  | 1.413(5) |
| C19-C20  | 1.426(5) |
| C20-C21  | 1.391(5) |
| C20-C51' | 1.510(9) |
| C20-C51  | 1.515(8) |
| C21-C34  | 1.442(5) |
| C21-C22  | 1.486(5) |
| C22-C23  | 1.404(6) |
| C22-C27  | 1.408(5) |
| C23-C24  | 1.369(6) |
| C24-C25  | 1.376(6) |
| C25-C26  | 1.376(6) |
| C26-C27  | 1.402(5) |
| C27-C28  | 1.474(5) |
| C28-C33  | 1.398(5) |
| C28-C29  | 1.403(5) |
| C29-C30  | 1.378(6) |
| C30-C31  | 1.388(5) |
| C31-C32  | 1.382(5) |

|             |           |
|-------------|-----------|
| C32-C33     | 1.407(5)  |
| C33-C34     | 1.469(5)  |
| C35-C36     | 1.33(4)   |
| C35-C44     | 1.39(3)   |
| C36-C37     | 1.41(2)   |
| C37-C38     | 1.379(16) |
| C38-C39     | 1.44(2)   |
| C38-C45     | 1.524(7)  |
| C39-C40     | 1.429(19) |
| C39-C44     | 1.44(2)   |
| C40-C41     | 1.380(18) |
| C41-C42     | 1.41(2)   |
| C42-C43     | 1.36(3)   |
| C43-C44     | 1.42(4)   |
| C45-C46     | 1.535(7)  |
| C46-C47"    | 1.531(10) |
| C47-C48     | 1.574(8)  |
| C48-C49     | 1.498(8)  |
| C49-C50     | 1.552(9)  |
| C47"-C48"   | 1.513(10) |
| C48"-C49"   | 1.520(10) |
| C49"-C50"   | 1.553(10) |
| C49"-C50"#1 | 1.83(2)   |
| C50"-C49"#1 | 1.83(2)   |
| C50"-C50"#1 | 2.00(4)   |
| C35'-C36'   | 1.46(8)   |
| C35'-C44'   | 1.52(6)   |
| C36'-C37'   | 1.42(4)   |
| C37'-C38'   | 1.34(3)   |
| C38'-C39'   | 1.39(4)   |
| C38'-C45'   | 1.518(10) |
| C39'-C40'   | 1.40(4)   |
| C39'-C44'   | 1.42(4)   |
| C40'-C41'   | 1.32(3)   |
| C41'-C42'   | 1.45(3)   |
| C42'-C43'   | 1.37(5)   |
| C43'-C44'   | 1.42(6)   |
| C45'-C46'   | 1.533(9)  |

|           |           |
|-----------|-----------|
| C46'-C47' | 1.539(9)  |
| C47'-C48' | 1.538(9)  |
| C48'-C49' | 1.607(9)  |
| C49'-C50' | 1.565(10) |
| C51-C52   | 1.400(15) |
| C51-C60   | 1.452(15) |
| C52-C53   | 1.398(17) |
| C53-C54   | 1.376(13) |
| C54-C55   | 1.437(12) |
| C54-C61   | 1.540(8)  |
| C55-C56   | 1.417(12) |
| C55-C60   | 1.421(14) |
| C56-C57   | 1.343(13) |
| C57-C58   | 1.379(13) |
| C58-C59   | 1.389(15) |
| C59-C60   | 1.401(13) |
| C61-C62   | 1.533(8)  |
| C62-C63   | 1.520(8)  |
| C63-C64   | 1.530(8)  |
| C64-C65   | 1.538(8)  |
| C65-C66   | 1.531(9)  |
| C51'-C52' | 1.30(3)   |
| C51'-C60' | 1.42(2)   |
| C52'-C53' | 1.47(3)   |
| C53'-C54' | 1.366(19) |
| C54'-C55' | 1.440(18) |
| C54'-C61' | 1.528(11) |
| C55'-C56' | 1.38(2)   |
| C55'-C60' | 1.40(2)   |
| C56'-C57' | 1.37(2)   |
| C57'-C58' | 1.41(2)   |
| C58'-C59' | 1.356(19) |
| C59'-C60' | 1.435(19) |
| C61'-C62' | 1.542(11) |
| C62'-C63' | 1.542(11) |
| C63'-C64' | 1.543(11) |
| C64'-C65' | 1.542(11) |
| C65'-C66' | 1.540(11) |

|           |           |
|-----------|-----------|
| C61"-C62" | 1.543(10) |
| C62"-C63" | 1.542(10) |
| C63"-C64" | 1.544(10) |
| C64"-C65" | 1.539(10) |
| C65"-C66" | 1.538(10) |
| C11S-C1S  | 1.793(11) |
| C12S-C1S  | 1.777(10) |
| C1S-C13S  | 1.776(10) |

Angles-----

|             |           |
|-------------|-----------|
| C34-C1-C2   | 118.9(3)  |
| C34-C1-C35  | 119.8(16) |
| C2-C1-C35   | 120.8(15) |
| C34-C1-C35' | 119(3)    |
| C2-C1-C35'  | 122(3)    |
| C1-C2-C3    | 121.7(3)  |
| C1-C2-C19   | 119.6(3)  |
| C3-C2-C19   | 118.5(3)  |
| C4-C3-C2    | 122.6(4)  |
| C3-C4-C17   | 118.9(3)  |
| C3-C4-C5    | 121.2(4)  |
| C17-C4-C5   | 119.8(3)  |
| C6-C5-C10   | 118.6(4)  |
| C6-C5-C4    | 121.7(3)  |
| C10-C5-C4   | 119.7(3)  |
| C7-C6-C5    | 122.3(4)  |
| C6-C7-C8    | 119.1(4)  |
| C9-C8-C7    | 120.1(4)  |
| C8-C9-C10   | 122.0(4)  |
| C5-C10-C9   | 118.0(4)  |
| C5-C10-C11  | 120.4(3)  |
| C9-C10-C11  | 121.4(4)  |
| C12-C11-C16 | 119.4(4)  |
| C12-C11-C10 | 120.7(4)  |
| C16-C11-C10 | 119.8(3)  |
| C13-C12-C11 | 120.7(4)  |
| C12-C13-C14 | 120.5(4)  |
| C15-C14-C13 | 119.4(4)  |



|              |           |
|--------------|-----------|
| C14-C15-C16  | 121.8(4)  |
| C15-C16-C11  | 118.0(3)  |
| C15-C16-C17  | 121.8(3)  |
| C11-C16-C17  | 120.1(3)  |
| C18-C17-C4   | 118.4(3)  |
| C18-C17-C16  | 121.9(3)  |
| C4-C17-C16   | 119.6(3)  |
| C17-C18-C19  | 123.4(4)  |
| C18-C19-C2   | 117.5(3)  |
| C18-C19-C20  | 122.9(3)  |
| C2-C19-C20   | 119.6(3)  |
| C21-C20-C19  | 119.5(3)  |
| C21-C20-C51' | 123.0(14) |
| C19-C20-C51' | 117.5(14) |
| C21-C20-C51  | 118.7(9)  |
| C19-C20-C51  | 120.8(10) |
| C20-C21-C34  | 118.8(3)  |
| C20-C21-C22  | 125.1(3)  |
| C34-C21-C22  | 115.8(3)  |
| C23-C22-C27  | 117.1(3)  |
| C23-C22-C21  | 122.4(3)  |
| C27-C22-C21  | 119.8(3)  |
| C24-C23-C22  | 122.3(4)  |
| C23-C24-C25  | 120.4(4)  |
| C26-C25-C24  | 119.2(4)  |
| C25-C26-C27  | 121.3(4)  |
| C26-C27-C22  | 119.7(4)  |
| C26-C27-C28  | 121.2(4)  |
| C22-C27-C28  | 119.2(3)  |
| C33-C28-C29  | 120.0(4)  |
| C33-C28-C27  | 118.4(3)  |
| C29-C28-C27  | 121.6(3)  |
| C30-C29-C28  | 120.6(4)  |
| C29-C30-C31  | 119.9(4)  |
| C32-C31-C30  | 119.9(4)  |
| C31-C32-C33  | 121.3(4)  |
| C28-C33-C32  | 118.2(3)  |
| C28-C33-C34  | 120.0(3)  |

|                    |           |
|--------------------|-----------|
| C32-C33-C34        | 121.4(3)  |
| C1-C34-C21         | 119.5(3)  |
| C1-C34-C33         | 123.1(3)  |
| C21-C34-C33        | 117.3(3)  |
| C36-C35-C44        | 123.2(12) |
| C36-C35-C1         | 115(2)    |
| C44-C35-C1         | 122(2)    |
| C35-C36-C37        | 120.3(15) |
| C38-C37-C36        | 121.5(14) |
| C37-C38-C39        | 117.7(10) |
| C37-C38-C45        | 120.3(10) |
| C39-C38-C45        | 122.0(10) |
| C40-C39-C44        | 117.5(15) |
| C40-C39-C38        | 122.5(13) |
| C44-C39-C38        | 120.0(13) |
| C41-C40-C39        | 122.4(13) |
| C40-C41-C42        | 119.6(12) |
| C43-C42-C41        | 119.2(18) |
| C42-C43-C44        | 124(2)    |
| C35-C44-C43        | 125.2(18) |
| C35-C44-C39        | 117.2(17) |
| C43-C44-C39        | 117.6(16) |
| C38-C45-C46        | 112.3(6)  |
| C47"-C46-C45       | 116.3(9)  |
| C49-C48-C47        | 113.2(7)  |
| C48-C49-C50        | 113.2(8)  |
| C48"-C47"-C46      | 114.5(9)  |
| C47"-C48"-C49"     | 112.8(9)  |
| C48"-C49"-C50"     | 109.2(9)  |
| C48"-C49"-C50"#1   | 163.7(15) |
| C50"-C49"-C50"#1   | 71.9(13)  |
| C49"-C50"-C49"#1   | 108.1(13) |
| C49"-C50"-C50"#1   | 60.5(9)   |
| C49"#1-C50"-C50"#1 | 47.6(8)   |
| C36'-C35'-C1       | 119(4)    |
| C36'-C35'-C44'     | 111(2)    |
| C1-C35'-C44'       | 130(5)    |
| C37'-C36'-C35'     | 123(3)    |

|                |           |
|----------------|-----------|
| C38'-C37'-C36' | 122(3)    |
| C37'-C38'-C39' | 120(2)    |
| C37'-C38'-C45' | 117(2)    |
| C39'-C38'-C45' | 123(2)    |
| C38'-C39'-C40' | 121(2)    |
| C38'-C39'-C44' | 121(3)    |
| C40'-C39'-C44' | 118(3)    |
| C41'-C40'-C39' | 122(2)    |
| C40'-C41'-C42' | 120(2)    |
| C43'-C42'-C41' | 121(3)    |
| C42'-C43'-C44' | 117(4)    |
| C39'-C44'-C43' | 122(3)    |
| C39'-C44'-C35' | 122(3)    |
| C43'-C44'-C35' | 116(3)    |
| C38'-C45'-C46' | 114.2(14) |
| C45'-C46'-C47' | 112.1(8)  |
| C48'-C47'-C46' | 111.6(8)  |
| C47'-C48'-C49' | 107.1(8)  |
| C50'-C49'-C48' | 102.9(8)  |
| C52-C51-C60    | 115.4(9)  |
| C52-C51-C20    | 122.1(10) |
| C60-C51-C20    | 122.4(10) |
| C53-C52-C51    | 123.8(10) |
| C54-C53-C52    | 120.6(8)  |
| C53-C54-C55    | 119.6(7)  |
| C53-C54-C61    | 119.6(8)  |
| C55-C54-C61    | 120.8(9)  |
| C56-C55-C60    | 118.9(9)  |
| C56-C55-C54    | 122.0(9)  |
| C60-C55-C54    | 119.0(8)  |
| C57-C56-C55    | 120.6(9)  |
| C56-C57-C58    | 121.5(10) |
| C57-C58-C59    | 119.8(9)  |
| C58-C59-C60    | 120.7(9)  |
| C59-C60-C55    | 118.4(9)  |
| C59-C60-C51    | 119.9(9)  |
| C55-C60-C51    | 121.5(8)  |
| C62-C61-C54    | 112.2(6)  |

|                |           |
|----------------|-----------|
| C63-C62-C61    | 110.0(8)  |
| C62-C63-C64    | 119.9(9)  |
| C63-C64-C65    | 107.4(9)  |
| C66-C65-C64    | 101.0(9)  |
| C52'-C51'-C60' | 123.7(14) |
| C52'-C51'-C20  | 112.7(16) |
| C60'-C51'-C20  | 123.6(14) |
| C51'-C52'-C53' | 118.1(15) |
| C54'-C53'-C52' | 120.8(13) |
| C53'-C54'-C55' | 119.7(11) |
| C53'-C54'-C61' | 112(3)    |
| C55'-C54'-C61' | 128(2)    |
| C56'-C55'-C60' | 121.6(14) |
| C56'-C55'-C54' | 120.3(13) |
| C60'-C55'-C54' | 118.1(12) |
| C57'-C56'-C55' | 119.6(14) |
| C56'-C57'-C58' | 120.0(13) |
| C59'-C58'-C57' | 121.5(12) |
| C58'-C59'-C60' | 119.2(13) |
| C55'-C60'-C51' | 119.4(14) |
| C55'-C60'-C59' | 118.1(15) |
| C51'-C60'-C59' | 122.5(14) |
| C54'-C61'-C62' | 126(3)    |
| C63'-C62'-C61' | 128(5)    |
| C62'-C63'-C64' | 91(3)     |
| C65'-C64'-C63' | 131(6)    |
| C66'-C65'-C64' | 137(7)    |
| C63"-C62"-C61" | 121.0(15) |
| C62"-C63"-C64" | 127.6(15) |
| C65"-C64"-C63" | 116.6(16) |
| C66"-C65"-C64" | 131(2)    |
| C13S-C1S-C12S  | 105.2(10) |
| C13S-C1S-C11S  | 112.3(10) |
| C12S-C1S-C11S  | 107.5(10) |

-----  
Symmetry transformations used to generate equivalent atoms:

#1 -x+1, -y+1, -z+2

**Table 9.** Torsion angles [°] for **2b**.

---

|                 |            |
|-----------------|------------|
| C34-C1-C2-C3    | -176.3(3)  |
| C35-C1-C2-C3    | 11.9(16)   |
| C35'-C1-C2-C3   | 7(3)       |
| C34-C1-C2-C19   | -1.8(5)    |
| C35-C1-C2-C19   | -173.7(15) |
| C35'-C1-C2-C19  | -178(3)    |
| C1-C2-C3-C4     | 166.0(4)   |
| C19-C2-C3-C4    | -8.5(5)    |
| C2-C3-C4-C17    | 2.1(6)     |
| C2-C3-C4-C5     | -175.2(3)  |
| C3-C4-C5-C6     | 1.3(6)     |
| C17-C4-C5-C6    | -176.0(4)  |
| C3-C4-C5-C10    | -179.3(4)  |
| C17-C4-C5-C10   | 3.4(5)     |
| C10-C5-C6-C7    | 1.3(6)     |
| C4-C5-C6-C7     | -179.3(4)  |
| C5-C6-C7-C8     | -1.1(7)    |
| C6-C7-C8-C9     | 0.4(8)     |
| C7-C8-C9-C10    | 0.1(7)     |
| C6-C5-C10-C9    | -0.7(6)    |
| C4-C5-C10-C9    | 179.9(4)   |
| C6-C5-C10-C11   | 174.4(4)   |
| C4-C5-C10-C11   | -5.0(6)    |
| C8-C9-C10-C5    | 0.1(6)     |
| C8-C9-C10-C11   | -175.0(4)  |
| C5-C10-C11-C12  | -176.3(4)  |
| C9-C10-C11-C12  | -1.3(6)    |
| C5-C10-C11-C16  | 0.7(6)     |
| C9-C10-C11-C16  | 175.6(4)   |
| C16-C11-C12-C13 | -3.4(7)    |
| C10-C11-C12-C13 | 173.6(4)   |
| C11-C12-C13-C14 | 0.3(8)     |
| C12-C13-C14-C15 | 1.9(8)     |
| C13-C14-C15-C16 | -0.9(7)    |
| C14-C15-C16-C11 | -2.2(6)    |
| C14-C15-C16-C17 | 179.8(4)   |

|                  |           |
|------------------|-----------|
| C12-C11-C16-C15  | 4.2(6)    |
| C10-C11-C16-C15  | -172.7(4) |
| C12-C11-C16-C17  | -177.7(4) |
| C10-C11-C16-C17  | 5.3(5)    |
| C3-C4-C17-C18    | 4.5(5)    |
| C5-C4-C17-C18    | -178.2(3) |
| C3-C4-C17-C16    | -174.8(3) |
| C5-C4-C17-C16    | 2.5(5)    |
| C15-C16-C17-C18  | -8.2(6)   |
| C11-C16-C17-C18  | 173.9(3)  |
| C15-C16-C17-C4   | 171.1(4)  |
| C11-C16-C17-C4   | -6.9(5)   |
| C4-C17-C18-C19   | -4.7(6)   |
| C16-C17-C18-C19  | 174.6(3)  |
| C17-C18-C19-C2   | -1.7(6)   |
| C17-C18-C19-C20  | 178.7(4)  |
| C1-C2-C19-C18    | -166.5(3) |
| C3-C2-C19-C18    | 8.1(5)    |
| C1-C2-C19-C20    | 13.1(5)   |
| C3-C2-C19-C20    | -172.3(3) |
| C18-C19-C20-C21  | 173.3(3)  |
| C2-C19-C20-C21   | -6.3(5)   |
| C18-C19-C20-C51' | -6.7(12)  |
| C2-C19-C20-C51'  | 173.6(11) |
| C18-C19-C20-C51  | 5.0(9)    |
| C2-C19-C20-C51   | -174.7(7) |
| C19-C20-C21-C34  | -11.3(5)  |
| C51'-C20-C21-C34 | 168.8(11) |
| C51-C20-C21-C34  | 157.3(8)  |
| C19-C20-C21-C22  | 162.7(4)  |
| C51'-C20-C21-C22 | -17.2(12) |
| C51-C20-C21-C22  | -28.7(9)  |
| C20-C21-C22-C23  | -20.0(6)  |
| C34-C21-C22-C23  | 154.2(4)  |
| C20-C21-C22-C27  | 170.2(4)  |
| C34-C21-C22-C27  | -15.7(5)  |
| C27-C22-C23-C24  | 0.4(7)    |
| C21-C22-C23-C24  | -169.7(4) |

|                 |           |
|-----------------|-----------|
| C22-C23-C24-C25 | 1.0(8)    |
| C23-C24-C25-C26 | -1.5(9)   |
| C24-C25-C26-C27 | 0.5(8)    |
| C25-C26-C27-C22 | 0.9(7)    |
| C25-C26-C27-C28 | -178.6(4) |
| C23-C22-C27-C26 | -1.3(6)   |
| C21-C22-C27-C26 | 169.1(4)  |
| C23-C22-C27-C28 | 178.1(4)  |
| C21-C22-C27-C28 | -11.5(5)  |
| C26-C27-C28-C33 | -159.0(4) |
| C22-C27-C28-C33 | 21.6(5)   |
| C26-C27-C28-C29 | 22.9(6)   |
| C22-C27-C28-C29 | -156.5(4) |
| C33-C28-C29-C30 | 0.1(5)    |
| C27-C28-C29-C30 | 178.1(3)  |
| C28-C29-C30-C31 | -1.4(5)   |
| C29-C30-C31-C32 | 1.0(5)    |
| C30-C31-C32-C33 | 0.7(5)    |
| C29-C28-C33-C32 | 1.6(5)    |
| C27-C28-C33-C32 | -176.5(3) |
| C29-C28-C33-C34 | 174.3(3)  |
| C27-C28-C33-C34 | -3.9(5)   |
| C31-C32-C33-C28 | -2.0(5)   |
| C31-C32-C33-C34 | -174.6(3) |
| C2-C1-C34-C21   | -15.9(5)  |
| C35-C1-C34-C21  | 156.0(15) |
| C35'-C1-C34-C21 | 161(3)    |
| C2-C1-C34-C33   | 159.1(3)  |
| C35-C1-C34-C33  | -29.0(15) |
| C35'-C1-C34-C33 | -24(3)    |
| C20-C21-C34-C1  | 22.7(5)   |
| C22-C21-C34-C1  | -151.8(3) |
| C20-C21-C34-C33 | -152.6(3) |
| C22-C21-C34-C33 | 32.9(5)   |
| C28-C33-C34-C1  | 161.2(3)  |
| C32-C33-C34-C1  | -26.3(5)  |
| C28-C33-C34-C21 | -23.6(5)  |
| C32-C33-C34-C21 | 148.8(3)  |

|                       |            |
|-----------------------|------------|
| C34-C1-C35-C36        | -57(3)     |
| C2-C1-C35-C36         | 115(3)     |
| C35'-C1-C35-C36       | -130(65)   |
| C34-C1-C35-C44        | 120(3)     |
| C2-C1-C35-C44         | -68(3)     |
| C35'-C1-C35-C44       | 47(61)     |
| C44-C35-C36-C37       | 3(4)       |
| C1-C35-C36-C37        | -180.0(19) |
| C35-C36-C37-C38       | -2(3)      |
| C36-C37-C38-C39       | 0.6(19)    |
| C36-C37-C38-C45       | -178.2(14) |
| C37-C38-C39-C40       | 178.2(11)  |
| C45-C38-C39-C40       | -3.0(16)   |
| C37-C38-C39-C44       | 0.3(18)    |
| C45-C38-C39-C44       | 179.0(12)  |
| C44-C39-C40-C41       | -1.1(17)   |
| C38-C39-C40-C41       | -179.1(11) |
| C39-C40-C41-C42       | 0.6(15)    |
| C40-C41-C42-C43       | -1.1(19)   |
| C41-C42-C43-C44       | 2(3)       |
| C36-C35-C44-C43       | 178(3)     |
| C1-C35-C44-C43        | 2(4)       |
| C36-C35-C44-C39       | -3(4)      |
| C1-C35-C44-C39        | -179(2)    |
| C42-C43-C44-C35       | 177(2)     |
| C42-C43-C44-C39       | -3(3)      |
| C40-C39-C44-C35       | -177(2)    |
| C38-C39-C44-C35       | 1(3)       |
| C40-C39-C44-C43       | 2(2)       |
| C38-C39-C44-C43       | 180.0(16)  |
| C37-C38-C45-C46       | 98.0(10)   |
| C39-C38-C45-C46       | -80.7(12)  |
| C38-C45-C46-C47"      | 175.7(10)  |
| C47-C48-C49-C50       | 165.1(11)  |
| C45-C46-C47"-C48"     | -31.4(17)  |
| C46-C47"-C48"-C49"    | -79.0(18)  |
| C47"-C48"-C49"-C50"   | -173.5(13) |
| C47"-C48"-C49"-C50"#1 | 95(5)      |



|                         |            |
|-------------------------|------------|
| C48"-C49"-C50"-C49"#1   | -162.8(17) |
| C50"#1-C49"-C50"-C49"#1 | 0.003(2)   |
| C48"-C49"-C50"-C50"#1   | -162.8(17) |
| C34-C1-C35'-C36'        | -64(6)     |
| C2-C1-C35'-C36'         | 112(5)     |
| C35-C1-C35'-C36'        | 44(59)     |
| C34-C1-C35'-C44'        | 119(6)     |
| C2-C1-C35'-C44'         | -64(7)     |
| C35-C1-C35'-C44'        | -132(67)   |
| C1-C35'-C36'-C37'       | 174(4)     |
| C44'-C35'-C36'-C37'     | -9(7)      |
| C35'-C36'-C37'-C38'     | 6(6)       |
| C36'-C37'-C38'-C39'     | 1(4)       |
| C36'-C37'-C38'-C45'     | -175(3)    |
| C37'-C38'-C39'-C40'     | 180(2)     |
| C45'-C38'-C39'-C40'     | -5(4)      |
| C37'-C38'-C39'-C44'     | -3(4)      |
| C45'-C38'-C39'-C44'     | 173(3)     |
| C38'-C39'-C40'-C41'     | 177(2)     |
| C44'-C39'-C40'-C41'     | 0(3)       |
| C39'-C40'-C41'-C42'     | -2(3)      |
| C40'-C41'-C42'-C43'     | 1(3)       |
| C41'-C42'-C43'-C44'     | 2(4)       |
| C38'-C39'-C44'-C43'     | -174(3)    |
| C40'-C39'-C44'-C43'     | 4(5)       |
| C38'-C39'-C44'-C35'     | -1(5)      |
| C40'-C39'-C44'-C35'     | 176(4)     |
| C42'-C43'-C44'-C39'     | -4(5)      |
| C42'-C43'-C44'-C35'     | -177(4)    |
| C36'-C35'-C44'-C39'     | 7(7)       |
| C1-C35'-C44'-C39'       | -176(5)    |
| C36'-C35'-C44'-C43'     | -180(4)    |
| C1-C35'-C44'-C43'       | -3(8)      |
| C37'-C38'-C45'-C46'     | -97(2)     |
| C39'-C38'-C45'-C46'     | 87(3)      |
| C38'-C45'-C46'-C47'     | -179.6(16) |
| C45'-C46'-C47'-C48'     | -169.8(14) |
| C46'-C47'-C48'-C49'     | -169.9(12) |

|                     |            |
|---------------------|------------|
| C47'-C48'-C49'-C50' | 82.9(17)   |
| C21-C20-C51-C52     | -58(2)     |
| C19-C20-C51-C52     | 110.7(17)  |
| C51'-C20-C51-C52    | -174(14)   |
| C21-C20-C51-C60     | 120.5(16)  |
| C19-C20-C51-C60     | -71(2)     |
| C51'-C20-C51-C60    | 4(11)      |
| C60-C51-C52-C53     | -3(2)      |
| C20-C51-C52-C53     | 174.8(16)  |
| C51-C52-C53-C54     | 3(2)       |
| C52-C53-C54-C55     | 0.0(15)    |
| C52-C53-C54-C61     | 177.3(10)  |
| C53-C54-C55-C56     | -178.3(8)  |
| C61-C54-C55-C56     | 4.4(12)    |
| C53-C54-C55-C60     | -2.4(13)   |
| C61-C54-C55-C60     | -179.7(9)  |
| C60-C55-C56-C57     | 0.0(13)    |
| C54-C55-C56-C57     | 176.0(8)   |
| C55-C56-C57-C58     | -2.2(13)   |
| C56-C57-C58-C59     | 2.4(14)    |
| C57-C58-C59-C60     | -0.4(15)   |
| C58-C59-C60-C55     | -1.6(16)   |
| C58-C59-C60-C51     | -177.9(14) |
| C56-C55-C60-C59     | 1.8(14)    |
| C54-C55-C60-C59     | -174.2(10) |
| C56-C55-C60-C51     | 178.0(13)  |
| C54-C55-C60-C51     | 2.0(17)    |
| C52-C51-C60-C59     | 176.9(15)  |
| C20-C51-C60-C59     | -1(2)      |
| C52-C51-C60-C55     | 1(2)       |
| C20-C51-C60-C55     | -177.4(14) |
| C53-C54-C61-C62     | -94.7(10)  |
| C55-C54-C61-C62     | 82.6(11)   |
| C54-C61-C62-C63     | -179.3(8)  |
| C61-C62-C63-C64     | -79.7(14)  |
| C62-C63-C64-C65     | -157.6(11) |
| C63-C64-C65-C66     | -170.7(12) |
| C21-C20-C51'-C52'   | -63(3)     |

|                     |            |
|---------------------|------------|
| C19-C20-C51'-C52'   | 117(2)     |
| C51-C20-C51'-C52'   | 7(11)      |
| C21-C20-C51'-C60'   | 116(2)     |
| C19-C20-C51'-C60'   | -64(3)     |
| C51-C20-C51'-C60'   | -174(15)   |
| C60'-C51'-C52'-C53' | 5(4)       |
| C20-C51'-C52'-C53'  | -176(2)    |
| C51'-C52'-C53'-C54' | -2(3)      |
| C52'-C53'-C54'-C55' | 0(2)       |
| C52'-C53'-C54'-C61' | -172(3)    |
| C53'-C54'-C55'-C56' | -177.1(14) |
| C61'-C54'-C55'-C56' | -7(3)      |
| C53'-C54'-C55'-C60' | 0(2)       |
| C61'-C54'-C55'-C60' | 171(3)     |
| C60'-C55'-C56'-C57' | 0(2)       |
| C54'-C55'-C56'-C57' | 176.9(13)  |
| C55'-C56'-C57'-C58' | 2(2)       |
| C56'-C57'-C58'-C59' | -3(2)      |
| C57'-C58'-C59'-C60' | 1(2)       |
| C56'-C55'-C60'-C51' | 179(2)     |
| C54'-C55'-C60'-C51' | 2(3)       |
| C56'-C55'-C60'-C59' | -2(2)      |
| C54'-C55'-C60'-C59' | -178.7(15) |
| C52'-C51'-C60'-C55' | -5(4)      |
| C20-C51'-C60'-C55'  | 176(2)     |
| C52'-C51'-C60'-C59' | 176(3)     |
| C20-C51'-C60'-C59'  | -3(4)      |
| C58'-C59'-C60'-C55' | 1(2)       |
| C58'-C59'-C60'-C51' | -180(2)    |
| C53'-C54'-C61'-C62' | -50(7)     |
| C55'-C54'-C61'-C62' | 139(5)     |
| C54'-C61'-C62'-C63' | -122(6)    |
| C61'-C62'-C63'-C64' | -135(7)    |
| C62'-C63'-C64'-C65' | -178(9)    |
| C63'-C64'-C65'-C66' | 55(14)     |
| C61"-C62"-C63"-C64" | 106(3)     |
| C62"-C63"-C64"-C65" | 162(2)     |
| C63"-C64"-C65"-C66" | -88(3)     |

-----  
Symmetry transformations used to generate equivalent atoms:

#1 -x+1, -y+1, -z+2

2.4. 9,20-Bis(4-dodecyl-naphthalen-1-yl)tetrabenzo[*a,c,j,l*]tetracene (**2c**)

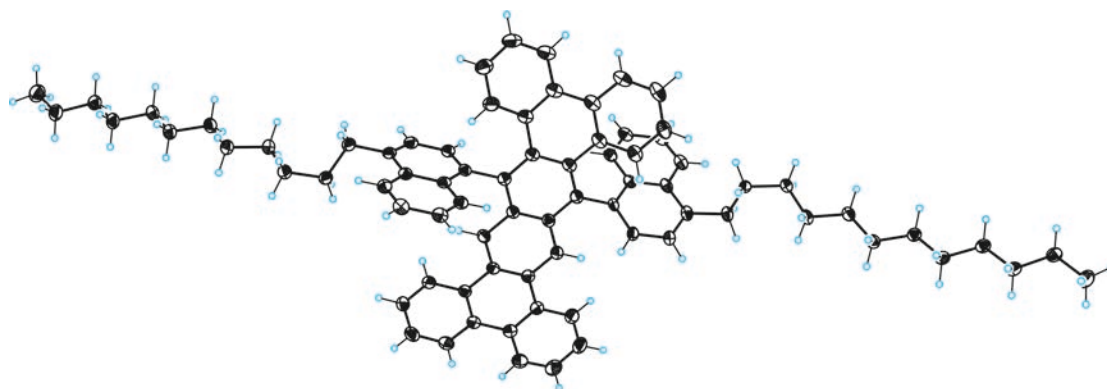

**Table 10.** Crystal data and structure refinement for **2c**.

---

|                                 |                                       |                  |
|---------------------------------|---------------------------------------|------------------|
| —                               |                                       |                  |
| Identification code             | RD393_0m                              |                  |
| Empirical formula               | C78 H81.40                            |                  |
| Formula weight                  | 1018.83                               |                  |
| Temperature                     | 100(2) K                              |                  |
| Wavelength                      | 0.71073 Å                             |                  |
| Crystal system                  | Triclinic                             |                  |
| Space group                     | P-1                                   |                  |
| Unit cell dimensions            | a = 7.6054(2) Å                       | a = 72.252(2) °. |
|                                 | b = 18.7609(6) Å                      | b = 84.027(2)    |
|                                 |                                       | °.               |
|                                 | c = 21.2252(8) Å                      | g = 87.900(2)    |
|                                 |                                       | °.               |
| Volume                          | 2868.67(16) Å <sup>3</sup>            |                  |
| Z                               | 2                                     |                  |
| Density (calculated)            | 1.180 Mg/m <sup>3</sup>               |                  |
| Absorption coefficient          | 0.066 mm <sup>-1</sup>                |                  |
| F(000)                          | 1099                                  |                  |
| Crystal size                    | 0.06 x 0.01 x 0.001 mm <sup>3</sup>   |                  |
| Theta range for data collection | 1.14 to 29.91 °.                      |                  |
| Index ranges                    | -10 <=h<=10, -26 <=k<=26, -29 <=l<=29 |                  |
| Reflections collected           | 25427                                 |                  |

|                                   |                                             |
|-----------------------------------|---------------------------------------------|
| Independent reflections           | 15305 [R(int) = 0.0232 ]                    |
| Completeness to theta =29.91 °    | 92.1%                                       |
| Absorption correction             | Empirical                                   |
| Max. and min. transmission        | 0.9999 and 0.9960                           |
| Refinement method                 | Full-matrix least-squares on F <sup>2</sup> |
| Data / restraints / parameters    | 15305 / 852 / 1103                          |
| Goodness-of-fit on F <sup>2</sup> | 1.013                                       |
| Final R indices [I>2sigma(I)]     | R1 = 0.0603 , wR2 = 0.1406                  |
| R indices (all data)              | R1 = 0.1053 , wR2 = 0.1644                  |
| Largest diff. peak and hole       | 0.355 and -0.295 e.Å <sup>-3</sup>          |

**Table 11.** Bond lengths [Å] and angles [°] for **2c**.

---

Bond lengths----

|          |          |
|----------|----------|
| C1-C34   | 1.414(2) |
| C1-C2    | 1.414(2) |
| C1-C35   | 1.489(3) |
| C1-C35'  | 1.510(5) |
| C2-C15   | 1.433(2) |
| C2-C3    | 1.486(2) |
| C3-C4    | 1.403(2) |
| C3-C8    | 1.422(2) |
| C4-C5    | 1.379(2) |
| C5-C6    | 1.392(3) |
| C6-C7    | 1.363(3) |
| C7-C8    | 1.405(2) |
| C8-C9    | 1.462(2) |
| C9-C14   | 1.400(2) |
| C9-C10   | 1.413(2) |
| C10-C11  | 1.373(3) |
| C11-C12  | 1.380(3) |
| C12-C13  | 1.378(2) |
| C13-C14  | 1.410(2) |
| C14-C15  | 1.476(2) |
| C15-C16  | 1.406(2) |
| C16-C17  | 1.408(2) |
| C16-C57' | 1.471(7) |
| C16-C57  | 1.503(3) |

|         |            |
|---------|------------|
| C17-C34 | 1.400(2)   |
| C17-C18 | 1.468(2)   |
| C18-C19 | 1.457(2)   |
| C19-C32 | 1.382(2)   |
| C19-C20 | 1.454(2)   |
| C20-C21 | 1.412(2)   |
| C20-C25 | 1.415(2)   |
| C21-C22 | 1.375(2)   |
| C22-C23 | 1.387(3)   |
| C23-C24 | 1.368(3)   |
| C24-C25 | 1.413(2)   |
| C25-C26 | 1.454(2)   |
| C26-C27 | 1.412(2)   |
| C26-C31 | 1.418(2)   |
| C27-C28 | 1.368(2)   |
| C28-C29 | 1.393(2)   |
| C29-C30 | 1.377(2)   |
| C30-C31 | 1.408(2)   |
| C31-C32 | 1.4581(19) |
| C32-C33 | 1.464(2)   |
| C33-C34 | 1.479(2)   |
| C35-C44 | 1.372(3)   |
| C35-C36 | 1.426(3)   |
| C36-C37 | 1.413(3)   |
| C36-C41 | 1.432(3)   |
| C37-C38 | 1.381(3)   |
| C38-C39 | 1.399(4)   |
| C39-C40 | 1.368(4)   |
| C40-C41 | 1.421(3)   |
| C41-C42 | 1.430(3)   |
| C42-C43 | 1.369(3)   |
| C42-C45 | 1.512(3)   |
| C43-C44 | 1.411(3)   |
| C45-C46 | 1.535(3)   |
| C46-C47 | 1.521(3)   |
| C47-C48 | 1.529(4)   |
| C48-C49 | 1.527(4)   |
| C49-C50 | 1.523(4)   |

|           |          |
|-----------|----------|
| C50-C51   | 1.526(4) |
| C51-C52   | 1.515(4) |
| C52-C53   | 1.521(4) |
| C53-C54   | 1.518(4) |
| C54-C55   | 1.520(5) |
| C55-C56   | 1.524(5) |
| C35'-C44' | 1.372(4) |
| C35'-C36' | 1.426(4) |
| C36'-C37' | 1.413(5) |
| C36'-C41' | 1.431(4) |
| C37'-C38' | 1.380(4) |
| C38'-C39' | 1.393(5) |
| C39'-C40' | 1.362(5) |
| C40'-C41' | 1.421(5) |
| C41'-C42' | 1.429(5) |
| C42'-C43' | 1.368(5) |
| C42'-C45' | 1.516(6) |
| C43'-C44' | 1.412(5) |
| C45'-C46' | 1.498(6) |
| C46'-C47' | 1.541(6) |
| C47'-C48' | 1.512(7) |
| C48'-C49' | 1.521(8) |
| C49'-C50' | 1.503(7) |
| C50'-C51' | 1.509(8) |
| C51'-C52' | 1.505(8) |
| C52'-C53' | 1.506(8) |
| C53'-C54' | 1.508(8) |
| C54'-C55' | 1.504(9) |
| C55'-C56' | 1.507(9) |
| C57-C66   | 1.372(3) |
| C57-C58   | 1.431(2) |
| C58-C59   | 1.414(3) |
| C58-C63   | 1.427(3) |
| C59-C60   | 1.370(3) |
| C60-C61   | 1.402(4) |
| C61-C62   | 1.367(4) |
| C62-C63   | 1.432(3) |
| C63-C64   | 1.431(3) |

|           |          |
|-----------|----------|
| C64-C65   | 1.373(3) |
| C64-C67   | 1.517(3) |
| C65-C66   | 1.407(3) |
| C67-C68   | 1.553(3) |
| C68-C69   | 1.525(3) |
| C69-C70   | 1.527(3) |
| C70-C71   | 1.537(3) |
| C71-C72   | 1.521(3) |
| C72-C73   | 1.531(3) |
| C73-C74   | 1.528(3) |
| C74-C75   | 1.525(3) |
| C75-C76   | 1.521(3) |
| C76-C77   | 1.527(4) |
| C77-C78   | 1.524(4) |
| C57'-C66' | 1.369(4) |
| C57'-C58' | 1.428(4) |
| C58'-C59' | 1.411(5) |
| C58'-C63' | 1.427(4) |
| C59'-C60' | 1.367(5) |
| C60'-C61' | 1.399(5) |
| C61'-C62' | 1.366(5) |
| C62'-C63' | 1.433(4) |
| C63'-C64' | 1.428(5) |
| C64'-C65' | 1.371(5) |
| C64'-C67' | 1.502(7) |
| C65'-C66' | 1.408(5) |
| C67'-C68' | 1.469(7) |
| C68'-C69' | 1.525(7) |
| C69'-C70' | 1.509(8) |
| C70'-C71' | 1.516(9) |
| C71'-C72' | 1.525(9) |
| C72'-C73' | 1.507(9) |
| C73'-C74' | 1.517(9) |
| C74'-C75' | 1.509(9) |
| C75'-C76' | 1.508(9) |
| C76'-C77' | 1.521(9) |
| C77'-C78' | 1.521(9) |



Angles-----

|              |            |
|--------------|------------|
| C34-C1-C2    | 120.47(14) |
| C34-C1-C35   | 116.6(4)   |
| C2-C1-C35    | 122.8(4)   |
| C34-C1-C35'  | 112.8(10)  |
| C2-C1-C35'   | 126.7(10)  |
| C35-C1-C35'  | 6.5(8)     |
| C1-C2-C15    | 118.43(14) |
| C1-C2-C3     | 123.36(14) |
| C15-C2-C3    | 117.92(13) |
| C4-C3-C8     | 116.72(15) |
| C4-C3-C2     | 124.40(14) |
| C8-C3-C2     | 118.85(15) |
| C5-C4-C3     | 122.64(16) |
| C4-C5-C6     | 119.50(19) |
| C7-C6-C5     | 119.31(17) |
| C6-C7-C8     | 122.10(16) |
| C7-C8-C3     | 118.95(17) |
| C7-C8-C9     | 120.63(15) |
| C3-C8-C9     | 119.82(14) |
| C14-C9-C10   | 118.40(16) |
| C14-C9-C8    | 119.06(14) |
| C10-C9-C8    | 121.98(16) |
| C11-C10-C9   | 121.34(17) |
| C10-C11-C12  | 119.86(16) |
| C13-C12-C11  | 119.90(17) |
| C12-C13-C14  | 121.20(16) |
| C9-C14-C13   | 118.40(14) |
| C9-C14-C15   | 119.13(15) |
| C13-C14-C15  | 122.46(15) |
| C16-C15-C2   | 120.16(13) |
| C16-C15-C14  | 120.74(14) |
| C2-C15-C14   | 119.00(14) |
| C15-C16-C17  | 120.24(14) |
| C15-C16-C57' | 119.7(8)   |
| C17-C16-C57' | 119.9(9)   |
| C15-C16-C57  | 121.4(3)   |
| C17-C16-C57  | 118.2(3)   |

|              |            |
|--------------|------------|
| C57'-C16-C57 | 2.4(6)     |
| C34-C17-C16  | 119.84(14) |
| C34-C17-C18  | 120.69(13) |
| C16-C17-C18  | 119.45(14) |
| C19-C18-C17  | 118.88(14) |
| C32-C19-C20  | 120.65(13) |
| C32-C19-C18  | 121.07(14) |
| C20-C19-C18  | 118.27(14) |
| C21-C20-C25  | 118.57(15) |
| C21-C20-C19  | 121.47(14) |
| C25-C20-C19  | 119.96(14) |
| C22-C21-C20  | 121.40(16) |
| C21-C22-C23  | 119.84(17) |
| C24-C23-C22  | 120.28(17) |
| C23-C24-C25  | 121.52(16) |
| C24-C25-C20  | 118.38(16) |
| C24-C25-C26  | 122.05(14) |
| C20-C25-C26  | 119.54(14) |
| C27-C26-C31  | 118.56(15) |
| C27-C26-C25  | 121.63(15) |
| C31-C26-C25  | 119.77(13) |
| C28-C27-C26  | 121.40(16) |
| C27-C28-C29  | 120.18(15) |
| C30-C29-C28  | 119.95(16) |
| C29-C30-C31  | 121.26(15) |
| C30-C31-C26  | 118.64(13) |
| C30-C31-C32  | 121.55(14) |
| C26-C31-C32  | 119.81(14) |
| C19-C32-C31  | 120.14(14) |
| C19-C32-C33  | 120.73(13) |
| C31-C32-C33  | 119.12(13) |
| C32-C33-C34  | 118.90(14) |
| C17-C34-C1   | 120.38(13) |
| C17-C34-C33  | 119.69(14) |
| C1-C34-C33   | 119.75(14) |
| C44-C35-C36  | 119.3(2)   |
| C44-C35-C1   | 119.9(2)   |
| C36-C35-C1   | 120.8(2)   |

|                |            |
|----------------|------------|
| C37-C36-C35    | 121.2(2)   |
| C37-C36-C41    | 119.2(2)   |
| C35-C36-C41    | 119.6(2)   |
| C38-C37-C36    | 121.2(3)   |
| C37-C38-C39    | 119.5(2)   |
| C40-C39-C38    | 120.9(2)   |
| C39-C40-C41    | 121.4(2)   |
| C40-C41-C42    | 122.7(2)   |
| C40-C41-C36    | 117.8(2)   |
| C42-C41-C36    | 119.6(2)   |
| C43-C42-C41    | 118.6(2)   |
| C43-C42-C45    | 120.8(2)   |
| C41-C42-C45    | 120.6(2)   |
| C42-C43-C44    | 122.0(2)   |
| C35-C44-C43    | 120.9(2)   |
| C42-C45-C46    | 112.58(19) |
| C47-C46-C45    | 113.75(19) |
| C46-C47-C48    | 114.5(2)   |
| C49-C48-C47    | 112.0(2)   |
| C50-C49-C48    | 114.6(3)   |
| C49-C50-C51    | 112.3(3)   |
| C52-C51-C50    | 115.4(3)   |
| C51-C52-C53    | 112.9(3)   |
| C54-C53-C52    | 115.5(3)   |
| C53-C54-C55    | 113.3(3)   |
| C54-C55-C56    | 114.4(4)   |
| C44'-C35'-C36' | 118.8(4)   |
| C44'-C35'-C1   | 121.9(5)   |
| C36'-C35'-C1   | 119.0(4)   |
| C37'-C36'-C35' | 120.7(4)   |
| C37'-C36'-C41' | 119.2(4)   |
| C35'-C36'-C41' | 120.0(4)   |
| C38'-C37'-C36' | 120.5(5)   |
| C37'-C38'-C39' | 120.2(5)   |
| C40'-C39'-C38' | 120.9(5)   |
| C39'-C40'-C41' | 121.2(5)   |
| C40'-C41'-C42' | 122.6(5)   |
| C40'-C41'-C36' | 118.0(4)   |

|                |            |
|----------------|------------|
| C42'-C41'-C36' | 119.4(4)   |
| C43'-C42'-C41' | 118.4(4)   |
| C43'-C42'-C45' | 123.3(4)   |
| C41'-C42'-C45' | 118.2(4)   |
| C42'-C43'-C44' | 122.3(4)   |
| C35'-C44'-C43' | 120.9(4)   |
| C46'-C45'-C42' | 115.8(5)   |
| C45'-C46'-C47' | 111.7(5)   |
| C48'-C47'-C46' | 111.7(5)   |
| C47'-C48'-C49' | 112.8(6)   |
| C50'-C49'-C48' | 113.6(6)   |
| C49'-C50'-C51' | 114.4(7)   |
| C52'-C51'-C50' | 113.7(8)   |
| C51'-C52'-C53' | 113.6(8)   |
| C52'-C53'-C54' | 114.1(8)   |
| C55'-C54'-C53' | 112.8(8)   |
| C54'-C55'-C56' | 113.6(9)   |
| C66-C57-C58    | 118.4(2)   |
| C66-C57-C16    | 120.5(2)   |
| C58-C57-C16    | 121.0(2)   |
| C59-C58-C63    | 119.0(2)   |
| C59-C58-C57    | 121.7(2)   |
| C63-C58-C57    | 119.3(2)   |
| C60-C59-C58    | 121.6(2)   |
| C59-C60-C61    | 119.9(2)   |
| C62-C61-C60    | 120.3(2)   |
| C61-C62-C63    | 121.6(2)   |
| C58-C63-C64    | 119.84(19) |
| C58-C63-C62    | 117.6(2)   |
| C64-C63-C62    | 122.6(2)   |
| C65-C64-C63    | 118.4(2)   |
| C65-C64-C67    | 119.9(2)   |
| C63-C64-C67    | 121.6(2)   |
| C64-C65-C66    | 121.3(2)   |
| C57-C66-C65    | 121.6(2)   |
| C64-C67-C68    | 110.8(2)   |
| C69-C68-C67    | 114.07(19) |
| C68-C69-C70    | 115.6(2)   |

|                |          |
|----------------|----------|
| C69-C70-C71    | 111.6(2) |
| C72-C71-C70    | 116.3(2) |
| C71-C72-C73    | 112.3(2) |
| C74-C73-C72    | 115.7(2) |
| C75-C74-C73    | 112.6(2) |
| C76-C75-C74    | 114.9(2) |
| C75-C76-C77    | 113.3(2) |
| C78-C77-C76    | 113.5(3) |
| C66'-C57'-C58' | 119.4(5) |
| C66'-C57'-C16  | 123.0(6) |
| C58'-C57'-C16  | 117.4(6) |
| C59'-C58'-C63' | 118.9(4) |
| C59'-C58'-C57' | 121.8(5) |
| C63'-C58'-C57' | 119.2(4) |
| C60'-C59'-C58' | 121.7(5) |
| C59'-C60'-C61' | 119.5(5) |
| C62'-C61'-C60' | 120.9(5) |
| C61'-C62'-C63' | 121.0(5) |
| C58'-C63'-C64' | 119.0(4) |
| C58'-C63'-C62' | 117.6(4) |
| C64'-C63'-C62' | 123.4(5) |
| C65'-C64'-C63' | 119.4(5) |
| C65'-C64'-C67' | 120.9(6) |
| C63'-C64'-C67' | 119.5(6) |
| C64'-C65'-C66' | 120.7(5) |
| C57'-C66'-C65' | 121.1(5) |
| C68'-C67'-C64' | 115.4(6) |
| C67'-C68'-C69' | 113.1(6) |
| C70'-C69'-C68' | 111.1(6) |
| C69'-C70'-C71' | 111.2(7) |
| C70'-C71'-C72' | 111.2(8) |
| C73'-C72'-C71' | 111.4(8) |
| C72'-C73'-C74' | 113.0(8) |
| C75'-C74'-C73' | 111.1(8) |
| C76'-C75'-C74' | 113.2(9) |
| C75'-C76'-C77' | 111.5(9) |
| C76'-C77'-C78' | 110.6(9) |

-----

**Table 12.** Torsion angles [°] for **2c**.

---

|                 |             |
|-----------------|-------------|
| C34-C1-C2-C15   | -1.3(2)     |
| C35-C1-C2-C15   | -177.72(17) |
| C35'-C1-C2-C15  | 175.9(3)    |
| C34-C1-C2-C3    | 172.44(13)  |
| C35-C1-C2-C3    | -4.0(2)     |
| C35'-C1-C2-C3   | -10.4(4)    |
| C1-C2-C3-C4     | 17.3(2)     |
| C15-C2-C3-C4    | -168.99(14) |
| C1-C2-C3-C8     | -160.61(13) |
| C15-C2-C3-C8    | 13.1(2)     |
| C8-C3-C4-C5     | 6.9(2)      |
| C2-C3-C4-C5     | -171.02(15) |
| C3-C4-C5-C6     | 0.9(3)      |
| C4-C5-C6-C7     | -5.9(3)     |
| C5-C6-C7-C8     | 2.9(3)      |
| C6-C7-C8-C3     | 5.0(2)      |
| C6-C7-C8-C9     | -166.12(15) |
| C4-C3-C8-C7     | -9.6(2)     |
| C2-C3-C8-C7     | 168.41(14)  |
| C4-C3-C8-C9     | 161.59(14)  |
| C2-C3-C8-C9     | -20.4(2)    |
| C7-C8-C9-C14    | 175.72(15)  |
| C3-C8-C9-C14    | 4.7(2)      |
| C7-C8-C9-C10    | 4.4(2)      |
| C3-C8-C9-C10    | -166.63(14) |
| C14-C9-C10-C11  | -5.7(2)     |
| C8-C9-C10-C11   | 165.64(15)  |
| C9-C10-C11-C12  | -2.3(3)     |
| C10-C11-C12-C13 | 5.0(3)      |
| C11-C12-C13-C14 | 0.3(3)      |
| C10-C9-C14-C13  | 10.8(2)     |
| C8-C9-C14-C13   | -160.84(14) |
| C10-C9-C14-C15  | -170.45(14) |
| C8-C9-C14-C15   | 17.9(2)     |
| C12-C13-C14-C9  | -8.3(2)     |
| C12-C13-C14-C15 | 172.95(15)  |

|                  |             |
|------------------|-------------|
| C1-C2-C15-C16    | 6.8(2)      |
| C3-C2-C15-C16    | -167.25(13) |
| C1-C2-C15-C14    | -176.88(12) |
| C3-C2-C15-C14    | 9.05(19)    |
| C9-C14-C15-C16   | 151.31(14)  |
| C13-C14-C15-C16  | -30.0(2)    |
| C9-C14-C15-C2    | -25.0(2)    |
| C13-C14-C15-C2   | 153.77(15)  |
| C2-C15-C16-C17   | -7.7(2)     |
| C14-C15-C16-C17  | 176.03(13)  |
| C2-C15-C16-C57'  | 166.5(6)    |
| C14-C15-C16-C57' | -9.7(6)     |
| C2-C15-C16-C57   | 168.4(2)    |
| C14-C15-C16-C57  | -7.8(3)     |
| C15-C16-C17-C34  | 3.0(2)      |
| C57'-C16-C17-C34 | -171.3(5)   |
| C57-C16-C17-C34  | -173.3(2)   |
| C15-C16-C17-C18  | -178.51(14) |
| C57'-C16-C17-C18 | 7.2(5)      |
| C57-C16-C17-C18  | 5.2(3)      |
| C34-C17-C18-C19  | -0.8(2)     |
| C16-C17-C18-C19  | -179.23(13) |
| C17-C18-C19-C32  | 2.0(2)      |
| C17-C18-C19-C20  | -177.59(14) |
| C32-C19-C20-C21  | 179.34(14)  |
| C18-C19-C20-C21  | -1.1(2)     |
| C32-C19-C20-C25  | 0.2(2)      |
| C18-C19-C20-C25  | 179.77(14)  |
| C25-C20-C21-C22  | -0.2(2)     |
| C19-C20-C21-C22  | -179.34(16) |
| C20-C21-C22-C23  | -0.8(3)     |
| C21-C22-C23-C24  | 0.9(3)      |
| C22-C23-C24-C25  | 0.1(3)      |
| C23-C24-C25-C20  | -1.1(3)     |
| C23-C24-C25-C26  | 176.94(17)  |
| C21-C20-C25-C24  | 1.1(2)      |
| C19-C20-C25-C24  | -179.74(15) |
| C21-C20-C25-C26  | -176.93(14) |

|                 |             |
|-----------------|-------------|
| C19-C20-C25-C26 | 2.2(2)      |
| C24-C25-C26-C27 | -1.8(2)     |
| C20-C25-C26-C27 | 176.17(14)  |
| C24-C25-C26-C31 | -179.44(15) |
| C20-C25-C26-C31 | -1.5(2)     |
| C31-C26-C27-C28 | 0.4(2)      |
| C25-C26-C27-C28 | -177.28(15) |
| C26-C27-C28-C29 | -0.7(3)     |
| C27-C28-C29-C30 | 0.9(3)      |
| C28-C29-C30-C31 | -0.8(2)     |
| C29-C30-C31-C26 | 0.4(2)      |
| C29-C30-C31-C32 | 179.52(14)  |
| C27-C26-C31-C30 | -0.2(2)     |
| C25-C26-C31-C30 | 177.46(13)  |
| C27-C26-C31-C32 | -179.34(13) |
| C25-C26-C31-C32 | -1.6(2)     |
| C20-C19-C32-C31 | -3.4(2)     |
| C18-C19-C32-C31 | 177.11(13)  |
| C20-C19-C32-C33 | 177.90(13)  |
| C18-C19-C32-C33 | -1.6(2)     |
| C30-C31-C32-C19 | -174.99(14) |
| C26-C31-C32-C19 | 4.1(2)      |
| C30-C31-C32-C33 | 3.8(2)      |
| C26-C31-C32-C33 | -177.16(14) |
| C19-C32-C33-C34 | 0.1(2)      |
| C31-C32-C33-C34 | -178.61(13) |
| C16-C17-C34-C1  | 2.6(2)      |
| C18-C17-C34-C1  | -175.89(13) |
| C16-C17-C34-C33 | 177.78(13)  |
| C18-C17-C34-C33 | -0.7(2)     |
| C2-C1-C34-C17   | -3.4(2)     |
| C35-C1-C34-C17  | 173.24(16)  |
| C35'-C1-C34-C17 | 179.1(3)    |
| C2-C1-C34-C33   | -178.59(13) |
| C35-C1-C34-C33  | -1.9(2)     |
| C35'-C1-C34-C33 | 3.9(3)      |
| C32-C33-C34-C17 | 1.0(2)      |
| C32-C33-C34-C1  | 176.25(13)  |



|                 |           |
|-----------------|-----------|
| C34-C1-C35-C44  | -91.3(6)  |
| C2-C1-C35-C44   | 85.3(6)   |
| C35'-C1-C35-C44 | -146(10)  |
| C34-C1-C35-C36  | 87.4(6)   |
| C2-C1-C35-C36   | -96.0(6)  |
| C35'-C1-C35-C36 | 32(8)     |
| C44-C35-C36-C37 | -179.0(6) |
| C1-C35-C36-C37  | 2.3(9)    |
| C44-C35-C36-C41 | -0.8(9)   |
| C1-C35-C36-C41  | -179.5(5) |
| C35-C36-C37-C38 | 179.7(5)  |
| C41-C36-C37-C38 | 1.5(7)    |
| C36-C37-C38-C39 | -0.9(5)   |
| C37-C38-C39-C40 | -0.3(4)   |
| C38-C39-C40-C41 | 0.9(4)    |
| C39-C40-C41-C42 | -179.4(3) |
| C39-C40-C41-C36 | -0.3(4)   |
| C37-C36-C41-C40 | -0.9(6)   |
| C35-C36-C41-C40 | -179.1(5) |
| C37-C36-C41-C42 | 178.3(4)  |
| C35-C36-C41-C42 | 0.1(7)    |
| C40-C41-C42-C43 | 179.9(2)  |
| C36-C41-C42-C43 | 0.8(4)    |
| C40-C41-C42-C45 | -2.8(4)   |
| C36-C41-C42-C45 | 178.2(3)  |
| C41-C42-C43-C44 | -0.9(3)   |
| C45-C42-C43-C44 | -178.3(2) |
| C36-C35-C44-C43 | 0.7(8)    |
| C1-C35-C44-C43  | 179.4(4)  |
| C42-C43-C44-C35 | 0.1(5)    |
| C43-C42-C45-C46 | 102.5(3)  |
| C41-C42-C45-C46 | -74.8(3)  |
| C42-C45-C46-C47 | 171.5(2)  |
| C45-C46-C47-C48 | 72.6(3)   |
| C46-C47-C48-C49 | 169.7(3)  |
| C47-C48-C49-C50 | -176.2(3) |
| C48-C49-C50-C51 | 169.8(3)  |
| C49-C50-C51-C52 | -177.0(4) |

|                     |            |
|---------------------|------------|
| C50-C51-C52-C53     | 178.4(4)   |
| C51-C52-C53-C54     | 179.1(5)   |
| C52-C53-C54-C55     | 178.1(5)   |
| C53-C54-C55-C56     | 176.9(7)   |
| C34-C1-C35'-C44'    | -83.3(18)  |
| C2-C1-C35'-C44'     | 99.4(18)   |
| C35-C1-C35'-C44'    | 44(7)      |
| C34-C1-C35'-C36'    | 91.4(18)   |
| C2-C1-C35'-C36'     | -85.9(18)  |
| C35-C1-C35'-C36'    | -141(11)   |
| C44'-C35'-C36'-C37' | -179.5(16) |
| C1-C35'-C36'-C37'   | 6(3)       |
| C44'-C35'-C36'-C41' | -3(3)      |
| C1-C35'-C36'-C41'   | -177.6(14) |
| C35'-C36'-C37'-C38' | -179.8(15) |
| C41'-C36'-C37'-C38' | 3.5(19)    |
| C36'-C37'-C38'-C39' | -2.9(16)   |
| C37'-C38'-C39'-C40' | 1.5(13)    |
| C38'-C39'-C40'-C41' | -0.6(13)   |
| C39'-C40'-C41'-C42' | 179.7(8)   |
| C39'-C40'-C41'-C36' | 1.2(14)    |
| C37'-C36'-C41'-C40' | -2.6(18)   |
| C35'-C36'-C41'-C40' | -179.3(15) |
| C37'-C36'-C41'-C42' | 178.9(11)  |
| C35'-C36'-C41'-C42' | 2(2)       |
| C40'-C41'-C42'-C43' | 179.8(7)   |
| C36'-C41'-C42'-C43' | -1.8(13)   |
| C40'-C41'-C42'-C45' | -1.3(11)   |
| C36'-C41'-C42'-C45' | 177.2(9)   |
| C41'-C42'-C43'-C44' | 2.1(10)    |
| C45'-C42'-C43'-C44' | -176.8(6)  |
| C36'-C35'-C44'-C43' | 3(2)       |
| C1-C35'-C44'-C43'   | 177.8(13)  |
| C42'-C43'-C44'-C35' | -2.9(15)   |
| C43'-C42'-C45'-C46' | -2.6(9)    |
| C41'-C42'-C45'-C46' | 178.5(6)   |
| C42'-C45'-C46'-C47' | 176.6(6)   |
| C45'-C46'-C47'-C48' | 177.4(6)   |

|                     |            |
|---------------------|------------|
| C46'-C47'-C48'-C49' | 175.2(8)   |
| C47'-C48'-C49'-C50' | 177.0(9)   |
| C48'-C49'-C50'-C51' | 176.4(10)  |
| C49'-C50'-C51'-C52' | 179.1(12)  |
| C50'-C51'-C52'-C53' | 178.5(13)  |
| C51'-C52'-C53'-C54' | -179.3(14) |
| C52'-C53'-C54'-C55' | 178.2(14)  |
| C53'-C54'-C55'-C56' | 179.7(18)  |
| C15-C16-C57-C66     | 114.4(5)   |
| C17-C16-C57-C66     | -69.3(6)   |
| C57'-C16-C57-C66    | 158(26)    |
| C15-C16-C57-C58     | -62.8(6)   |
| C17-C16-C57-C58     | 113.4(5)   |
| C57'-C16-C57-C58    | -20(25)    |
| C66-C57-C58-C59     | 170.1(6)   |
| C16-C57-C58-C59     | -12.5(9)   |
| C66-C57-C58-C63     | -9.6(8)    |
| C16-C57-C58-C63     | 167.7(4)   |
| C63-C58-C59-C60     | 1.0(8)     |
| C57-C58-C59-C60     | -178.7(5)  |
| C58-C59-C60-C61     | -1.8(7)    |
| C59-C60-C61-C62     | 0.5(5)     |
| C60-C61-C62-C63     | 1.6(5)     |
| C59-C58-C63-C64     | -178.3(4)  |
| C57-C58-C63-C64     | 1.4(7)     |
| C59-C58-C63-C62     | 0.9(6)     |
| C57-C58-C63-C62     | -179.3(5)  |
| C61-C62-C63-C58     | -2.2(5)    |
| C61-C62-C63-C64     | 177.0(3)   |
| C58-C63-C64-C65     | 7.5(5)     |
| C62-C63-C64-C65     | -171.7(3)  |
| C58-C63-C64-C67     | -167.3(4)  |
| C62-C63-C64-C67     | 13.5(5)    |
| C63-C64-C65-C66     | -8.5(5)    |
| C67-C64-C65-C66     | 166.5(3)   |
| C58-C57-C66-C65     | 9.0(8)     |
| C16-C57-C66-C65     | -168.3(4)  |
| C64-C65-C66-C57     | 0.1(7)     |

|                     |            |
|---------------------|------------|
| C65-C64-C67-C68     | -97.2(3)   |
| C63-C64-C67-C68     | 77.6(3)    |
| C64-C67-C68-C69     | -179.5(2)  |
| C67-C68-C69-C70     | -75.9(3)   |
| C68-C69-C70-C71     | 178.8(3)   |
| C69-C70-C71-C72     | 171.6(3)   |
| C70-C71-C72-C73     | -176.7(3)  |
| C71-C72-C73-C74     | 171.5(3)   |
| C72-C73-C74-C75     | -172.8(3)  |
| C73-C74-C75-C76     | -179.0(3)  |
| C74-C75-C76-C77     | -176.7(4)  |
| C75-C76-C77-C78     | -177.9(4)  |
| C15-C16-C57'-C66'   | 108.6(17)  |
| C17-C16-C57'-C66'   | -77(2)     |
| C57-C16-C57'-C66'   | -29(24)    |
| C15-C16-C57'-C58'   | -65.1(19)  |
| C17-C16-C57'-C58'   | 109.2(16)  |
| C57-C16-C57'-C58'   | 157(27)    |
| C66'-C57'-C58'-C59' | 177.0(18)  |
| C16-C57'-C58'-C59'  | -9(3)      |
| C66'-C57'-C58'-C63' | -6(3)      |
| C16-C57'-C58'-C63'  | 167.9(15)  |
| C63'-C58'-C59'-C60' | 7(3)       |
| C57'-C58'-C59'-C60' | -176.4(18) |
| C58'-C59'-C60'-C61' | -4(2)      |
| C59'-C60'-C61'-C62' | -1.8(17)   |
| C60'-C61'-C62'-C63' | 4.3(17)    |
| C59'-C58'-C63'-C64' | 173.8(15)  |
| C57'-C58'-C63'-C64' | -3(3)      |
| C59'-C58'-C63'-C62' | -4(2)      |
| C57'-C58'-C63'-C62' | 178.9(17)  |
| C61'-C62'-C63'-C58' | -1(2)      |
| C61'-C62'-C63'-C64' | -179.0(13) |
| C58'-C63'-C64'-C65' | 11(2)      |
| C62'-C63'-C64'-C65' | -171.5(13) |
| C58'-C63'-C64'-C67' | -164.8(14) |
| C62'-C63'-C64'-C67' | 13(2)      |
| C63'-C64'-C65'-C66' | -9(2)      |

|                     |            |
|---------------------|------------|
| C67'-C64'-C65'-C66' | 166.3(13)  |
| C58'-C57'-C66'-C65' | 8(3)       |
| C16-C57'-C66'-C65'  | -165.7(15) |
| C64'-C65'-C66'-C57' | 0(2)       |
| C65'-C64'-C67'-C68' | -16.5(17)  |
| C63'-C64'-C67'-C68' | 158.9(12)  |
| C64'-C67'-C68'-C69' | -174.4(10) |
| C67'-C68'-C69'-C70' | -170.5(11) |
| C68'-C69'-C70'-C71' | 179.5(13)  |
| C69'-C70'-C71'-C72' | -177.4(15) |
| C70'-C71'-C72'-C73' | 178.6(16)  |
| C71'-C72'-C73'-C74' | 178.3(17)  |
| C72'-C73'-C74'-C75' | -177.4(18) |
| C73'-C74'-C75'-C76' | 178.6(19)  |
| C74'-C75'-C76'-C77' | -175(2)    |
| C75'-C76'-C77'-C78' | -168(2)    |

2.5. 9,20-Di(phenanthren-9-yl)tetrabenzo[*a,c,j,l*]tetracene (**2d**)

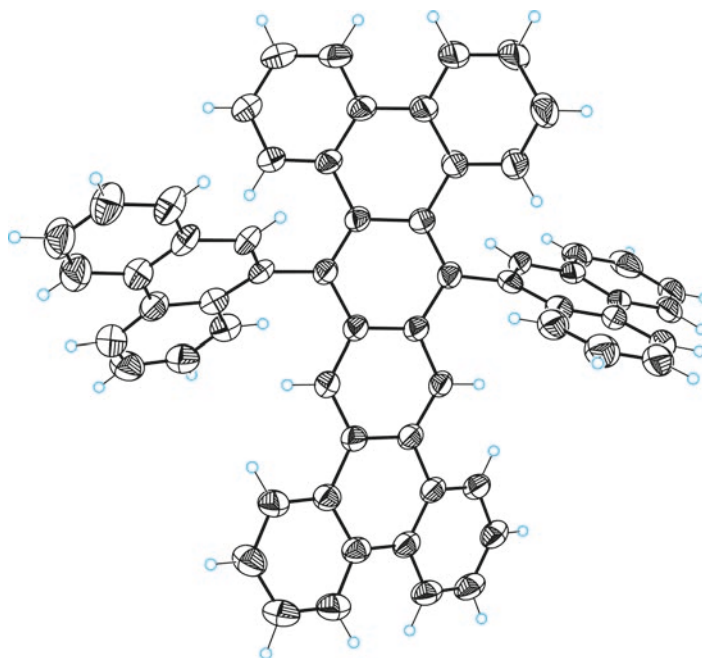

**Table 13.** Crystal data and structure refinement for **2d**.

|                     |             |
|---------------------|-------------|
| Identification code | mo_RD566_0m |
| Empirical formula   | C62 H36     |
| Formula weight      | 780.91      |

|                                   |                                             |                 |
|-----------------------------------|---------------------------------------------|-----------------|
| Temperature                       | 100(2) K                                    |                 |
| Wavelength                        | 0.71073 Å                                   |                 |
| Crystal system                    | Triclinic                                   |                 |
| Space group                       | P-1                                         |                 |
| Unit cell dimensions              | a = 10.1459(4)Å                             | a =             |
| 66.7820(10)°.                     | b = 14.0677(6)Å                             | b = 77.518(2)°. |
|                                   | c = 15.4819(7)Å                             | g = 85.704(2)°. |
| Volume                            | 1982.63(15) Å <sup>3</sup>                  |                 |
| Z                                 | 2                                           |                 |
| Density (calculated)              | 1.308 Mg/m <sup>3</sup>                     |                 |
| Absorption coefficient            | 0.074 mm <sup>-1</sup>                      |                 |
| F(000)                            | 816                                         |                 |
| Crystal size                      | 0.30 x 0.10 x 0.02 mm <sup>3</sup>          |                 |
| Theta range for data collection   | 1.575 to 25.998°.                           |                 |
| Index ranges                      | -11<=h<=12,-16<=k<=17,-19<=l<=19            |                 |
| Reflections collected             | 22068                                       |                 |
| Independent reflections           | 7717[R(int) = 0.0255]                       |                 |
| Completeness to theta =25.998°    | 99.0%                                       |                 |
| Absorption correction             | Empirical                                   |                 |
| Max. and min. transmission        | 0.998 and 0.919                             |                 |
| Refinement method                 | Full-matrix least-squares on F <sup>2</sup> |                 |
| Data / restraints / parameters    | 7717/ 948/ 811                              |                 |
| Goodness-of-fit on F <sup>2</sup> | 1.036                                       |                 |
| Final R indices [I>2sigma(I)]     | R1 = 0.0538, wR2 = 0.1433                   |                 |
| R indices (all data)              | R1 = 0.0763, wR2 = 0.1594                   |                 |
| Largest diff. peak and hole       | 0.332 and -0.267 e.Å <sup>-3</sup>          |                 |

**Table 14.** Bond lengths [Å] and angles [°] for **2d**.

---

|                  |          |
|------------------|----------|
| Bond lengths---- |          |
| C1-C7            | 1.411(3) |
| C1-C2            | 1.424(3) |
| C1-C6            | 1.425(3) |
| C2-C22           | 1.413(3) |
| C2-C3            | 1.420(3) |
| C3-C4            | 1.390(3) |
| C3-C35           | 1.461(7) |

|         |           |
|---------|-----------|
| C3-C35' | 1.545(10) |
| C4-C5   | 1.443(3)  |
| C4-C23  | 1.480(3)  |
| C5-C6   | 1.395(3)  |
| C5-C34  | 1.476(3)  |
| C6-C49  | 1.498(8)  |
| C6-C49' | 1.504(11) |
| C7-C8   | 1.384(3)  |
| C8-C21  | 1.426(3)  |
| C8-C9   | 1.470(3)  |
| C9-C10  | 1.397(3)  |
| C9-C14  | 1.411(3)  |
| C10-C11 | 1.374(3)  |
| C11-C12 | 1.378(3)  |
| C12-C13 | 1.372(3)  |
| C13-C14 | 1.402(3)  |
| C14-C15 | 1.468(3)  |
| C15-C20 | 1.400(3)  |
| C15-C16 | 1.407(3)  |
| C16-C17 | 1.371(3)  |
| C17-C18 | 1.373(3)  |
| C18-C19 | 1.378(3)  |
| C19-C20 | 1.402(3)  |
| C20-C21 | 1.471(3)  |
| C21-C22 | 1.377(3)  |
| C23-C24 | 1.402(3)  |
| C23-C28 | 1.411(3)  |
| C24-C25 | 1.380(3)  |
| C25-C26 | 1.379(4)  |
| C26-C27 | 1.374(4)  |
| C27-C28 | 1.400(3)  |
| C28-C29 | 1.461(3)  |
| C29-C30 | 1.402(3)  |
| C29-C34 | 1.408(3)  |
| C30-C31 | 1.366(3)  |
| C31-C32 | 1.391(3)  |
| C32-C33 | 1.370(3)  |
| C33-C34 | 1.402(3)  |

|           |           |
|-----------|-----------|
| C35-C48   | 1.353(5)  |
| C35-C36   | 1.453(5)  |
| C36-C37   | 1.409(6)  |
| C36-C41   | 1.422(6)  |
| C37-C38   | 1.375(6)  |
| C38-C39   | 1.387(7)  |
| C39-C40   | 1.380(7)  |
| C40-C41   | 1.417(6)  |
| C41-C42   | 1.441(7)  |
| C42-C43   | 1.414(5)  |
| C42-C47   | 1.422(6)  |
| C43-C44   | 1.345(8)  |
| C44-C45   | 1.427(8)  |
| C45-C46   | 1.386(6)  |
| C46-C47   | 1.404(6)  |
| C47-C48   | 1.433(5)  |
| C35'-C48' | 1.353(6)  |
| C35'-C36' | 1.451(6)  |
| C36'-C37' | 1.405(7)  |
| C36'-C41' | 1.421(7)  |
| C37'-C38' | 1.368(7)  |
| C38'-C39' | 1.399(8)  |
| C39'-C40' | 1.374(8)  |
| C40'-C41' | 1.423(8)  |
| C41'-C42' | 1.441(7)  |
| C42'-C43' | 1.416(6)  |
| C42'-C47' | 1.418(7)  |
| C43'-C44' | 1.364(9)  |
| C44'-C45' | 1.437(10) |
| C45'-C46' | 1.387(8)  |
| C46'-C47' | 1.407(7)  |
| C47'-C48' | 1.433(7)  |
| C49-C62   | 1.375(5)  |
| C49-C50   | 1.440(5)  |
| C50-C51   | 1.399(5)  |
| C50-C55   | 1.427(6)  |
| C51-C52   | 1.390(6)  |
| C52-C53   | 1.374(6)  |



|           |          |
|-----------|----------|
| C53-C54   | 1.380(6) |
| C54-C55   | 1.412(5) |
| C55-C56   | 1.455(5) |
| C56-C57   | 1.410(5) |
| C56-C61   | 1.414(5) |
| C57-C58   | 1.377(6) |
| C58-C59   | 1.383(6) |
| C59-C60   | 1.361(5) |
| C60-C61   | 1.399(5) |
| C61-C62   | 1.429(6) |
| C49'-C62' | 1.372(6) |
| C49'-C50' | 1.445(6) |
| C50'-C51' | 1.404(6) |
| C50'-C55' | 1.428(6) |
| C51'-C52' | 1.392(6) |
| C52'-C53' | 1.381(7) |
| C53'-C54' | 1.379(7) |
| C54'-C55' | 1.414(6) |
| C55'-C56' | 1.460(6) |
| C56'-C57' | 1.416(7) |
| C56'-C61' | 1.418(7) |
| C57'-C58' | 1.387(8) |
| C58'-C59' | 1.380(8) |
| C59'-C60' | 1.363(7) |
| C60'-C61' | 1.397(7) |
| C61'-C62' | 1.426(7) |

Angles-----

|            |            |
|------------|------------|
| C7-C1-C2   | 117.80(17) |
| C7-C1-C6   | 122.96(17) |
| C2-C1-C6   | 119.22(17) |
| C22-C2-C3  | 122.28(17) |
| C22-C2-C1  | 118.02(17) |
| C3-C2-C1   | 119.68(17) |
| C4-C3-C2   | 119.73(17) |
| C4-C3-C35  | 125.1(6)   |
| C2-C3-C35  | 115.0(6)   |
| C4-C3-C35' | 122.5(8)   |

|             |            |
|-------------|------------|
| C2-C3-C35'  | 117.7(8)   |
| C3-C4-C5    | 118.89(17) |
| C3-C4-C23   | 123.93(17) |
| C5-C4-C23   | 116.97(16) |
| C6-C5-C4    | 119.54(17) |
| C6-C5-C34   | 123.25(17) |
| C4-C5-C34   | 117.12(17) |
| C5-C6-C1    | 119.21(17) |
| C5-C6-C49   | 122.6(8)   |
| C1-C6-C49   | 117.8(8)   |
| C5-C6-C49'  | 119.6(11)  |
| C1-C6-C49'  | 120.8(12)  |
| C8-C7-C1    | 122.91(18) |
| C7-C8-C21   | 118.27(18) |
| C7-C8-C9    | 122.36(18) |
| C21-C8-C9   | 119.31(17) |
| C10-C9-C14  | 118.69(18) |
| C10-C9-C8   | 121.88(18) |
| C14-C9-C8   | 119.30(18) |
| C11-C10-C9  | 121.8(2)   |
| C10-C11-C12 | 119.6(2)   |
| C13-C12-C11 | 120.0(2)   |
| C12-C13-C14 | 121.8(2)   |
| C13-C14-C9  | 118.1(2)   |
| C13-C14-C15 | 122.03(18) |
| C9-C14-C15  | 119.88(18) |
| C20-C15-C16 | 118.32(19) |
| C20-C15-C14 | 120.25(17) |
| C16-C15-C14 | 121.40(19) |
| C17-C16-C15 | 121.4(2)   |
| C16-C17-C18 | 120.29(19) |
| C17-C18-C19 | 119.7(2)   |
| C18-C19-C20 | 121.2(2)   |
| C15-C20-C19 | 119.04(18) |
| C15-C20-C21 | 119.31(18) |
| C19-C20-C21 | 121.55(18) |
| C22-C21-C8  | 118.80(17) |
| C22-C21-C20 | 121.79(18) |

|             |            |
|-------------|------------|
| C8-C21-C20  | 119.40(17) |
| C21-C22-C2  | 122.72(18) |
| C24-C23-C28 | 117.96(18) |
| C24-C23-C4  | 121.60(19) |
| C28-C23-C4  | 119.85(18) |
| C25-C24-C23 | 121.8(2)   |
| C26-C25-C24 | 119.9(2)   |
| C27-C26-C25 | 119.7(2)   |
| C26-C27-C28 | 121.6(2)   |
| C27-C28-C23 | 119.0(2)   |
| C27-C28-C29 | 121.5(2)   |
| C23-C28-C29 | 119.41(18) |
| C30-C29-C34 | 119.4(2)   |
| C30-C29-C28 | 121.38(19) |
| C34-C29-C28 | 119.20(19) |
| C31-C30-C29 | 121.2(2)   |
| C30-C31-C32 | 119.8(2)   |
| C33-C32-C31 | 120.0(2)   |
| C32-C33-C34 | 121.66(19) |
| C33-C34-C29 | 117.92(18) |
| C33-C34-C5  | 121.57(17) |
| C29-C34-C5  | 120.10(18) |
| C48-C35-C36 | 119.2(6)   |
| C48-C35-C3  | 116.5(5)   |
| C36-C35-C3  | 124.3(5)   |
| C37-C36-C41 | 119.7(5)   |
| C37-C36-C35 | 120.7(5)   |
| C41-C36-C35 | 119.6(5)   |
| C38-C37-C36 | 121.4(6)   |
| C37-C38-C39 | 119.5(6)   |
| C40-C39-C38 | 120.6(5)   |
| C39-C40-C41 | 121.6(5)   |
| C40-C41-C36 | 117.2(5)   |
| C40-C41-C42 | 123.0(5)   |
| C36-C41-C42 | 119.8(4)   |
| C43-C42-C47 | 117.7(5)   |
| C43-C42-C41 | 123.0(5)   |
| C47-C42-C41 | 119.2(4)   |

|                |          |
|----------------|----------|
| C44-C43-C42    | 121.4(6) |
| C43-C44-C45    | 120.8(5) |
| C46-C45-C44    | 119.9(6) |
| C45-C46-C47    | 119.0(5) |
| C46-C47-C42    | 121.2(5) |
| C46-C47-C48    | 119.9(5) |
| C42-C47-C48    | 118.9(5) |
| C35-C48-C47    | 122.9(6) |
| C48'-C35'-C36' | 120.7(7) |
| C48'-C35'-C3   | 122.5(7) |
| C36'-C35'-C3   | 115.7(7) |
| C37'-C36'-C41' | 119.6(6) |
| C37'-C36'-C35' | 120.8(6) |
| C41'-C36'-C35' | 119.5(6) |
| C38'-C37'-C36' | 121.6(7) |
| C37'-C38'-C39' | 118.9(7) |
| C40'-C39'-C38' | 121.7(7) |
| C39'-C40'-C41' | 120.1(7) |
| C36'-C41'-C40' | 118.0(6) |
| C36'-C41'-C42' | 118.6(6) |
| C40'-C41'-C42' | 123.3(6) |
| C43'-C42'-C47' | 117.4(6) |
| C43'-C42'-C41' | 121.9(7) |
| C47'-C42'-C41' | 120.7(5) |
| C44'-C43'-C42' | 120.4(7) |
| C43'-C44'-C45' | 122.3(7) |
| C46'-C45'-C44' | 118.0(7) |
| C45'-C46'-C47' | 119.7(7) |
| C46'-C47'-C42' | 122.2(6) |
| C46'-C47'-C48' | 119.0(7) |
| C42'-C47'-C48' | 118.8(5) |
| C35'-C48'-C47' | 121.6(7) |
| C62-C49-C50    | 119.7(5) |
| C62-C49-C6     | 117.5(5) |
| C50-C49-C6     | 122.7(5) |
| C51-C50-C55    | 118.5(5) |
| C51-C50-C49    | 121.6(5) |
| C55-C50-C49    | 119.9(5) |

|                |          |
|----------------|----------|
| C52-C51-C50    | 120.7(6) |
| C53-C52-C51    | 121.1(6) |
| C52-C53-C54    | 119.8(6) |
| C53-C54-C55    | 120.9(6) |
| C54-C55-C50    | 118.9(5) |
| C54-C55-C56    | 122.3(5) |
| C50-C55-C56    | 118.8(5) |
| C57-C56-C61    | 117.5(5) |
| C57-C56-C55    | 122.5(5) |
| C61-C56-C55    | 120.0(5) |
| C58-C57-C56    | 120.9(5) |
| C57-C58-C59    | 121.0(5) |
| C60-C59-C58    | 119.3(5) |
| C59-C60-C61    | 121.6(5) |
| C60-C61-C56    | 119.7(5) |
| C60-C61-C62    | 121.1(5) |
| C56-C61-C62    | 119.2(5) |
| C49-C62-C61    | 122.0(6) |
| C62'-C49'-C50' | 119.3(7) |
| C62'-C49'-C6   | 116.4(7) |
| C50'-C49'-C6   | 124.0(8) |
| C51'-C50'-C55' | 119.7(6) |
| C51'-C50'-C49' | 120.8(6) |
| C55'-C50'-C49' | 119.4(6) |
| C52'-C51'-C50' | 121.2(7) |
| C53'-C52'-C51' | 119.2(7) |
| C54'-C53'-C52' | 120.7(7) |
| C53'-C54'-C55' | 122.0(6) |
| C54'-C55'-C50' | 116.9(6) |
| C54'-C55'-C56' | 123.2(6) |
| C50'-C55'-C56' | 119.9(6) |
| C57'-C56'-C61' | 116.8(6) |
| C57'-C56'-C55' | 124.3(6) |
| C61'-C56'-C55' | 118.7(6) |
| C58'-C57'-C56' | 120.4(7) |
| C59'-C58'-C57' | 121.4(7) |
| C60'-C59'-C58' | 119.7(8) |
| C59'-C60'-C61' | 120.7(8) |

|                |          |
|----------------|----------|
| C60'-C61'-C56' | 121.0(7) |
| C60'-C61'-C62' | 119.6(7) |
| C56'-C61'-C62' | 119.3(7) |
| C49'-C62'-C61' | 122.6(8) |

-----  
**Table 15.** Torsion angles [°] for **2d**.

---

|                |             |
|----------------|-------------|
| C7-C1-C2-C22   | 10.7(3)     |
| C6-C1-C2-C22   | -167.73(18) |
| C7-C1-C2-C3    | -167.73(19) |
| C6-C1-C2-C3    | 13.9(3)     |
| C22-C2-C3-C4   | 175.33(19)  |
| C1-C2-C3-C4    | -6.4(3)     |
| C22-C2-C3-C35  | 0.1(4)      |
| C1-C2-C3-C35   | 178.4(4)    |
| C22-C2-C3-C35' | -2.6(5)     |
| C1-C2-C3-C35'  | 175.7(5)    |
| C2-C3-C4-C5    | -11.0(3)    |
| C35-C3-C4-C5   | 163.7(4)    |
| C35'-C3-C4-C5  | 166.9(5)    |
| C2-C3-C4-C23   | 163.57(19)  |
| C35-C3-C4-C23  | -21.7(5)    |
| C35'-C3-C4-C23 | -18.6(6)    |
| C3-C4-C5-C6    | 21.3(3)     |
| C23-C4-C5-C6   | -153.65(19) |
| C3-C4-C5-C34   | -155.36(18) |
| C23-C4-C5-C34  | 29.7(3)     |
| C4-C5-C6-C1    | -13.7(3)    |
| C34-C5-C6-C1   | 162.71(18)  |
| C4-C5-C6-C49   | 158.4(7)    |
| C34-C5-C6-C49  | -25.2(7)    |
| C4-C5-C6-C49'  | 159.4(8)    |
| C34-C5-C6-C49' | -24.2(9)    |
| C7-C1-C6-C5    | 178.03(19)  |
| C2-C1-C6-C5    | -3.7(3)     |
| C7-C1-C6-C49   | 5.6(6)      |
| C2-C1-C6-C49   | -176.1(6)   |
| C7-C1-C6-C49'  | 5.0(8)      |

|                 |             |
|-----------------|-------------|
| C2-C1-C6-C49'   | -176.7(7)   |
| C2-C1-C7-C8     | -6.7(3)     |
| C6-C1-C7-C8     | 171.64(19)  |
| C1-C7-C8-C21    | -4.5(3)     |
| C1-C7-C8-C9     | 172.71(19)  |
| C7-C8-C9-C10    | -5.7(3)     |
| C21-C8-C9-C10   | 171.5(2)    |
| C7-C8-C9-C14    | 178.42(19)  |
| C21-C8-C9-C14   | -4.4(3)     |
| C14-C9-C10-C11  | 1.4(3)      |
| C8-C9-C10-C11   | -174.5(2)   |
| C9-C10-C11-C12  | 2.0(4)      |
| C10-C11-C12-C13 | -3.0(4)     |
| C11-C12-C13-C14 | 0.7(4)      |
| C12-C13-C14-C9  | 2.6(3)      |
| C12-C13-C14-C15 | -175.3(2)   |
| C10-C9-C14-C13  | -3.6(3)     |
| C8-C9-C14-C13   | 172.46(19)  |
| C10-C9-C14-C15  | 174.37(19)  |
| C8-C9-C14-C15   | -9.6(3)     |
| C13-C14-C15-C20 | -169.6(2)   |
| C9-C14-C15-C20  | 12.6(3)     |
| C13-C14-C15-C16 | 12.2(3)     |
| C9-C14-C15-C16  | -165.6(2)   |
| C20-C15-C16-C17 | -0.7(3)     |
| C14-C15-C16-C17 | 177.6(2)    |
| C15-C16-C17-C18 | 0.6(3)      |
| C16-C17-C18-C19 | -0.5(3)     |
| C17-C18-C19-C20 | 0.5(3)      |
| C16-C15-C20-C19 | 0.7(3)      |
| C14-C15-C20-C19 | -177.59(18) |
| C16-C15-C20-C21 | 176.93(18)  |
| C14-C15-C20-C21 | -1.3(3)     |
| C18-C19-C20-C15 | -0.6(3)     |
| C18-C19-C20-C21 | -176.76(19) |
| C7-C8-C21-C22   | 11.5(3)     |
| C9-C8-C21-C22   | -165.80(18) |
| C7-C8-C21-C20   | -167.14(18) |

|                 |             |
|-----------------|-------------|
| C9-C8-C21-C20   | 15.6(3)     |
| C15-C20-C21-C22 | 168.71(19)  |
| C19-C20-C21-C22 | -15.1(3)    |
| C15-C20-C21-C8  | -12.7(3)    |
| C19-C20-C21-C8  | 163.44(19)  |
| C8-C21-C22-C2   | -7.5(3)     |
| C20-C21-C22-C2  | 171.13(19)  |
| C3-C2-C22-C21   | 174.56(19)  |
| C1-C2-C22-C21   | -3.8(3)     |
| C3-C4-C23-C24   | -21.5(3)    |
| C5-C4-C23-C24   | 153.1(2)    |
| C3-C4-C23-C28   | 167.5(2)    |
| C5-C4-C23-C28   | -17.9(3)    |
| C28-C23-C24-C25 | -0.5(4)     |
| C4-C23-C24-C25  | -171.6(2)   |
| C23-C24-C25-C26 | -0.7(5)     |
| C24-C25-C26-C27 | 1.1(5)      |
| C25-C26-C27-C28 | -0.4(5)     |
| C26-C27-C28-C23 | -0.8(4)     |
| C26-C27-C28-C29 | 177.9(3)    |
| C24-C23-C28-C27 | 1.2(3)      |
| C4-C23-C28-C27  | 172.5(2)    |
| C24-C23-C28-C29 | -177.6(2)   |
| C4-C23-C28-C29  | -6.2(3)     |
| C27-C28-C29-C30 | 19.9(3)     |
| C23-C28-C29-C30 | -161.4(2)   |
| C27-C28-C29-C34 | -160.5(2)   |
| C23-C28-C29-C34 | 18.3(3)     |
| C34-C29-C30-C31 | 1.5(3)      |
| C28-C29-C30-C31 | -178.8(2)   |
| C29-C30-C31-C32 | -2.1(3)     |
| C30-C31-C32-C33 | 0.1(3)      |
| C31-C32-C33-C34 | 2.6(3)      |
| C32-C33-C34-C29 | -3.1(3)     |
| C32-C33-C34-C5  | -175.81(19) |
| C30-C29-C34-C33 | 1.1(3)      |
| C28-C29-C34-C33 | -178.58(18) |
| C30-C29-C34-C5  | 173.89(18)  |



|                 |            |
|-----------------|------------|
| C28-C29-C34-C5  | -5.8(3)    |
| C6-C5-C34-C33   | -22.3(3)   |
| C4-C5-C34-C33   | 154.18(19) |
| C6-C5-C34-C29   | 165.17(19) |
| C4-C5-C34-C29   | -18.3(3)   |
| C4-C3-C35-C48   | -69.3(14)  |
| C2-C3-C35-C48   | 105.6(12)  |
| C35'-C3-C35-C48 | -116(14)   |
| C4-C3-C35-C36   | 111.7(14)  |
| C2-C3-C35-C36   | -73.4(16)  |
| C35'-C3-C35-C36 | 65(12)     |
| C48-C35-C36-C37 | 173.6(15)  |
| C3-C35-C36-C37  | -7(2)      |
| C48-C35-C36-C41 | -5(2)      |
| C3-C35-C36-C41  | 174.0(13)  |
| C41-C36-C37-C38 | 0(2)       |
| C35-C36-C37-C38 | -178.7(14) |
| C36-C37-C38-C39 | -0.1(16)   |
| C37-C38-C39-C40 | -0.2(11)   |
| C38-C39-C40-C41 | 0.7(11)    |
| C39-C40-C41-C36 | -0.8(14)   |
| C39-C40-C41-C42 | 178.5(9)   |
| C37-C36-C41-C40 | 1(2)       |
| C35-C36-C41-C40 | 179.2(13)  |
| C37-C36-C41-C42 | -178.8(13) |
| C35-C36-C41-C42 | 0(2)       |
| C40-C41-C42-C43 | 2.7(14)    |
| C36-C41-C42-C43 | -178.1(11) |
| C40-C41-C42-C47 | -175.1(8)  |
| C36-C41-C42-C47 | 4.2(15)    |
| C47-C42-C43-C44 | 1.1(10)    |
| C41-C42-C43-C44 | -176.7(8)  |
| C42-C43-C44-C45 | -0.5(10)   |
| C43-C44-C45-C46 | -1.2(9)    |
| C44-C45-C46-C47 | 2.3(8)     |
| C45-C46-C47-C42 | -1.7(10)   |
| C45-C46-C47-C48 | 179.3(8)   |
| C43-C42-C47-C46 | 0.1(11)    |

|                     |            |
|---------------------|------------|
| C41-C42-C47-C46     | 178.0(8)   |
| C43-C42-C47-C48     | 179.0(9)   |
| C41-C42-C47-C48     | -3.1(13)   |
| C36-C35-C48-C47     | 6(2)       |
| C3-C35-C48-C47      | -172.8(11) |
| C46-C47-C48-C35     | 176.7(12)  |
| C42-C47-C48-C35     | -2.3(18)   |
| C4-C3-C35'-C48'     | -79(2)     |
| C2-C3-C35'-C48'     | 99.2(18)   |
| C35-C3-C35'-C48'    | 57(12)     |
| C4-C3-C35'-C36'     | 112.8(17)  |
| C2-C3-C35'-C36'     | -69.4(19)  |
| C35-C3-C35'-C36'    | -112(14)   |
| C48'-C35'-C36'-C37' | 178(2)     |
| C3-C35'-C36'-C37'   | -13(3)     |
| C48'-C35'-C36'-C41' | 1(3)       |
| C3-C35'-C36'-C41'   | 169.9(17)  |
| C41'-C36'-C37'-C38' | 1(3)       |
| C35'-C36'-C37'-C38' | -176(2)    |
| C36'-C37'-C38'-C39' | -1(2)      |
| C37'-C38'-C39'-C40' | 1.7(16)    |
| C38'-C39'-C40'-C41' | -2.2(16)   |
| C37'-C36'-C41'-C40' | -1(3)      |
| C35'-C36'-C41'-C40' | 175.8(19)  |
| C37'-C36'-C41'-C42' | -177.9(19) |
| C35'-C36'-C41'-C42' | -1(3)      |
| C39'-C40'-C41'-C36' | 2(2)       |
| C39'-C40'-C41'-C42' | 178.5(13)  |
| C36'-C41'-C42'-C43' | 180.0(16)  |
| C40'-C41'-C42'-C43' | 3(2)       |
| C36'-C41'-C42'-C47' | 1(2)       |
| C40'-C41'-C42'-C47' | -175.3(12) |
| C47'-C42'-C43'-C44' | -0.3(14)   |
| C41'-C42'-C43'-C44' | -178.9(11) |
| C42'-C43'-C44'-C45' | 0.2(13)    |
| C43'-C44'-C45'-C46' | 0.9(13)    |
| C44'-C45'-C46'-C47' | -1.9(13)   |
| C45'-C46'-C47'-C42' | 1.9(14)    |

|                     |            |
|---------------------|------------|
| C45'-C46'-C47'-C48' | -178.5(12) |
| C43'-C42'-C47'-C46' | -0.8(16)   |
| C41'-C42'-C47'-C46' | 177.8(12)  |
| C43'-C42'-C47'-C48' | 179.6(12)  |
| C41'-C42'-C47'-C48' | -1.7(19)   |
| C36'-C35'-C48'-C47' | -1(3)      |
| C3-C35'-C48'-C47'   | -169.4(15) |
| C46'-C47'-C48'-C35' | -177.8(16) |
| C42'-C47'-C48'-C35' | 2(2)       |
| C5-C6-C49-C62       | -55(2)     |
| C1-C6-C49-C62       | 116.7(16)  |
| C49'-C6-C49-C62     | -72(16)    |
| C5-C6-C49-C50       | 124.3(16)  |
| C1-C6-C49-C50       | -63(2)     |
| C49'-C6-C49-C50     | 108(18)    |
| C62-C49-C50-C51     | 176(2)     |
| C6-C49-C50-C51      | -4(3)      |
| C62-C49-C50-C55     | -8(3)      |
| C6-C49-C50-C55      | 172.3(15)  |
| C55-C50-C51-C52     | -2(3)      |
| C49-C50-C51-C52     | 174.6(18)  |
| C50-C51-C52-C53     | 0(2)       |
| C51-C52-C53-C54     | 0.7(16)    |
| C52-C53-C54-C55     | 0.7(13)    |
| C53-C54-C55-C50     | -2.5(16)   |
| C53-C54-C55-C56     | 176.5(9)   |
| C51-C50-C55-C54     | 3(2)       |
| C49-C50-C55-C54     | -173.4(15) |
| C51-C50-C55-C56     | -176.1(15) |
| C49-C50-C55-C56     | 8(2)       |
| C54-C55-C56-C57     | -3.7(16)   |
| C50-C55-C56-C57     | 175.3(13)  |
| C54-C55-C56-C61     | 177.8(12)  |
| C50-C55-C56-C61     | -3.2(18)   |
| C61-C56-C57-C58     | -0.2(14)   |
| C55-C56-C57-C58     | -178.8(9)  |
| C56-C57-C58-C59     | -0.5(11)   |
| C57-C58-C59-C60     | 0.4(12)    |

|                     |            |
|---------------------|------------|
| C58-C59-C60-C61     | 0.4(18)    |
| C59-C60-C61-C56     | -1(2)      |
| C59-C60-C61-C62     | 179.2(16)  |
| C57-C56-C61-C60     | 0.9(19)    |
| C55-C56-C61-C60     | 179.5(13)  |
| C57-C56-C61-C62     | -179.4(14) |
| C55-C56-C61-C62     | -1(2)      |
| C50-C49-C62-C61     | 4(3)       |
| C6-C49-C62-C61      | -176.2(15) |
| C60-C61-C62-C49     | -179.9(18) |
| C56-C61-C62-C49     | 0(3)       |
| C5-C6-C49'-C62'     | -62(3)     |
| C1-C6-C49'-C62'     | 111(2)     |
| C49-C6-C49'-C62'    | 102(18)    |
| C5-C6-C49'-C50'     | 124(2)     |
| C1-C6-C49'-C50'     | -63(3)     |
| C49-C6-C49'-C50'    | -71(16)    |
| C62'-C49'-C50'-C51' | 179(3)     |
| C6-C49'-C50'-C51'   | -8(4)      |
| C62'-C49'-C50'-C55' | 3(4)       |
| C6-C49'-C50'-C55'   | 176(2)     |
| C55'-C50'-C51'-C52' | -5(3)      |
| C49'-C50'-C51'-C52' | 179(2)     |
| C50'-C51'-C52'-C53' | 2(3)       |
| C51'-C52'-C53'-C54' | 2(2)       |
| C52'-C53'-C54'-C55' | -1.6(18)   |
| C53'-C54'-C55'-C50' | -2(2)      |
| C53'-C54'-C55'-C56' | 177.6(14)  |
| C51'-C50'-C55'-C54' | 6(3)       |
| C49'-C50'-C55'-C54' | -178(2)    |
| C51'-C50'-C55'-C56' | -174(2)    |
| C49'-C50'-C55'-C56' | 2(3)       |
| C54'-C55'-C56'-C57' | -5(2)      |
| C50'-C55'-C56'-C57' | 174.7(18)  |
| C54'-C55'-C56'-C61' | 179.4(18)  |
| C50'-C55'-C56'-C61' | -1(3)      |
| C61'-C56'-C57'-C58' | -1(2)      |
| C55'-C56'-C57'-C58' | -176.4(14) |

|                     |          |
|---------------------|----------|
| C56'-C57'-C58'-C59' | -1.3(19) |
| C57'-C58'-C59'-C60' | 1(2)     |
| C58'-C59'-C60'-C61' | 0(3)     |
| C59'-C60'-C61'-C56' | -3(3)    |
| C59'-C60'-C61'-C62' | -179(2)  |
| C57'-C56'-C61'-C60' | 3(3)     |
| C55'-C56'-C61'-C60' | 178(2)   |
| C57'-C56'-C61'-C62' | 180(2)   |
| C55'-C56'-C61'-C62' | -5(3)    |
| C50'-C49'-C62'-C61' | -9(4)    |
| C6-C49'-C62'-C61'   | 177(2)   |
| C60'-C61'-C62'-C49' | -173(3)  |
| C56'-C61'-C62'-C49' | 10(4)    |

-----

2.6. *10,19-Dihexyltetrabenzo[a,fg,ij,o]benzo[5,6]tetrapheno[8,9,10,11-rst]pentaphene (8)*

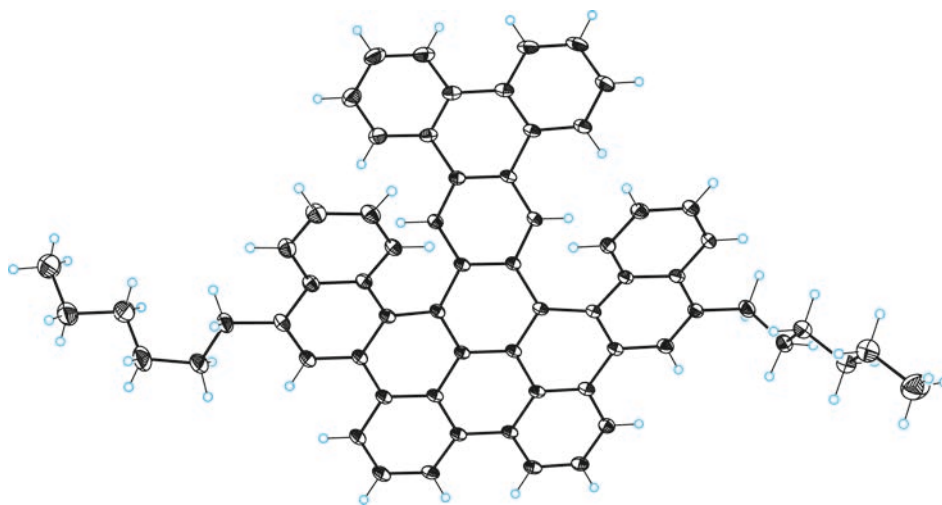

**Table 16.** Crystal data and structure refinement for **8**.

|                      |                                                 |          |
|----------------------|-------------------------------------------------|----------|
| Identification code  | mo_RD471_0m                                     |          |
| Empirical formula    | C <sub>68</sub> H <sub>54</sub> Cl <sub>4</sub> |          |
| Formula weight       | 1012.91                                         |          |
| Temperature          | 100(2) K                                        |          |
| Wavelength           | 0.71073 Å                                       |          |
| Crystal system       | Monoclinic                                      |          |
| Space group          | C2/c                                            |          |
| Unit cell dimensions | a = 47.051(2) Å                                 | a = 90°. |

|                                      |                                      |                 |
|--------------------------------------|--------------------------------------|-----------------|
|                                      | $b = 9.3095(5)\text{\AA}$            | $b =$           |
| 125.063(2)°.                         |                                      |                 |
|                                      | $c = 27.9099(13)\text{\AA}$          | $g = 90^\circ.$ |
| Volume                               | 10006.6(9) $\text{\AA}^3$            |                 |
| Z                                    | 8                                    |                 |
| Density (calculated)                 | 1.345 $\text{Mg/m}^3$                |                 |
| Absorption coefficient               | 0.282 $\text{mm}^{-1}$               |                 |
| F(000)                               | 4240                                 |                 |
| Crystal size                         | 0.03 x 0.005 x 0.002 $\text{mm}^3$   |                 |
| Theta range for data collection      | 1.783 to 29.461°.                    |                 |
| Index ranges                         | -64<=h<=64,-12<=k<=12,-34<=l<=38     |                 |
| Reflections collected                | 83017                                |                 |
| Independent reflections              | 13669[R(int) = 0.0394]               |                 |
| Completeness to theta =29.461°       | 98.4%                                |                 |
| Absorption correction                | Empirical                            |                 |
| Max. and min. transmission           | 0.999 and 0.914                      |                 |
| Refinement method                    | Full-matrix least-squares on $F^2$   |                 |
| Data / restraints / parameters       | 13669/ 197/ 727                      |                 |
| Goodness-of-fit on $F^2$             | 1.014                                |                 |
| Final R indices [ $I > 2\sigma(I)$ ] | $R1 = 0.0677, wR2 = 0.1859$          |                 |
| R indices (all data)                 | $R1 = 0.0915, wR2 = 0.2041$          |                 |
| Largest diff. peak and hole          | 0.978 and -0.862 $e.\text{\AA}^{-3}$ |                 |

**Table 17.** Bond lengths [ $\text{\AA}$ ] and angles [ $^\circ$ ] for **8**.

---

|                  |          |
|------------------|----------|
| Bond lengths---- |          |
| C1-C2            | 1.363(3) |
| C1-C10           | 1.424(3) |
| C2-C3            | 1.442(3) |
| C2-C55           | 1.501(3) |
| C3-C8            | 1.414(3) |
| C3-C4            | 1.417(3) |
| C4-C5            | 1.372(3) |
| C5-C6            | 1.398(3) |
| C6-C7            | 1.373(3) |
| C7-C8            | 1.421(3) |
| C8-C9            | 1.456(3) |
| C9-C10           | 1.402(3) |

|         |          |
|---------|----------|
| C9-C18  | 1.445(3) |
| C10-C11 | 1.450(3) |
| C11-C12 | 1.407(3) |
| C11-C16 | 1.422(3) |
| C12-C13 | 1.378(3) |
| C13-C14 | 1.383(3) |
| C14-C15 | 1.398(3) |
| C15-C16 | 1.420(3) |
| C15-C40 | 1.462(3) |
| C16-C17 | 1.438(2) |
| C17-C18 | 1.403(3) |
| C17-C38 | 1.438(3) |
| C18-C19 | 1.449(3) |
| C19-C20 | 1.407(3) |
| C19-C36 | 1.416(3) |
| C20-C21 | 1.389(3) |
| C21-C34 | 1.424(3) |
| C21-C22 | 1.471(3) |
| C22-C23 | 1.406(3) |
| C22-C27 | 1.413(3) |
| C23-C24 | 1.374(3) |
| C24-C25 | 1.393(4) |
| C25-C26 | 1.376(4) |
| C26-C27 | 1.406(3) |
| C27-C28 | 1.468(3) |
| C28-C33 | 1.408(3) |
| C28-C29 | 1.411(3) |
| C29-C30 | 1.372(4) |
| C30-C31 | 1.394(3) |
| C31-C32 | 1.380(3) |
| C32-C33 | 1.411(3) |
| C33-C34 | 1.468(3) |
| C34-C35 | 1.391(3) |
| C35-C36 | 1.412(3) |
| C36-C37 | 1.450(3) |
| C37-C38 | 1.406(2) |
| C37-C46 | 1.452(3) |
| C38-C39 | 1.437(3) |

|           |          |
|-----------|----------|
| C39-C44   | 1.417(3) |
| C39-C40   | 1.425(2) |
| C40-C41   | 1.399(3) |
| C41-C42   | 1.385(3) |
| C42-C43   | 1.380(3) |
| C43-C44   | 1.407(3) |
| C44-C45   | 1.455(3) |
| C45-C46   | 1.402(3) |
| C45-C54   | 1.421(3) |
| C46-C47   | 1.452(3) |
| C47-C48   | 1.422(3) |
| C47-C52   | 1.423(3) |
| C48-C49   | 1.375(3) |
| C49-C50   | 1.400(3) |
| C50-C51   | 1.371(3) |
| C51-C52   | 1.417(3) |
| C52-C53   | 1.440(3) |
| C53-C54   | 1.367(3) |
| C53-C61   | 1.517(3) |
| C55-C56   | 1.520(3) |
| C56-C57   | 1.515(4) |
| C57-C58   | 1.502(4) |
| C57-C58'  | 1.556(5) |
| C58-C59   | 1.526(4) |
| C59-C60   | 1.527(4) |
| C58'-C59' | 1.550(5) |
| C59'-C60' | 1.540(5) |
| C61-C62   | 1.532(3) |
| C62-C63   | 1.521(3) |
| C63-C64   | 1.526(3) |
| C64-C65   | 1.517(4) |
| C65-C66   | 1.531(4) |
| C1S-C2S   | 1.478(6) |
| C1S-C11S  | 1.718(5) |
| C1S-C12S  | 1.762(4) |
| C2S-C13S  | 1.780(4) |
| C2S-C14S  | 1.825(5) |
| C1S'-C2S' | 1.470(7) |



|           |          |
|-----------|----------|
| C1S'-C11' | 1.704(6) |
| C1S'-C12' | 1.758(6) |
| C2S'-C13' | 1.771(6) |
| C2S'-C14' | 1.829(6) |

Angles-----

|             |            |
|-------------|------------|
| C2-C1-C10   | 123.36(18) |
| C1-C2-C3    | 117.86(19) |
| C1-C2-C55   | 122.29(18) |
| C3-C2-C55   | 119.79(19) |
| C8-C3-C4    | 119.03(18) |
| C8-C3-C2    | 119.98(18) |
| C4-C3-C2    | 120.81(19) |
| C5-C4-C3    | 121.1(2)   |
| C4-C5-C6    | 120.0(2)   |
| C7-C6-C5    | 120.11(19) |
| C6-C7-C8    | 121.4(2)   |
| C3-C8-C7    | 118.05(18) |
| C3-C8-C9    | 119.94(17) |
| C7-C8-C9    | 121.70(18) |
| C10-C9-C18  | 119.02(18) |
| C10-C9-C8   | 117.45(18) |
| C18-C9-C8   | 123.39(17) |
| C9-C10-C1   | 119.37(18) |
| C9-C10-C11  | 119.93(18) |
| C1-C10-C11  | 120.71(17) |
| C12-C11-C16 | 118.81(18) |
| C12-C11-C10 | 121.77(19) |
| C16-C11-C10 | 119.36(17) |
| C13-C12-C11 | 120.5(2)   |
| C12-C13-C14 | 120.74(19) |
| C13-C14-C15 | 121.30(19) |
| C14-C15-C16 | 118.40(19) |
| C14-C15-C40 | 121.72(18) |
| C16-C15-C40 | 119.85(17) |
| C15-C16-C11 | 120.19(17) |
| C15-C16-C17 | 120.05(18) |
| C11-C16-C17 | 119.53(17) |

|             |            |
|-------------|------------|
| C18-C17-C16 | 119.76(18) |
| C18-C17-C38 | 120.19(16) |
| C16-C17-C38 | 120.03(17) |
| C17-C18-C9  | 119.46(17) |
| C17-C18-C19 | 116.34(18) |
| C9-C18-C19  | 123.77(17) |
| C20-C19-C36 | 118.38(17) |
| C20-C19-C18 | 121.33(18) |
| C36-C19-C18 | 119.69(17) |
| C21-C20-C19 | 123.16(19) |
| C20-C21-C34 | 118.41(18) |
| C20-C21-C22 | 121.94(19) |
| C34-C21-C22 | 119.59(17) |
| C23-C22-C27 | 118.48(19) |
| C23-C22-C21 | 121.55(19) |
| C27-C22-C21 | 119.96(19) |
| C24-C23-C22 | 121.6(2)   |
| C23-C24-C25 | 120.1(2)   |
| C26-C25-C24 | 119.3(2)   |
| C25-C26-C27 | 121.9(2)   |
| C26-C27-C22 | 118.6(2)   |
| C26-C27-C28 | 121.4(2)   |
| C22-C27-C28 | 120.05(19) |
| C33-C28-C29 | 118.4(2)   |
| C33-C28-C27 | 120.05(18) |
| C29-C28-C27 | 121.5(2)   |
| C30-C29-C28 | 121.6(2)   |
| C29-C30-C31 | 120.2(2)   |
| C32-C31-C30 | 119.4(2)   |
| C31-C32-C33 | 121.4(2)   |
| C28-C33-C32 | 118.97(18) |
| C28-C33-C34 | 120.13(19) |
| C32-C33-C34 | 120.84(18) |
| C35-C34-C21 | 118.70(17) |
| C35-C34-C33 | 121.58(18) |
| C21-C34-C33 | 119.71(18) |
| C34-C35-C36 | 122.75(19) |
| C35-C36-C19 | 118.34(18) |

|             |            |
|-------------|------------|
| C35-C36-C37 | 121.46(18) |
| C19-C36-C37 | 119.67(17) |
| C38-C37-C36 | 116.32(18) |
| C38-C37-C46 | 119.08(17) |
| C36-C37-C46 | 124.01(16) |
| C37-C38-C39 | 119.74(18) |
| C37-C38-C17 | 120.23(17) |
| C39-C38-C17 | 120.01(16) |
| C44-C39-C40 | 120.15(17) |
| C44-C39-C38 | 119.66(17) |
| C40-C39-C38 | 119.98(18) |
| C41-C40-C39 | 118.25(19) |
| C41-C40-C15 | 121.92(17) |
| C39-C40-C15 | 119.80(17) |
| C42-C41-C40 | 121.40(18) |
| C43-C42-C41 | 120.67(19) |
| C42-C43-C44 | 120.4(2)   |
| C43-C44-C39 | 119.11(17) |
| C43-C44-C45 | 121.42(19) |
| C39-C44-C45 | 119.37(17) |
| C46-C45-C54 | 118.90(17) |
| C46-C45-C44 | 119.71(18) |
| C54-C45-C44 | 121.39(18) |
| C45-C46-C47 | 117.72(18) |
| C45-C46-C37 | 118.76(17) |
| C47-C46-C37 | 123.49(17) |
| C48-C47-C52 | 117.95(17) |
| C48-C47-C46 | 121.66(18) |
| C52-C47-C46 | 120.24(17) |
| C49-C48-C47 | 121.38(19) |
| C48-C49-C50 | 120.0(2)   |
| C51-C50-C49 | 120.35(18) |
| C50-C51-C52 | 121.0(2)   |
| C51-C52-C47 | 119.07(18) |
| C51-C52-C53 | 121.52(19) |
| C47-C52-C53 | 119.39(17) |
| C54-C53-C52 | 117.95(19) |
| C54-C53-C61 | 119.02(19) |

|                |            |
|----------------|------------|
| C52-C53-C61    | 123.02(18) |
| C53-C54-C45    | 123.76(19) |
| C2-C55-C56     | 116.15(19) |
| C57-C56-C55    | 113.4(2)   |
| C58-C57-C56    | 115.0(3)   |
| C56-C57-C58'   | 109.3(6)   |
| C57-C58-C59    | 110.7(3)   |
| C58-C59-C60    | 111.3(3)   |
| C59'-C58'-C57  | 136.4(13)  |
| C60'-C59'-C58' | 112.2(12)  |
| C53-C61-C62    | 114.87(19) |
| C63-C62-C61    | 115.73(19) |
| C62-C63-C64    | 112.6(2)   |
| C65-C64-C63    | 113.7(2)   |
| C64-C65-C66    | 112.3(2)   |
| C2S-C1S-C11S   | 109.8(4)   |
| C2S-C1S-C12S   | 112.5(3)   |
| C11S-C1S-C12S  | 110.9(3)   |
| C1S-C2S-C13S   | 113.9(3)   |
| C1S-C2S-C14S   | 108.2(3)   |
| C13S-C2S-C14S  | 110.1(2)   |
| C2S'-C1S'-C11' | 113.7(5)   |
| C2S'-C1S'-C12' | 114.6(5)   |
| C11'-C1S'-C12' | 110.9(5)   |
| C1S'-C2S'-C13' | 115.3(5)   |
| C1S'-C2S'-C14' | 109.4(5)   |
| C13'-C2S'-C14' | 107.7(4)   |

-----  
**Table 18.** Torsion angles [°] for **8**.

---

|               |           |
|---------------|-----------|
| C10-C1-C2-C3  | -7.9(3)   |
| C10-C1-C2-C55 | 174.7(2)  |
| C1-C2-C3-C8   | 6.6(3)    |
| C55-C2-C3-C8  | -176.0(2) |
| C1-C2-C3-C4   | -168.4(2) |
| C55-C2-C3-C4  | 9.0(3)    |
| C8-C3-C4-C5   | -4.2(3)   |
| C2-C3-C4-C5   | 170.9(2)  |

|                 |             |
|-----------------|-------------|
| C3-C4-C5-C6     | -0.8(4)     |
| C4-C5-C6-C7     | 3.9(4)      |
| C5-C6-C7-C8     | -1.9(3)     |
| C4-C3-C8-C7     | 6.0(3)      |
| C2-C3-C8-C7     | -169.10(19) |
| C4-C3-C8-C9     | 179.86(19)  |
| C2-C3-C8-C9     | 4.7(3)      |
| C6-C7-C8-C3     | -3.1(3)     |
| C6-C7-C8-C9     | -176.8(2)   |
| C3-C8-C9-C10    | -14.9(3)    |
| C7-C8-C9-C10    | 158.66(19)  |
| C3-C8-C9-C18    | 169.31(19)  |
| C7-C8-C9-C18    | -17.1(3)    |
| C18-C9-C10-C1   | -170.20(18) |
| C8-C9-C10-C1    | 13.8(3)     |
| C18-C9-C10-C11  | 10.2(3)     |
| C8-C9-C10-C11   | -165.71(18) |
| C2-C1-C10-C9    | -2.6(3)     |
| C2-C1-C10-C11   | 177.0(2)    |
| C9-C10-C11-C12  | -178.9(2)   |
| C1-C10-C11-C12  | 1.6(3)      |
| C9-C10-C11-C16  | 4.0(3)      |
| C1-C10-C11-C16  | -175.58(19) |
| C16-C11-C12-C13 | 0.1(3)      |
| C10-C11-C12-C13 | -177.1(2)   |
| C11-C12-C13-C14 | 0.3(4)      |
| C12-C13-C14-C15 | -0.4(4)     |
| C13-C14-C15-C16 | 0.1(3)      |
| C13-C14-C15-C40 | -178.0(2)   |
| C14-C15-C16-C11 | 0.3(3)      |
| C40-C15-C16-C11 | 178.40(18)  |
| C14-C15-C16-C17 | -174.11(19) |
| C40-C15-C16-C17 | 4.0(3)      |
| C12-C11-C16-C15 | -0.4(3)     |
| C10-C11-C16-C15 | 176.84(18)  |
| C12-C11-C16-C17 | 174.05(19)  |
| C10-C11-C16-C17 | -8.7(3)     |
| C15-C16-C17-C18 | 173.44(18)  |

|                 |             |
|-----------------|-------------|
| C11-C16-C17-C18 | -1.0(3)     |
| C15-C16-C17-C38 | -5.2(3)     |
| C11-C16-C17-C38 | -179.65(18) |
| C16-C17-C18-C9  | 15.4(3)     |
| C38-C17-C18-C9  | -165.99(18) |
| C16-C17-C18-C19 | -157.36(18) |
| C38-C17-C18-C19 | 21.3(3)     |
| C10-C9-C18-C17  | -20.1(3)    |
| C8-C9-C18-C17   | 155.62(19)  |
| C10-C9-C18-C19  | 152.09(19)  |
| C8-C9-C18-C19   | -32.2(3)    |
| C17-C18-C19-C20 | 147.98(19)  |
| C9-C18-C19-C20  | -24.4(3)    |
| C17-C18-C19-C36 | -23.0(3)    |
| C9-C18-C19-C36  | 164.60(18)  |
| C36-C19-C20-C21 | -3.1(3)     |
| C18-C19-C20-C21 | -174.18(18) |
| C19-C20-C21-C34 | -0.8(3)     |
| C19-C20-C21-C22 | 176.21(19)  |
| C20-C21-C22-C23 | -0.6(3)     |
| C34-C21-C22-C23 | 176.4(2)    |
| C20-C21-C22-C27 | -178.99(19) |
| C34-C21-C22-C27 | -2.0(3)     |
| C27-C22-C23-C24 | 1.3(3)      |
| C21-C22-C23-C24 | -177.1(2)   |
| C22-C23-C24-C25 | -0.2(4)     |
| C23-C24-C25-C26 | -0.4(4)     |
| C24-C25-C26-C27 | -0.2(4)     |
| C25-C26-C27-C22 | 1.3(4)      |
| C25-C26-C27-C28 | -177.9(2)   |
| C23-C22-C27-C26 | -1.8(3)     |
| C21-C22-C27-C26 | 176.6(2)    |
| C23-C22-C27-C28 | 177.5(2)    |
| C21-C22-C27-C28 | -4.1(3)     |
| C26-C27-C28-C33 | -175.6(2)   |
| C22-C27-C28-C33 | 5.1(3)      |
| C26-C27-C28-C29 | 5.6(3)      |
| C22-C27-C28-C29 | -173.7(2)   |

|                 |             |
|-----------------|-------------|
| C33-C28-C29-C30 | -0.1(3)     |
| C27-C28-C29-C30 | 178.7(2)    |
| C28-C29-C30-C31 | -0.7(4)     |
| C29-C30-C31-C32 | 0.1(4)      |
| C30-C31-C32-C33 | 1.3(3)      |
| C29-C28-C33-C32 | 1.5(3)      |
| C27-C28-C33-C32 | -177.37(19) |
| C29-C28-C33-C34 | 178.8(2)    |
| C27-C28-C33-C34 | 0.0(3)      |
| C31-C32-C33-C28 | -2.1(3)     |
| C31-C32-C33-C34 | -179.4(2)   |
| C20-C21-C34-C35 | 5.0(3)      |
| C22-C21-C34-C35 | -172.09(18) |
| C20-C21-C34-C33 | -175.84(18) |
| C22-C21-C34-C33 | 7.1(3)      |
| C28-C33-C34-C35 | 173.07(19)  |
| C32-C33-C34-C35 | -9.6(3)     |
| C28-C33-C34-C21 | -6.1(3)     |
| C32-C33-C34-C21 | 171.19(19)  |
| C21-C34-C35-C36 | -5.5(3)     |
| C33-C34-C35-C36 | 175.35(18)  |
| C34-C35-C36-C19 | 1.6(3)      |
| C34-C35-C36-C37 | 173.24(18)  |
| C20-C19-C36-C35 | 2.7(3)      |
| C18-C19-C36-C35 | 173.92(17)  |
| C20-C19-C36-C37 | -169.13(18) |
| C18-C19-C36-C37 | 2.1(3)      |
| C35-C36-C37-C38 | -150.97(19) |
| C19-C36-C37-C38 | 20.6(3)     |
| C35-C36-C37-C46 | 20.1(3)     |
| C19-C36-C37-C46 | -168.41(18) |
| C36-C37-C38-C39 | 155.93(18)  |
| C46-C37-C38-C39 | -15.6(3)    |
| C36-C37-C38-C17 | -22.5(3)    |
| C46-C37-C38-C17 | 165.96(18)  |
| C18-C17-C38-C37 | 1.6(3)      |
| C16-C17-C38-C37 | -179.82(18) |
| C18-C17-C38-C39 | -176.91(18) |

|                 |             |
|-----------------|-------------|
| C16-C17-C38-C39 | 1.7(3)      |
| C37-C38-C39-C44 | -0.8(3)     |
| C17-C38-C39-C44 | 177.68(18)  |
| C37-C38-C39-C40 | -175.51(18) |
| C17-C38-C39-C40 | 3.0(3)      |
| C44-C39-C40-C41 | -0.8(3)     |
| C38-C39-C40-C41 | 173.92(18)  |
| C44-C39-C40-C15 | -178.85(18) |
| C38-C39-C40-C15 | -4.2(3)     |
| C14-C15-C40-C41 | 0.7(3)      |
| C16-C15-C40-C41 | -177.31(19) |
| C14-C15-C40-C39 | 178.7(2)    |
| C16-C15-C40-C39 | 0.7(3)      |
| C39-C40-C41-C42 | 0.0(3)      |
| C15-C40-C41-C42 | 178.00(19)  |
| C40-C41-C42-C43 | 0.3(3)      |
| C41-C42-C43-C44 | 0.3(3)      |
| C42-C43-C44-C39 | -1.1(3)     |
| C42-C43-C44-C45 | 175.14(19)  |
| C40-C39-C44-C43 | 1.3(3)      |
| C38-C39-C44-C43 | -173.38(18) |
| C40-C39-C44-C45 | -174.98(18) |
| C38-C39-C44-C45 | 10.3(3)     |
| C43-C44-C45-C46 | -179.47(19) |
| C39-C44-C45-C46 | -3.2(3)     |
| C43-C44-C45-C54 | 0.7(3)      |
| C39-C44-C45-C54 | 176.93(19)  |
| C54-C45-C46-C47 | -15.0(3)    |
| C44-C45-C46-C47 | 165.21(18)  |
| C54-C45-C46-C37 | 166.85(18)  |
| C44-C45-C46-C37 | -13.0(3)    |
| C38-C37-C46-C45 | 22.5(3)     |
| C36-C37-C46-C45 | -148.26(19) |
| C38-C37-C46-C47 | -155.53(19) |
| C36-C37-C46-C47 | 33.7(3)     |
| C45-C46-C47-C48 | -161.25(19) |
| C37-C46-C47-C48 | 16.8(3)     |
| C45-C46-C47-C52 | 14.2(3)     |



|                    |             |
|--------------------|-------------|
| C37-C46-C47-C52    | -167.66(18) |
| C52-C47-C48-C49    | 4.9(3)      |
| C46-C47-C48-C49    | -179.5(2)   |
| C47-C48-C49-C50    | -0.7(3)     |
| C48-C49-C50-C51    | -2.5(3)     |
| C49-C50-C51-C52    | 1.4(3)      |
| C50-C51-C52-C47    | 2.9(3)      |
| C50-C51-C52-C53    | -175.5(2)   |
| C48-C47-C52-C51    | -5.9(3)     |
| C46-C47-C52-C51    | 178.47(19)  |
| C48-C47-C52-C53    | 172.52(19)  |
| C46-C47-C52-C53    | -3.1(3)     |
| C51-C52-C53-C54    | 171.2(2)    |
| C47-C52-C53-C54    | -7.1(3)     |
| C51-C52-C53-C61    | -7.9(3)     |
| C47-C52-C53-C61    | 173.71(19)  |
| C52-C53-C54-C45    | 6.5(3)      |
| C61-C53-C54-C45    | -174.3(2)   |
| C46-C45-C54-C53    | 4.8(3)      |
| C44-C45-C54-C53    | -175.3(2)   |
| C1-C2-C55-C56      | -5.3(3)     |
| C3-C2-C55-C56      | 177.4(2)    |
| C2-C55-C56-C57     | -174.2(2)   |
| C55-C56-C57-C58    | 61.9(4)     |
| C55-C56-C57-C58'   | 80.7(7)     |
| C56-C57-C58-C59    | 171.2(3)    |
| C58'-C57-C58-C59   | 96(2)       |
| C57-C58-C59-C60    | 177.3(4)    |
| C58-C57-C58'-C59'  | -62.4(19)   |
| C56-C57-C58'-C59'  | -174.2(15)  |
| C57-C58'-C59'-C60' | 63(2)       |
| C54-C53-C61-C62    | -82.0(3)    |
| C52-C53-C61-C62    | 97.2(2)     |
| C53-C61-C62-C63    | -72.4(2)    |
| C61-C62-C63-C64    | -173.42(19) |
| C62-C63-C64-C65    | 179.8(2)    |
| C63-C64-C65-C66    | -178.6(2)   |
| C11S-C1S-C2S-C13S  | -65.3(4)    |

|                     |           |
|---------------------|-----------|
| CI2S-C1S-C2S-CI3S   | 58.7(4)   |
| CI1S-C1S-C2S-CI4S   | 171.9(3)  |
| CI2S-C1S-C2S-CI4S   | -64.1(4)  |
| CI1'-C1S'-C2S'-CI3' | 65.9(8)   |
| CI2'-C1S'-C2S'-CI3' | -165.1(5) |
| CI1'-C1S'-C2S'-CI4' | -55.6(7)  |
| CI2'-C1S'-C2S'-CI4' | 73.4(6)   |

-----

### 3. $^1\text{H}$ -NMR and $^{13}\text{C}$ -NMR Spectra

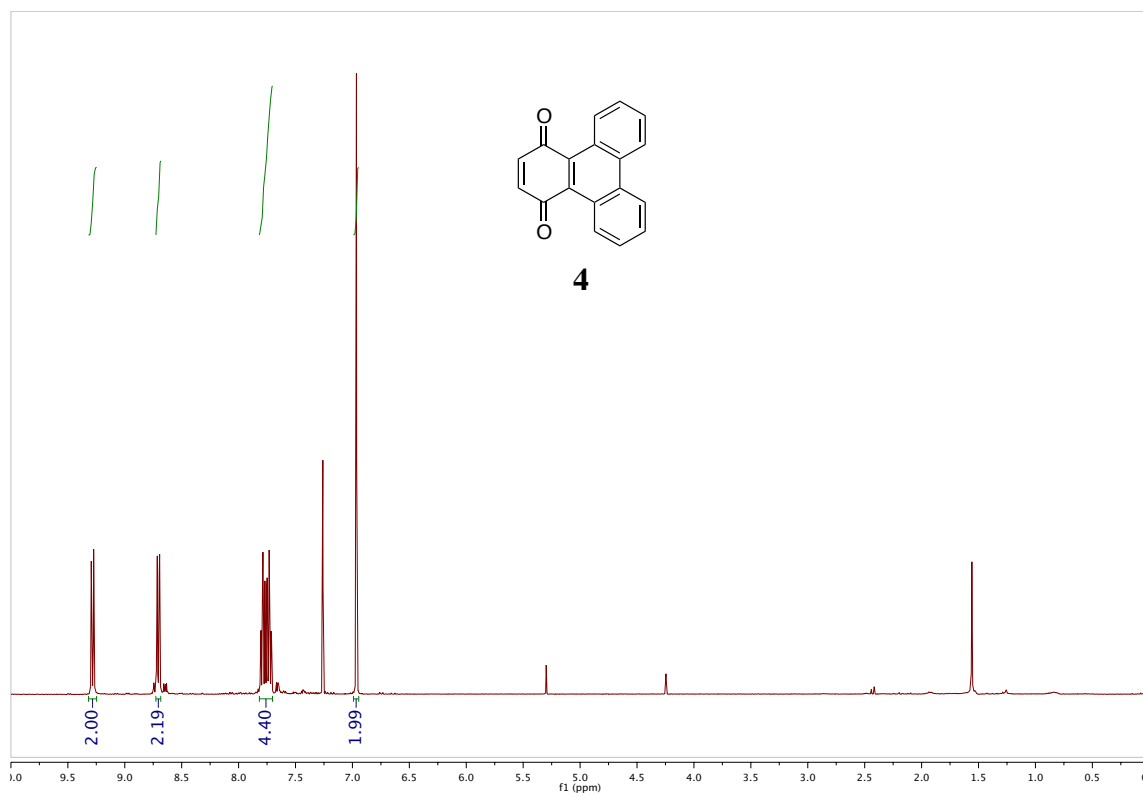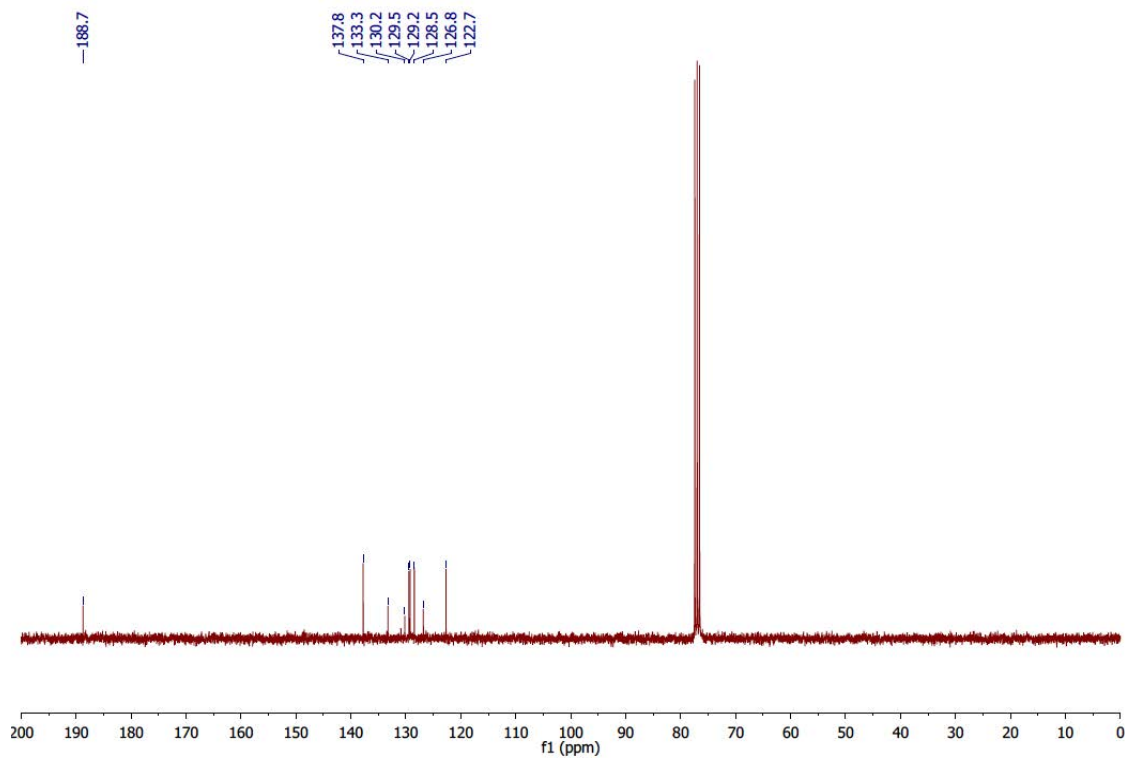

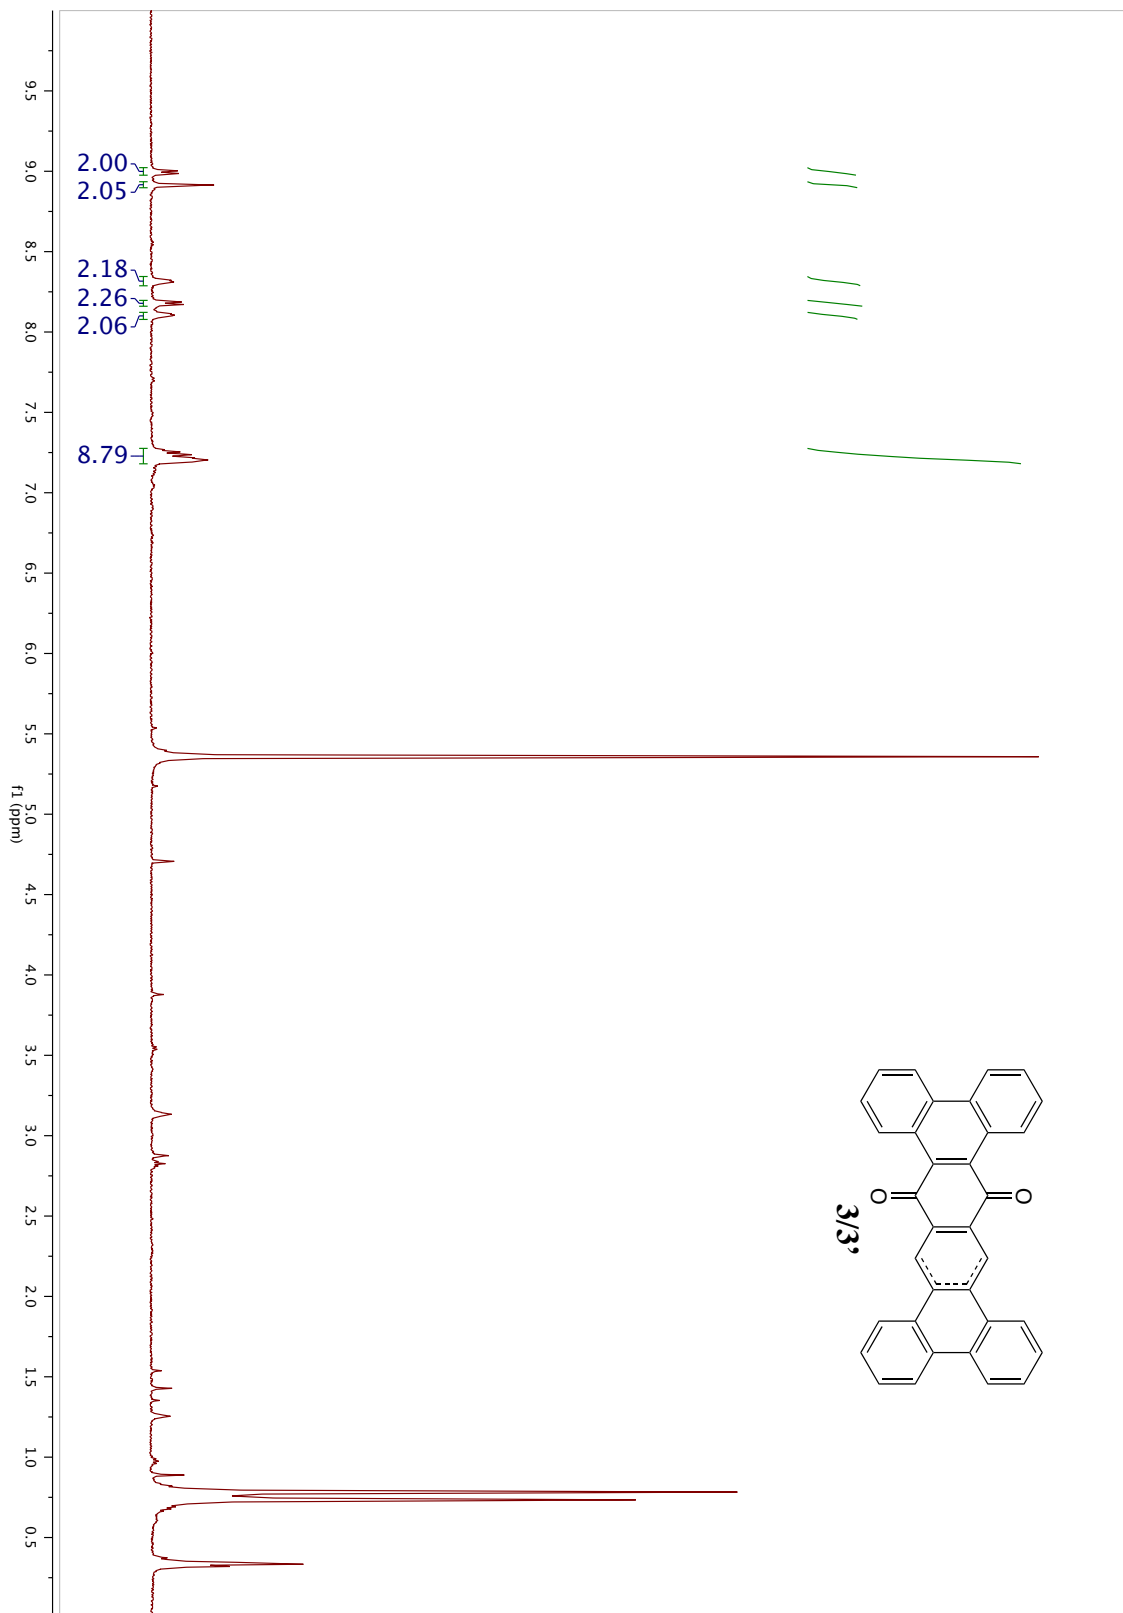

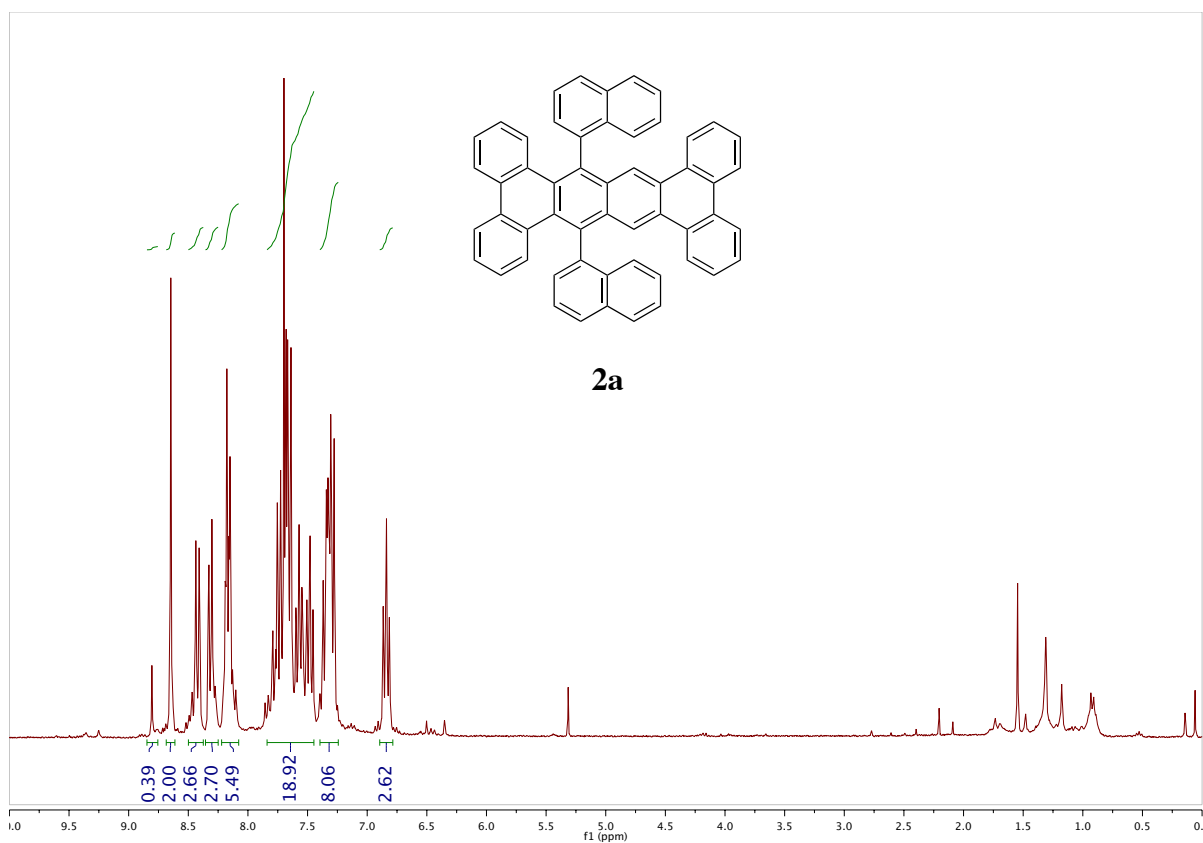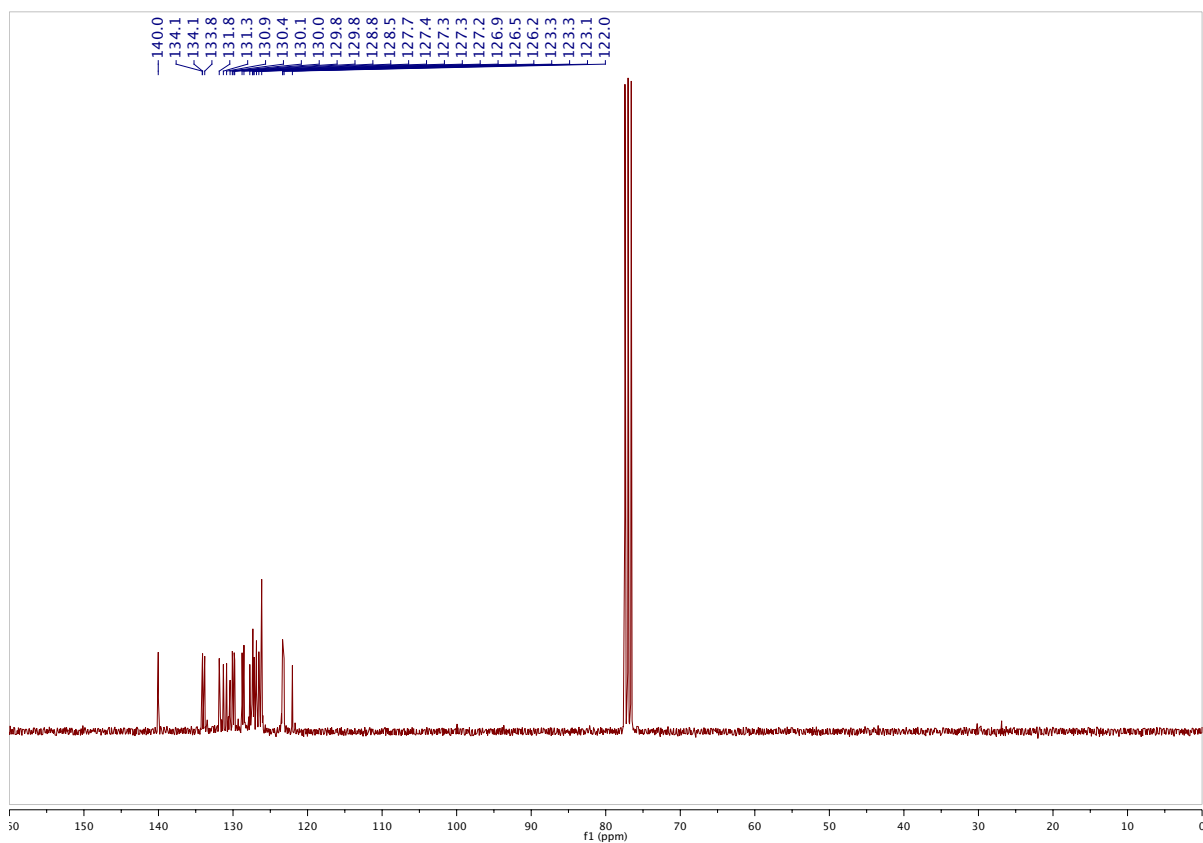

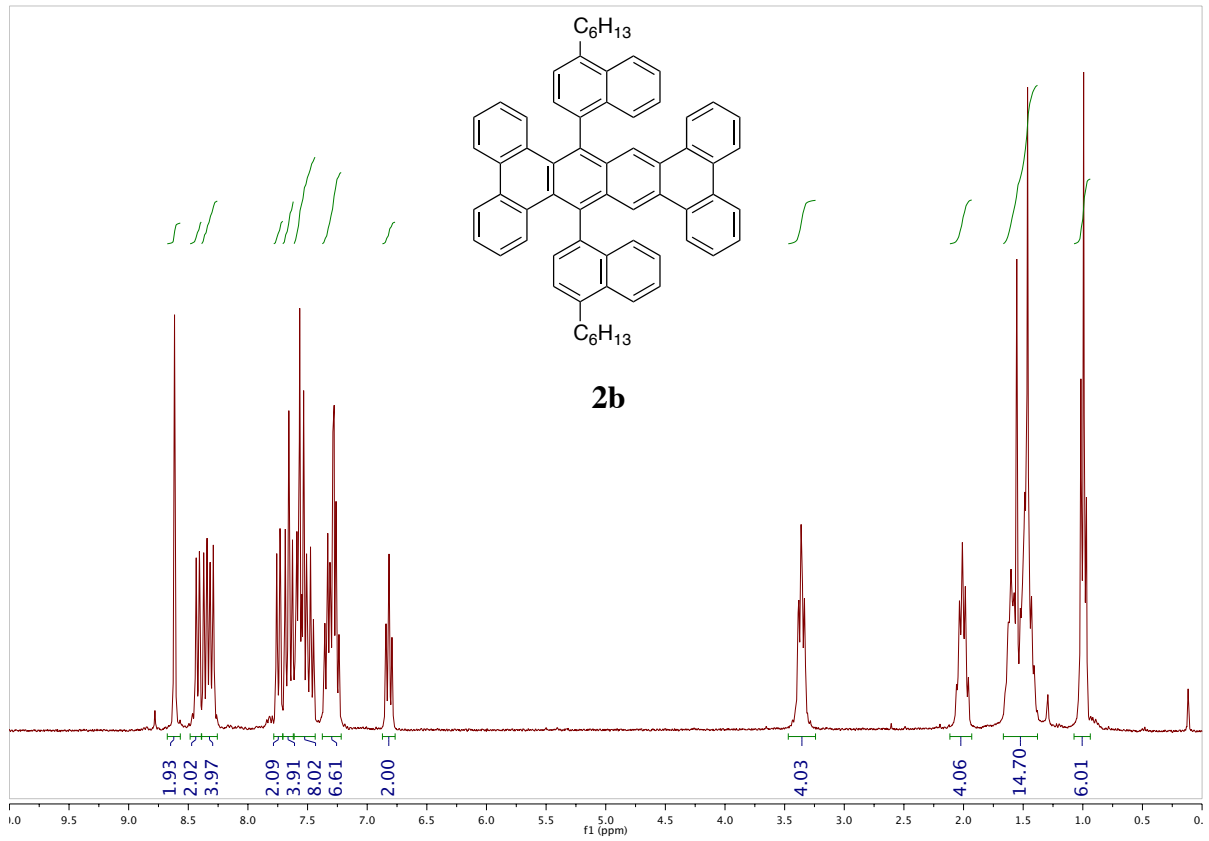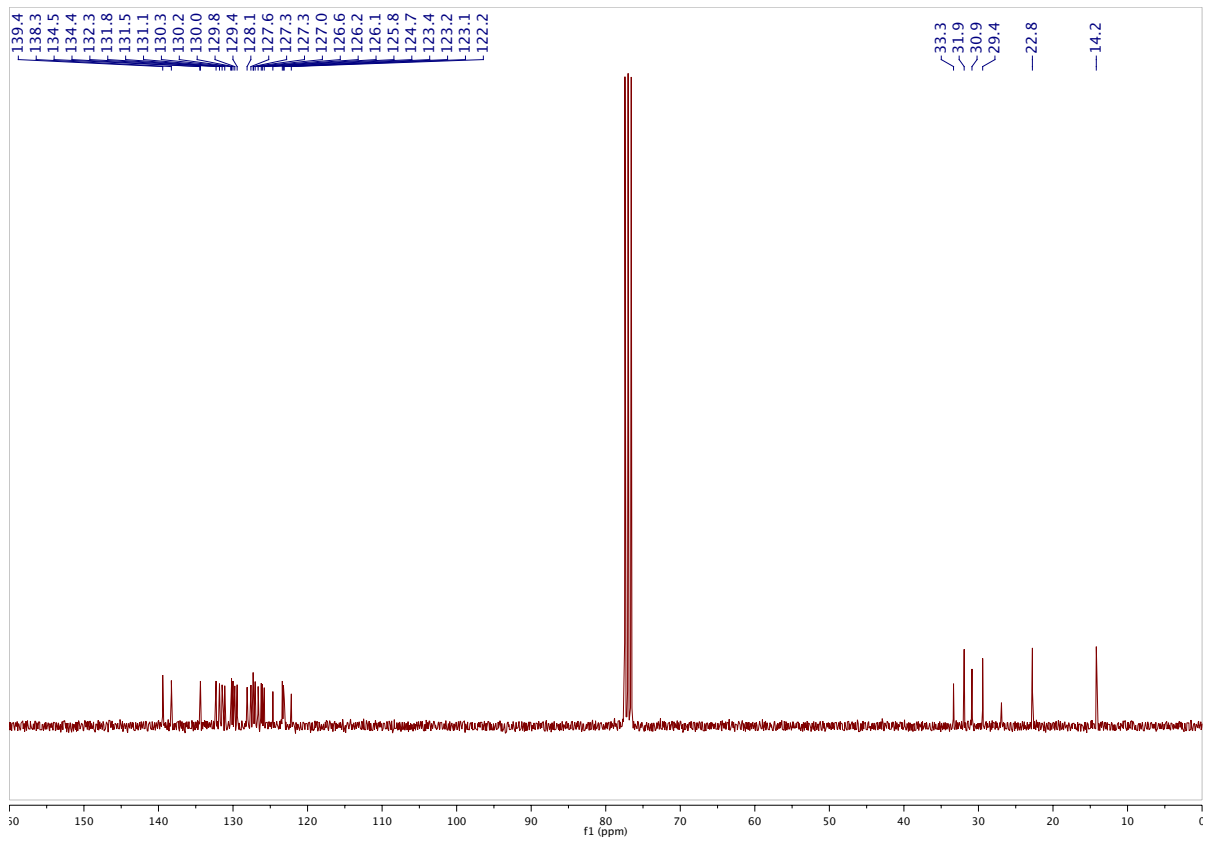

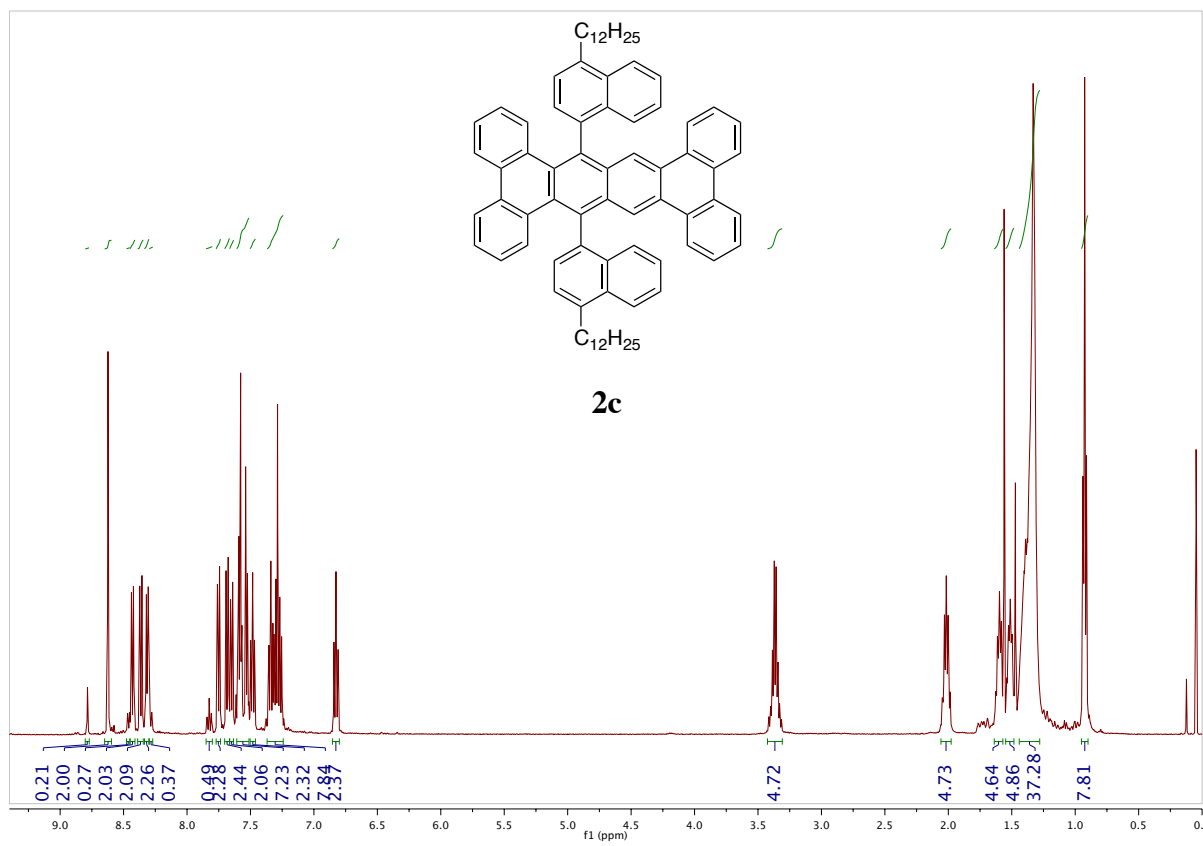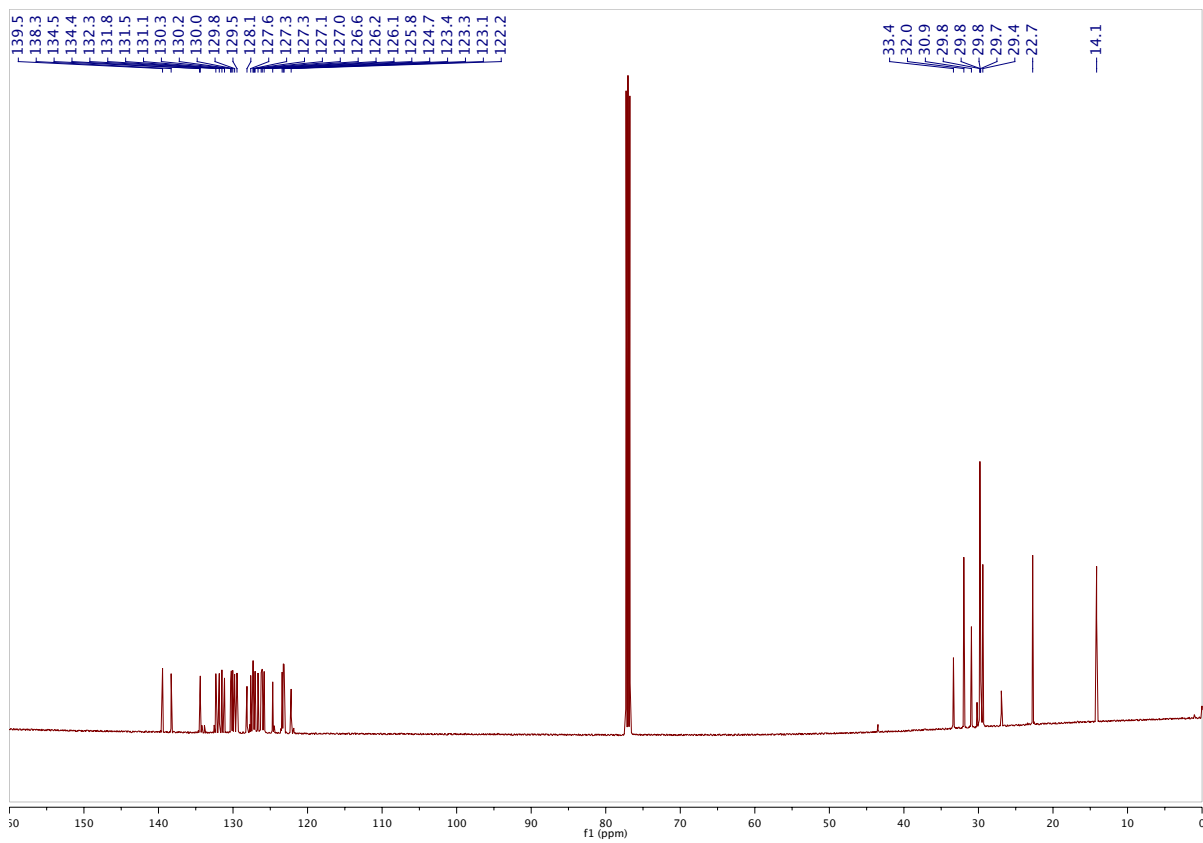

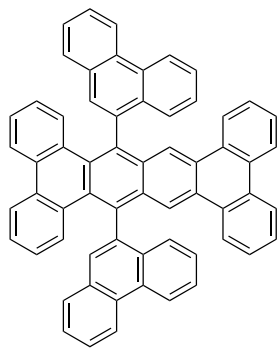

2d

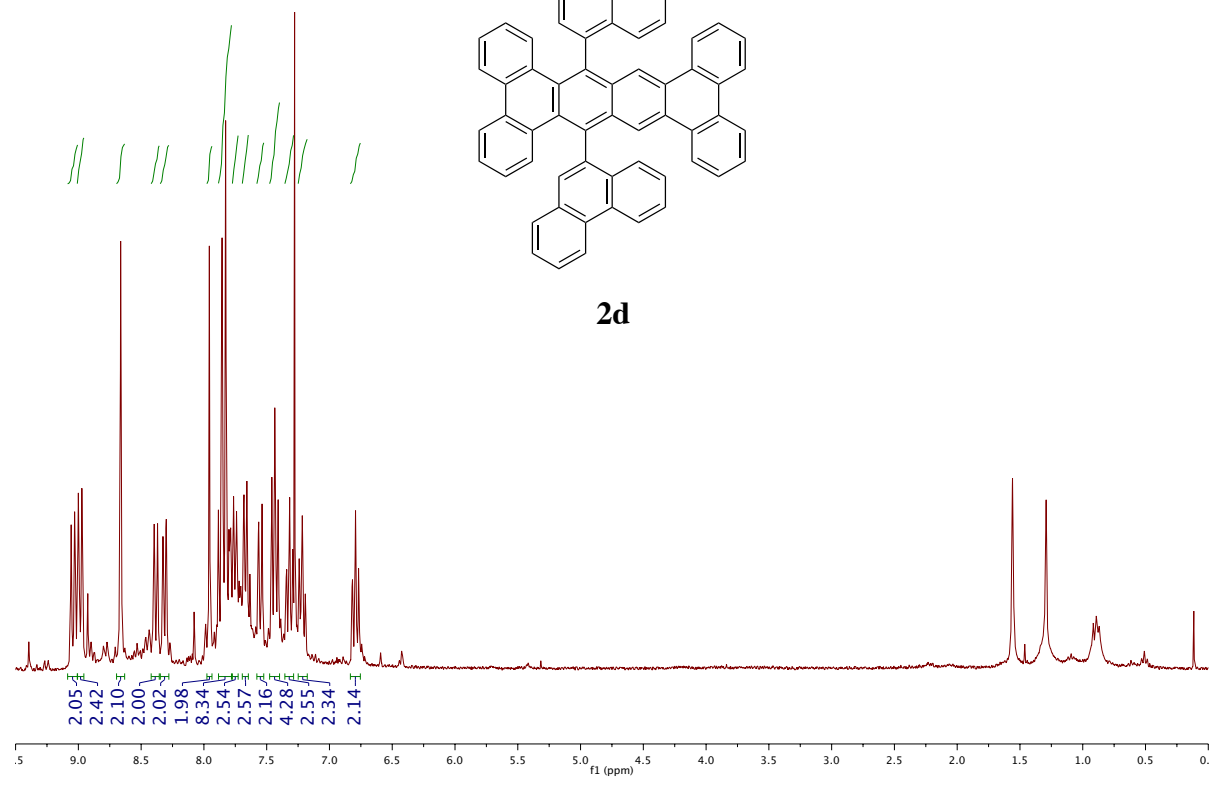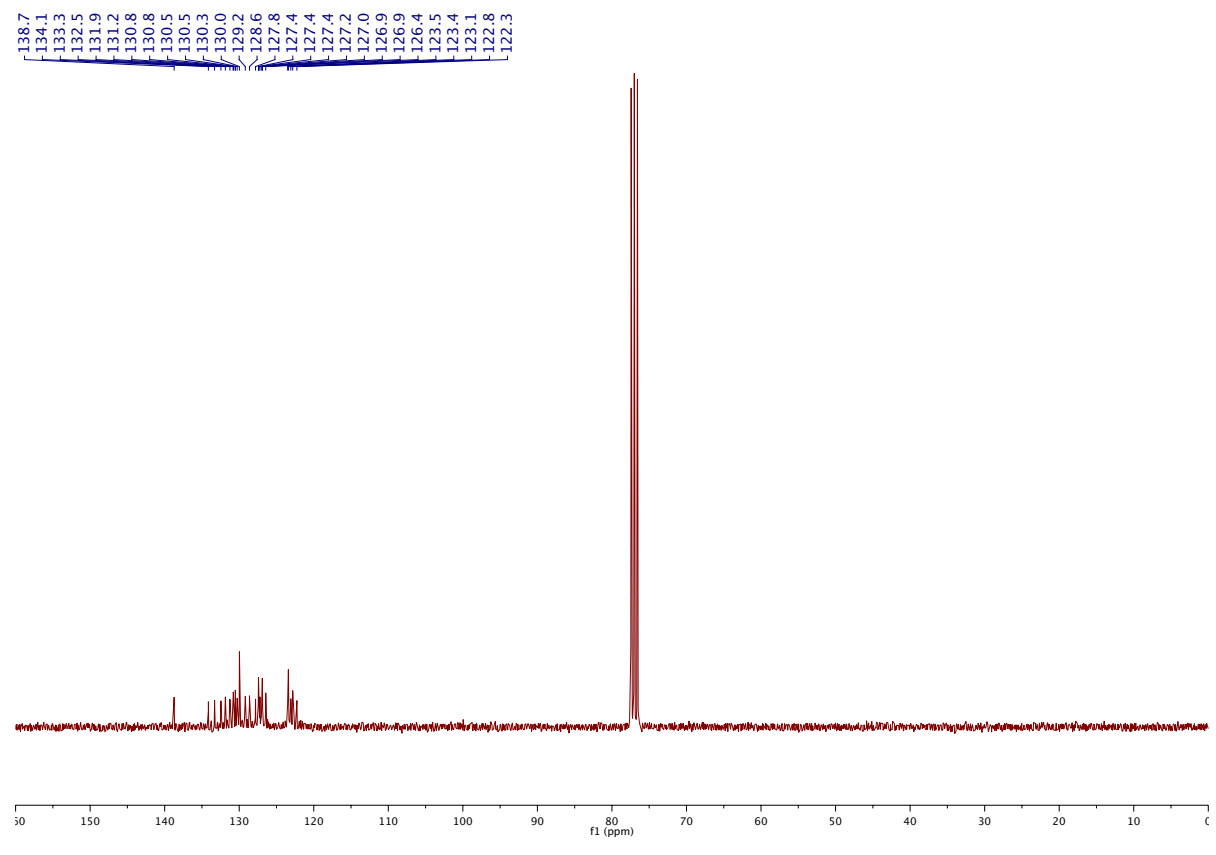



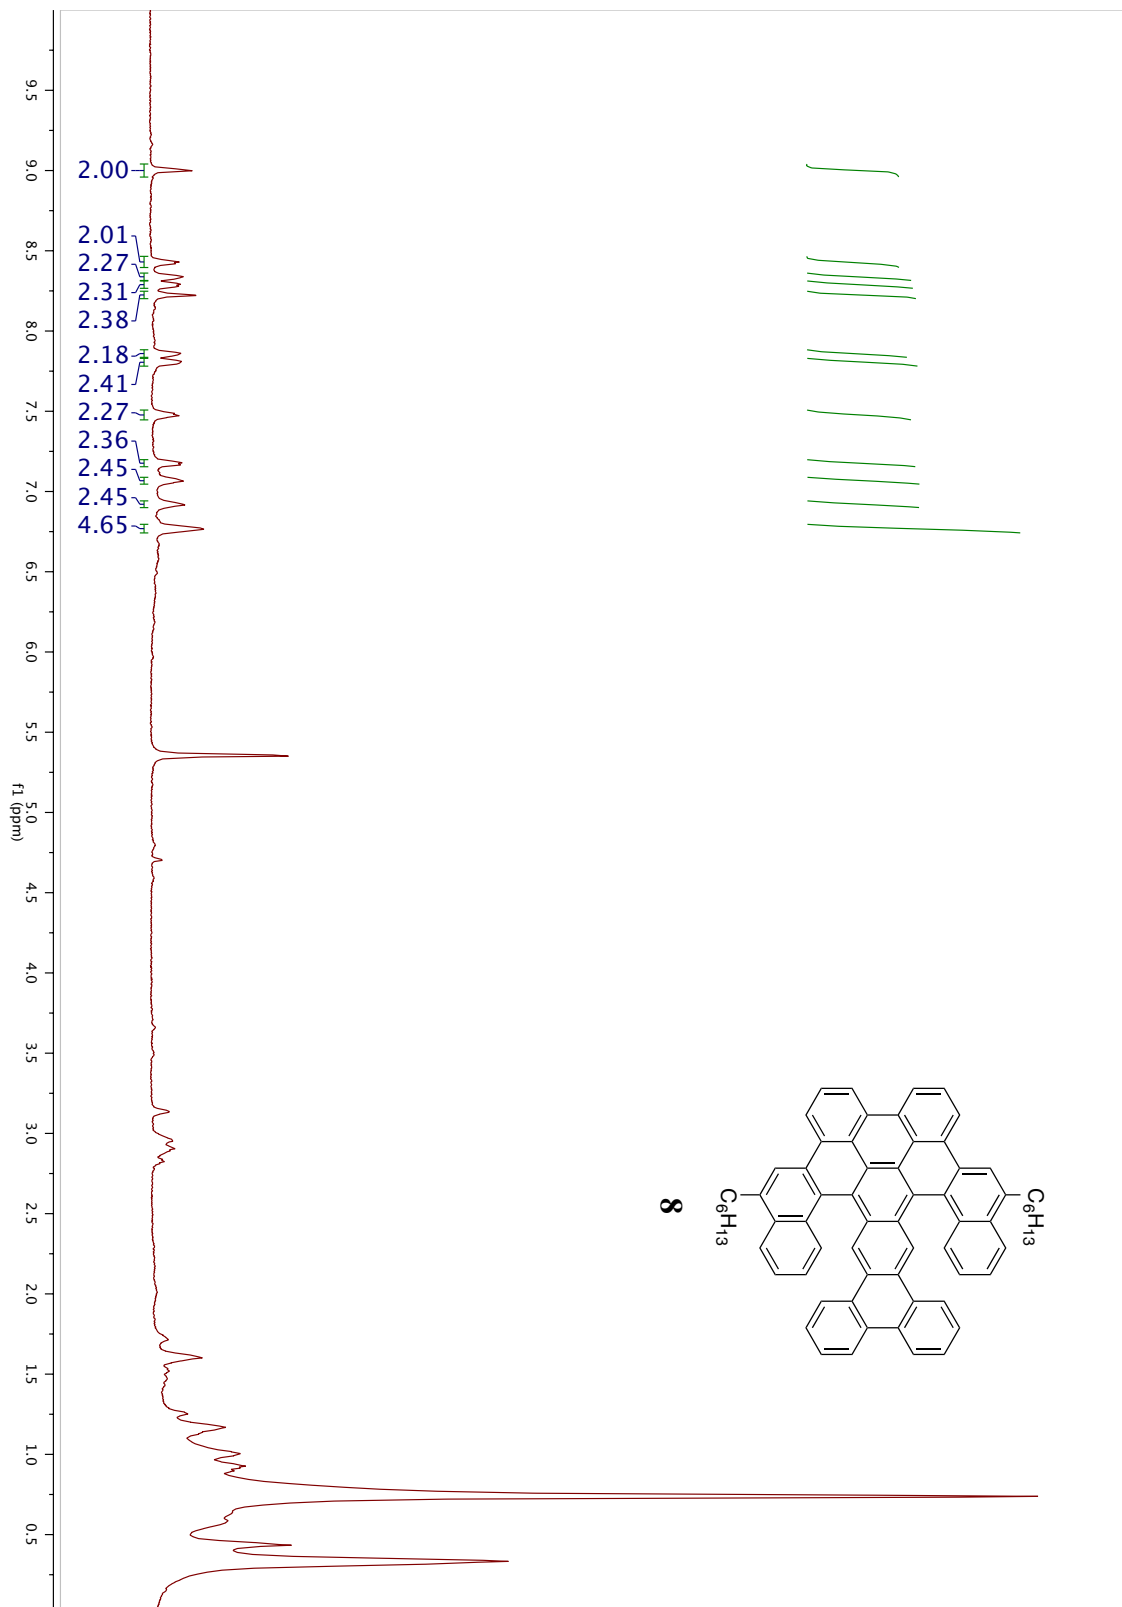

# SS-NMR

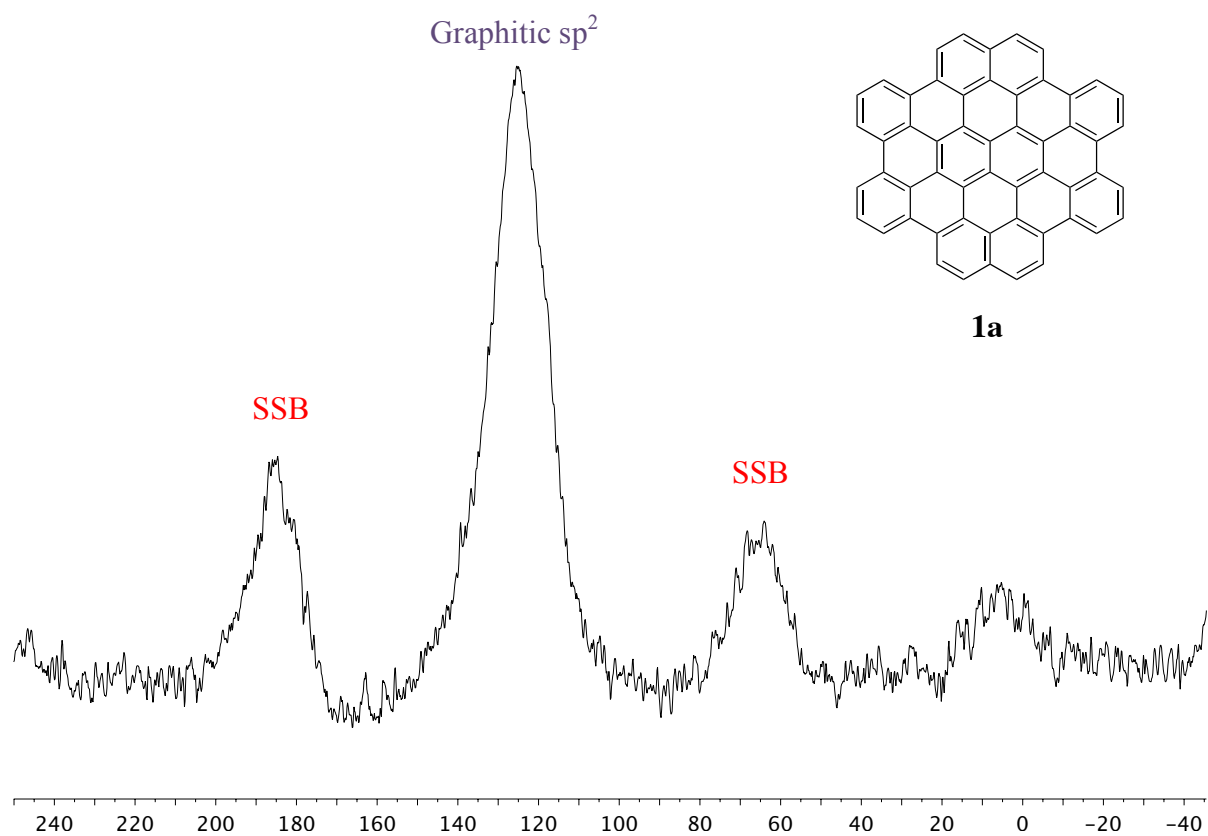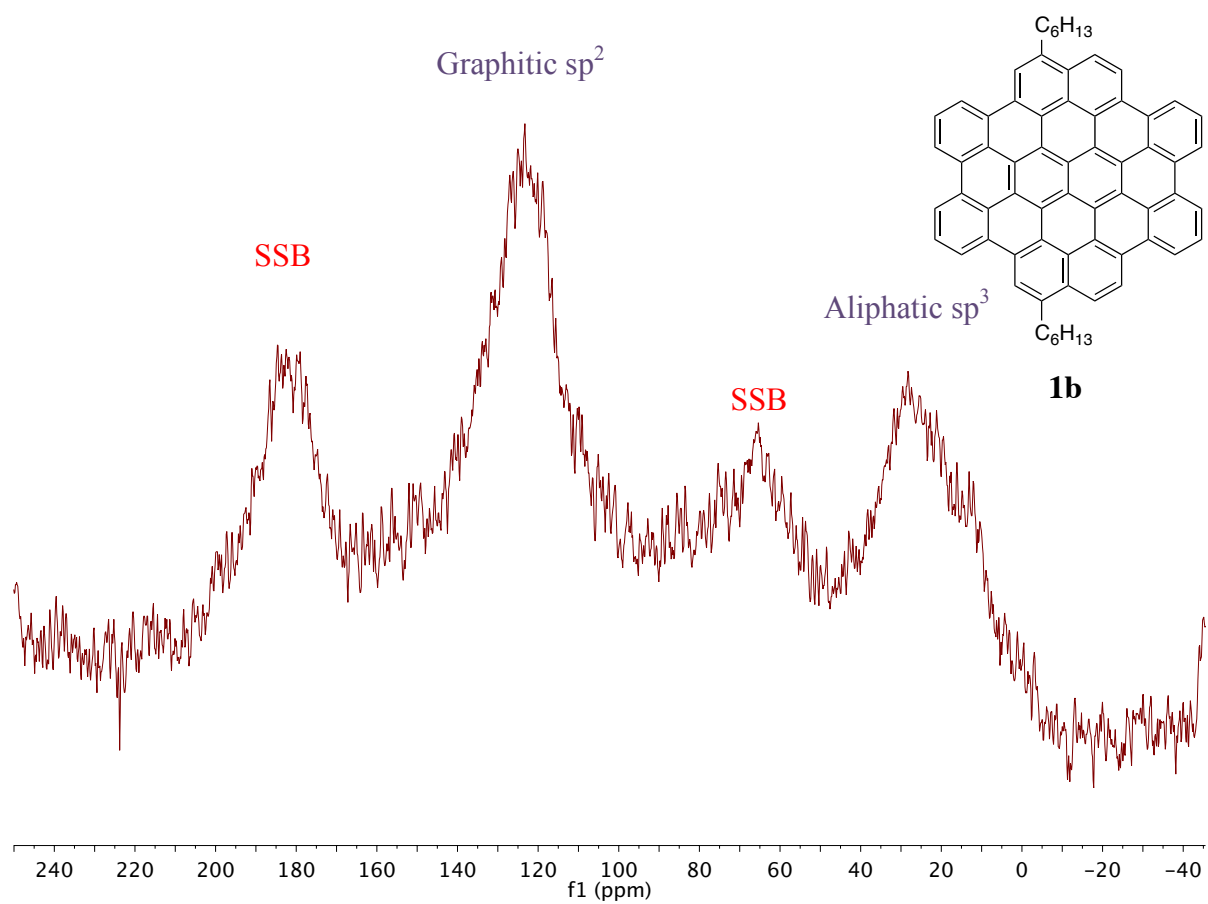

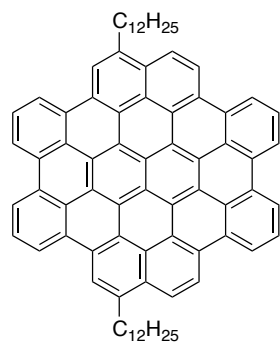

**1c**

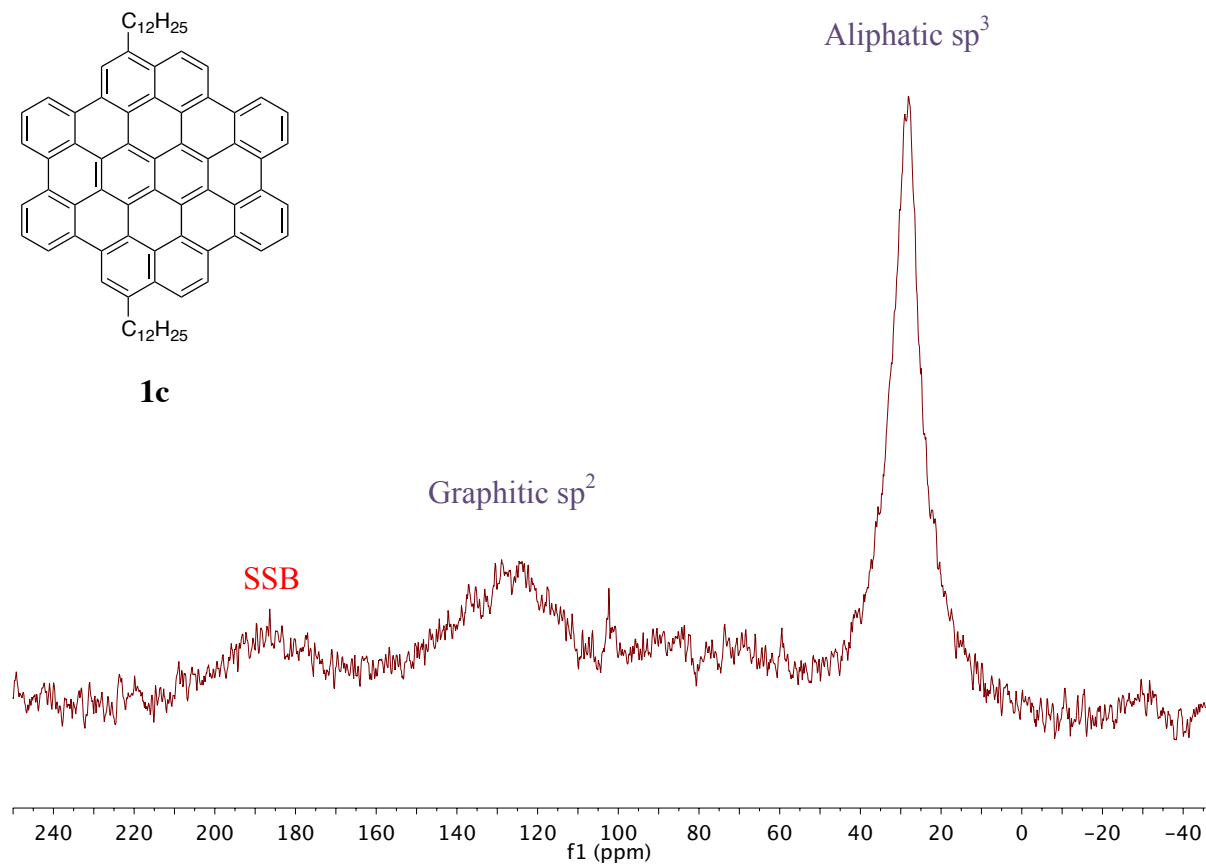

## 4. Mass Spectra

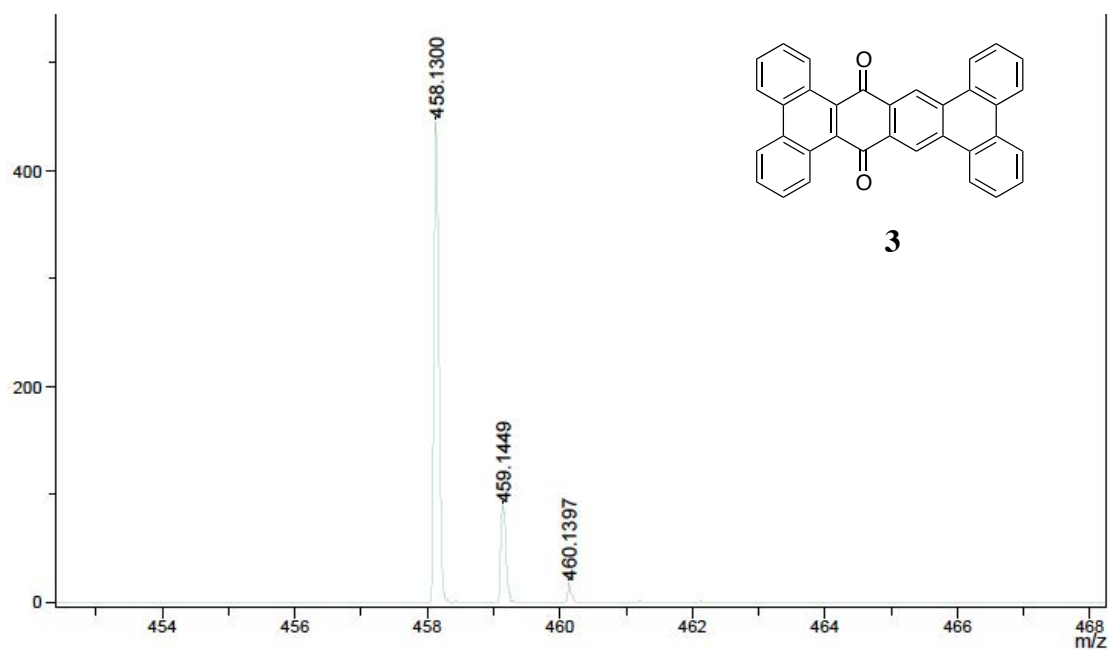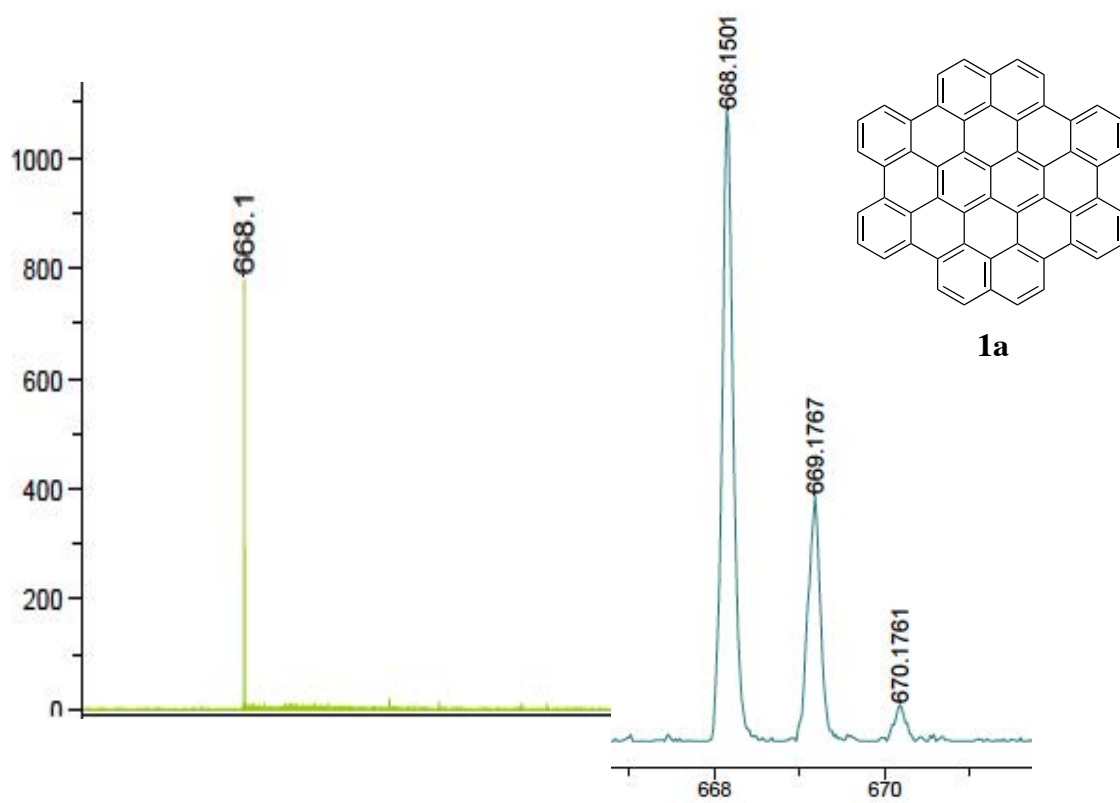

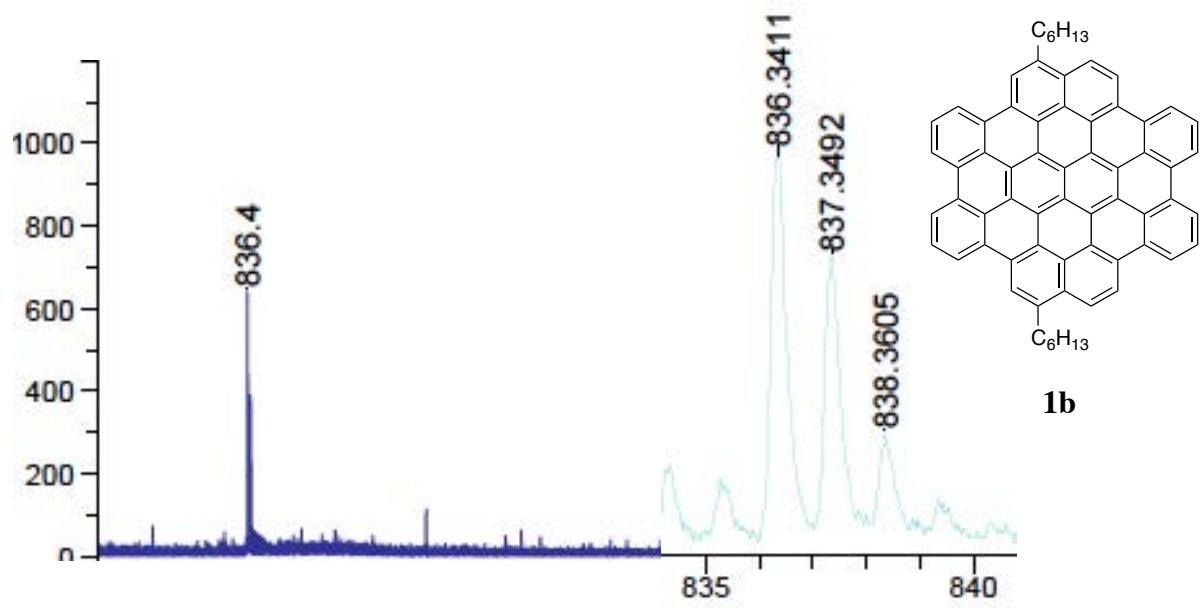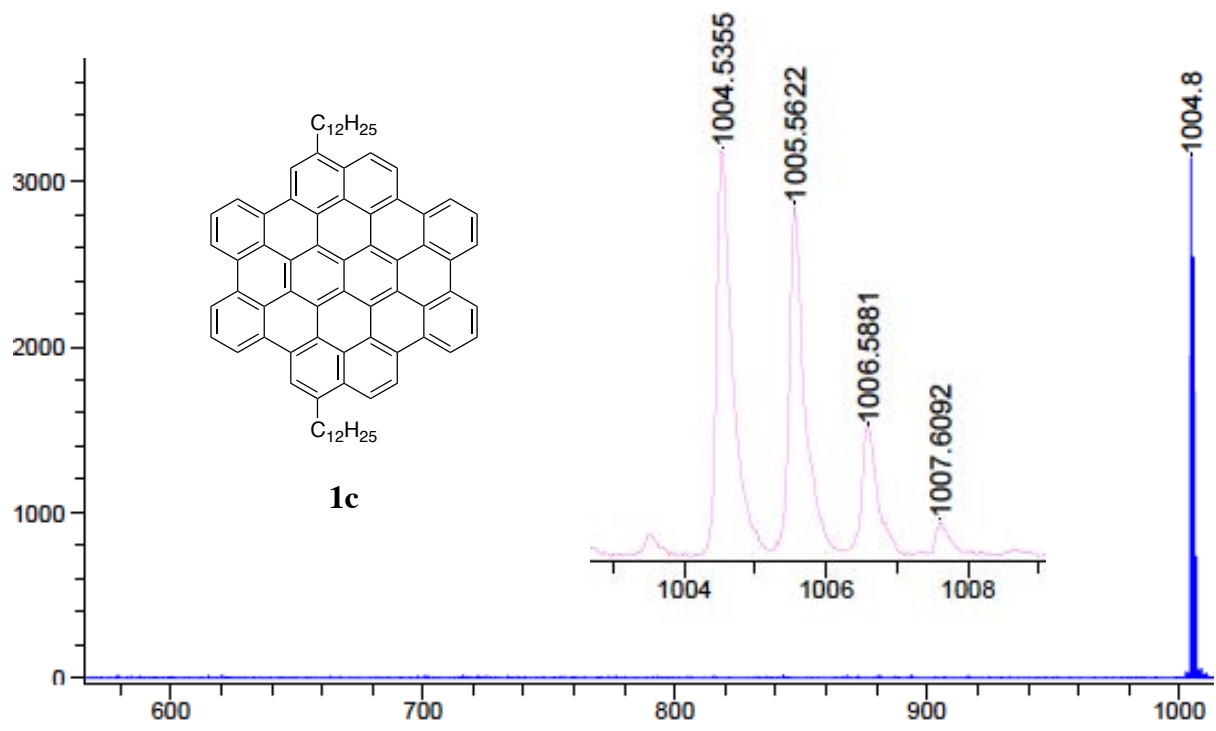

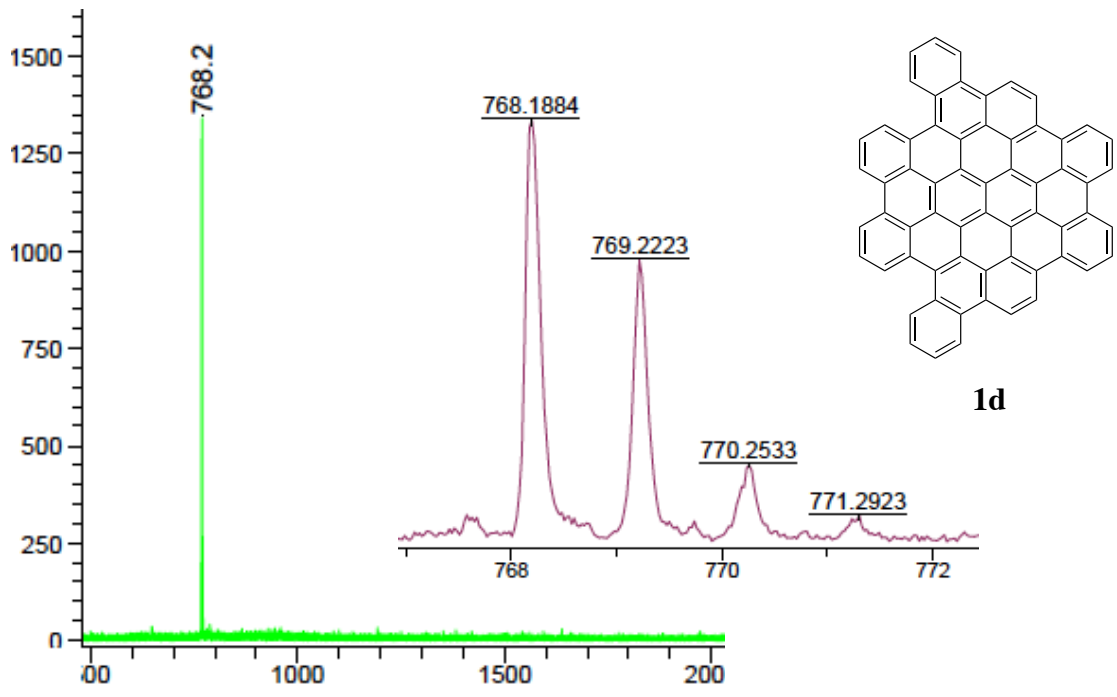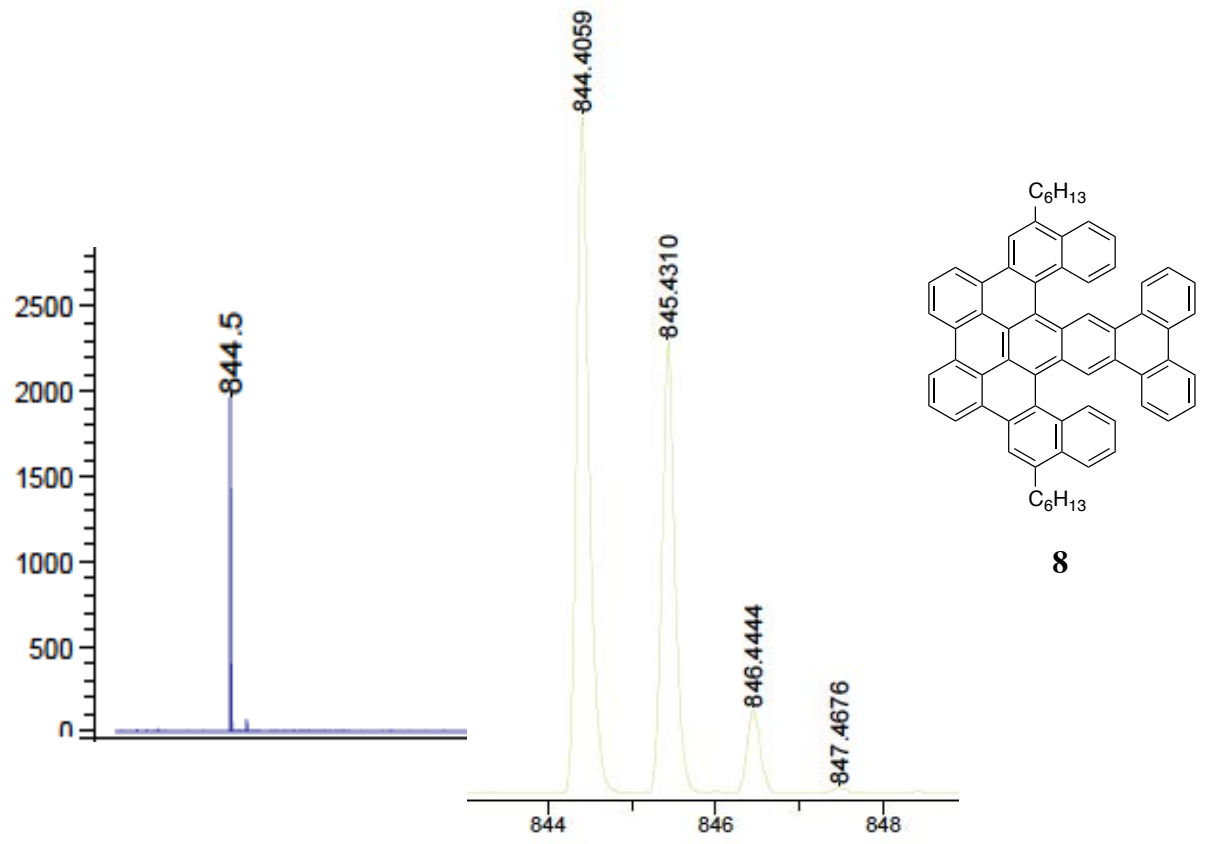

## 5. STM Studies and ESQC Calculations

The synthesized molecules of **1a** were deposited via sublimation on a gold Au(111) monocrystal substrate to be imaged and identified using a low temperature ultra-high vacuum scanning tunneling microscope (LT-UHV-STM).

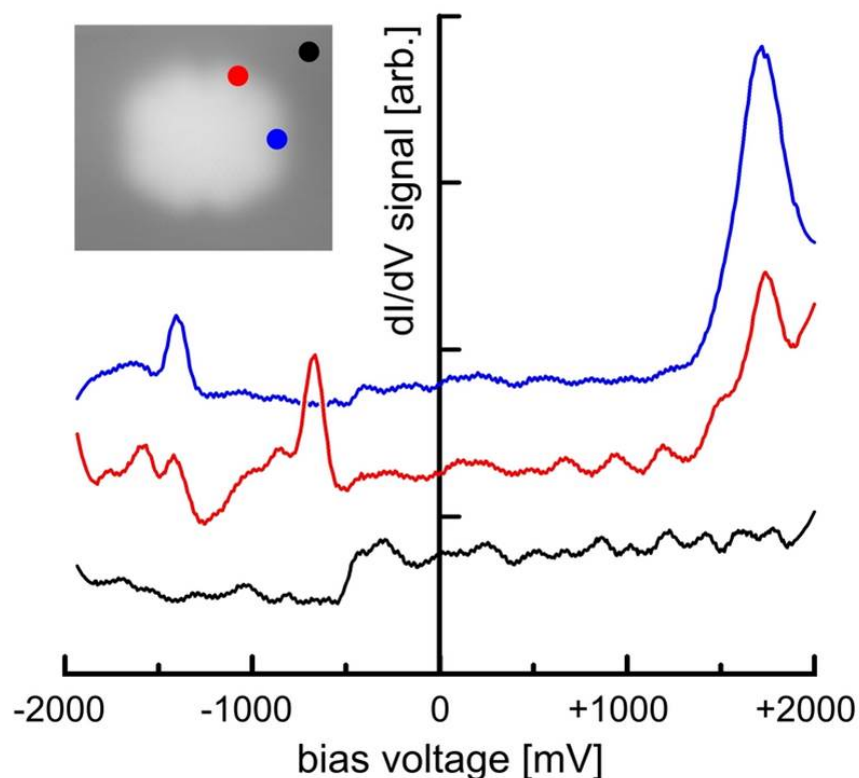

**Figure S1:** LT-UHV-STM  $dI/dV$  characteristic spectra recorded on a single molecule of **1a**, at places on the molecule indicated by red and blue solid dots. The spectra taken from **1a** zigzag edges show only one peak that corresponds to the molecule ground state (HOMO), while the spectra taken on the armchair edges show two peaks that correspond to the molecule's HOMO-1 and first excited state (LUMO). The spectrum in black taken from the Au(111) bare metal shows the characteristic resonance corresponding to the Au(111) surface state demonstrating that the STM tip was in conditions to be used to acquire  $dI/dV$  spectra.

Figure S1 shows a typical constant current STM image obtained in our experiments after the molecules sublimation on the Au(111) substrate. Single molecules of **1a** could be identified on the substrate terraces.  $dI/dV$  tunneling spectra were taken by positioning the STM tip over a single molecule of **1a** to track and measure the low lying electronic states characteristics of this compound. Although spectra were taken at different locations covering the whole molecule only spectra taken from the molecule edge's presented tunneling resonances, while spectra from the molecule center are featureless. The spectra from armchair edges show two distinctive resonances, one at each voltage polarity. Spectra from zigzag edges show only one resonance.

For those experiments, the Au(111) surface was intentionally selected to analyze the synthesized molecules because it has been already demonstrated that planar polyaromatic molecules like pentacene, coronene and others are physisorbed upon deposition on Au(111). Due to their adsorption state, the weak electronic coupling in between the molecules and Au(111) surface precludes the intermixing of molecular electronic states and the metal substrate states hence facilitating the identification of molecular electronic states whose spatial electronic distribution can be imaged in real space using the dI/dV mapping technique.

Molecules **1a** were imaged using a constant height dI/dV imaging mode to map the spatial distribution of the molecule's electronic states at -0.750 and 1.650 V, i.e. at the bias voltages corresponding to the two resonances nearest to the substrate's Fermi level. Characteristic STM topographic images taken concurrently with the dI/dV maps show slightly different features reflecting the fact that at these polarities, occupied and unoccupied states with various symmetries are captured during the imaging process. That is clearly visualized in the corresponding dI/dV maps: at -0.750 V the molecule's differential conductance map is made of four peripheral lobes, while the dI/dV map taken at 1.650 V shows six outer lobes. In both dI/dV maps intramolecular features are absent.

The ESQC calculated dI/dV STM images were calculated at the energies corresponding to the two resonances in the tunneling electron transmission of the tunnel junction, corresponding to electronic states nearest to the substrate's Fermi level. The calculations include all the elements of a tunneling junction made of the gold substrate, metal tip and one single molecule of **1a** trapped within the junction. These two resonances correspond respectively to the Highest Occupied and Lowest Unoccupied Molecular Orbitals, i.e. HOMO AND LUMO, in this mono-electronic approximation. The calculated and experimental images show identical nodal features enabling the molecule's identification indicating that effectively the synthesized and deposited molecules are tetrabenzocircumpirene **1a**. Therefore, the experimental dI/dV maps and the resonances they arise from correspond to **1a** HOMO and LUMO.



## 6. Structures Optimized by DFT Calculations

Calculations were carried out with DFT using the B3LYP functional as implemented in Gaussian 09.<sup>3</sup> The 6-31G(d) basis set<sup>4</sup> was used for all atoms. Frequency calculations were performed to characterize the stationary points as minima.

### 6.1. Tetrabenzocircumpylene (1a)

---

| Element | X           | Y           | Z           |
|---------|-------------|-------------|-------------|
| C       | 4.95889600  | 0.73232400  | 0.00042800  |
| C       | 3.71771600  | 1.43765100  | 0.00020900  |
| C       | 2.47052600  | 0.71644700  | 0.00009800  |
| C       | 2.47052600  | -0.71645000 | 0.00007900  |
| C       | 3.71771600  | -1.43765400 | 0.00023000  |
| C       | 4.95889600  | -0.73232600 | 0.00051300  |
| C       | 1.24313800  | 1.42209300  | -0.00001200 |
| C       | 1.24313700  | -1.42209500 | -0.00003600 |
| C       | -0.00003800 | -0.71222300 | -0.00002600 |
| C       | -0.00003800 | 0.71222300  | -0.00002300 |
| C       | -1.24314900 | 1.42210500  | -0.00006900 |
| C       | -2.47050500 | 0.71641500  | 0.00002300  |
| C       | -2.47050600 | -0.71641400 | 0.00006900  |
| C       | -1.24315000 | -1.42210400 | -0.00002200 |
| C       | -3.71777300 | -1.43759800 | 0.00031100  |

---

<sup>3</sup> M. J. Frisch, G. W. Trucks, H. B. Schlegel, G. E. Scuseria, M. A. Robb, J. R. Cheeseman, G. Scalmani, V. Barone, B. Mennucci, G. A. Petersson, H. Nakatsuji, M. Caricato, X. Li, H. P. Hratchian, A. F. Izmaylov, J. Bloino, G. Zheng, J. L. Sonnenberg, M. Hada, M. Ehara, K. Toyota, R. Fukuda, J. Hasegawa, M. Ishida, T. Nakajima, Y. Honda, O. Kitao, H. Nakai, T. Vreven, J. A. Montgomery, Jr., J. E. Peralta, F. Ogliaro, M. Bearpark, J. J. Heyd, E. Brothers, K. N. Kudin, K. N. Staroverov, R. Kobayashi, J. Normand, K. Raghavachari, A. Rendell, J. C. Burant, S. S. Iyengar, J. Tomasi, M. Cossi, N. Rega, N. J. Millam, M. Klene, J. E. Knox, J. B. Cross, V. Bakken, C. Adamo, J. Jaramillo, R. Gomperts, R. E. Stratmann, O. Yazyev, A. J. Austin, R. Cammi, C. Pomelli, J. W. Ochterski, R. L. Martin, K. Morokuma, V. G. Zakrzewski, G. A. Voth, P. Salvador, J. J. Dannenberg, S. Dapprich, A. D. Daniels, O. Farkas, J. B. Foresman, J. V. Ortiz, J. Cioslowski, D. J. Fox, Gaussian 09, revision 02; Gaussian, Inc.: Wallingford, CT, 2009.

<sup>4</sup> (a) M. M. Francl, W. J. Pietro, W. J. Hehre, J. S. Binkley, M. S. Gordon, D. J. Defrees, J. A. Pople, *J. Chem. Phys.* **1982**, *77*, 3654–3665. (b) W. J. Hehre, R. Ditchfield, J. A. Pople, *J. Chem. Phys.* **1972**, *56*, 2257–2261.

|   |             |             |             |
|---|-------------|-------------|-------------|
| C | -4.95900100 | -0.73236800 | 0.00059100  |
| C | -3.71777300 | 1.43760000  | 0.00000000  |
| C | -4.95900100 | 0.73237100  | 0.00017800  |
| C | 6.15332000  | -1.46021700 | 0.00086600  |
| C | 6.15147200  | -2.85180800 | 0.00093500  |
| H | 7.09329800  | -3.39349600 | 0.00128300  |
| C | 4.95465100  | -3.54495200 | 0.00057400  |
| H | 4.98522000  | -4.62699000 | 0.00070700  |
| C | 3.72124500  | -2.86546900 | 0.00015800  |
| C | 6.15332100  | 1.46021500  | 0.00053600  |
| C | 6.15147200  | 2.85180600  | 0.00047100  |
| H | 7.09329800  | 3.39349500  | 0.00057800  |
| C | 4.95465100  | 3.54495000  | 0.00027000  |
| H | 4.98521800  | 4.62698800  | 0.00025400  |
| C | 3.72124600  | 2.86546600  | 0.00011200  |
| C | -3.72119100 | -2.86537300 | 0.00039200  |
| C | -4.95444300 | -3.54508900 | 0.00106200  |
| H | -4.98475100 | -4.62714100 | 0.00134700  |
| C | -6.15134500 | -2.85209700 | 0.00154400  |
| H | -7.09309300 | -3.39391600 | 0.00215100  |
| C | -3.72119000 | 2.86537500  | -0.00024900 |
| C | -4.95444100 | 3.54509200  | -0.00039000 |
| H | -4.98475000 | 4.62714400  | -0.00056000 |
| C | -6.15333300 | 1.46050500  | -0.00008400 |
| C | -6.15134400 | 2.85210100  | -0.00035300 |
| H | -7.09309200 | 3.39392000  | -0.00053900 |
| H | 7.10837300  | -0.94994000 | 0.00113900  |
| H | 7.10837300  | 0.94993800  | 0.00066700  |
| H | -7.10843800 | 0.95037300  | -0.00014800 |
| C | 2.41911300  | 5.00470000  | -0.00039100 |
| C | 1.23356300  | 5.68647600  | -0.00057200 |

|   |             |             |             |
|---|-------------|-------------|-------------|
| C | -0.00006100 | 4.99274900  | -0.00050300 |
| C | -0.00000400 | 3.56982700  | -0.00028700 |
| C | 1.24326900  | 2.86285200  | -0.00013000 |
| C | 2.46077300  | 3.58363500  | -0.00013600 |
| H | -1.22481500 | 6.77363400  | -0.00084900 |
| H | 3.33956600  | 5.57455000  | -0.00047800 |
| C | -1.23368900 | 5.68656600  | -0.00066700 |
| C | -1.24324400 | 2.86289300  | -0.00022500 |
| C | -2.46075200 | 3.58355500  | -0.00035900 |
| C | -2.41916200 | 5.00454100  | -0.00059600 |
| H | -3.33965600 | 5.57440600  | -0.00073200 |
| C | 2.46077100  | -3.58363800 | -0.00030100 |
| C | 1.24326700  | -2.86285400 | -0.00024900 |
| C | -0.00000700 | -3.56982700 | -0.00044300 |
| C | -0.00006600 | -4.99275000 | -0.00085200 |
| C | 1.23355700  | -5.68647800 | -0.00111200 |
| C | 2.41910800  | -5.00470300 | -0.00083000 |
| C | -1.24324600 | -2.86289300 | -0.00019600 |
| C | -1.23369400 | -5.68656500 | -0.00105700 |
| H | 3.33956000  | -5.57455500 | -0.00110100 |
| C | -2.41916700 | -5.00453900 | -0.00070400 |
| C | -2.46075500 | -3.58355300 | -0.00016100 |
| H | -1.22482100 | -6.77363300 | -0.00149900 |
| H | -3.33966100 | -5.57440300 | -0.00095600 |
| C | -6.15333400 | -1.46050200 | 0.00127100  |
| H | -7.10843900 | -0.95036900 | 0.00170500  |
| H | 1.22446700  | 6.77362500  | -0.00077400 |
| H | 1.22446000  | -6.77362700 | -0.00153400 |

---

## 6.2. Hexabenzocoronene (HBC)

---

| Element | X           | Y           | Z           |
|---------|-------------|-------------|-------------|
| C       | 5.13582800  | 0.06366500  | -0.00017700 |
| C       | 3.77460800  | 0.40259300  | -0.00006100 |
| C       | 3.34263000  | 1.79857000  | -0.00002500 |
| C       | 4.27483400  | 2.84678100  | -0.00013200 |
| C       | 2.80014000  | -0.63674000 | 0.00004900  |
| C       | 1.95157600  | 2.10631200  | 0.00012900  |
| C       | 0.96751700  | 1.04430600  | 0.00010200  |
| C       | 1.38831200  | -0.31571300 | 0.00007900  |
| C       | 0.42062100  | -1.36016700 | 0.00007100  |
| C       | -0.96760100 | -1.04445100 | -0.00005500 |
| C       | -1.38846300 | 0.31578100  | -0.00009800 |
| C       | -0.42083900 | 1.36009700  | 0.00003800  |
| C       | -2.80028200 | 0.63685500  | -0.00043000 |
| C       | -3.77477200 | -0.40262500 | -0.00080700 |
| C       | -1.95162800 | -2.10648800 | -0.00009500 |
| C       | -3.34278400 | -1.79863600 | -0.00036400 |
| C       | 3.86545600  | 4.17153700  | -0.00010300 |
| C       | 5.54609400  | -1.26083000 | -0.00019600 |
| C       | -3.22957200 | 1.99539500  | -0.00053500 |
| C       | -4.60377800 | 2.27798200  | -0.00138200 |
| H       | -4.95456800 | 3.30206100  | -0.00173800 |
| C       | -5.54632100 | 1.26079500  | -0.00196700 |
| H       | -6.60579100 | 1.50144900  | -0.00270400 |
| C       | -1.53865200 | -3.47008200 | 0.00016200  |
| C       | -2.51341900 | -4.47906200 | 0.00024400  |
| H       | -2.22509400 | -5.52248900 | 0.00042900  |
| C       | -4.27503700 | -2.84664400 | -0.00017100 |

|   |             |             |             |
|---|-------------|-------------|-------------|
| C | -3.86566800 | -4.17163000 | 0.00012600  |
| H | -4.60423200 | -4.96846600 | 0.00026900  |
| H | -5.33723300 | -2.63777100 | -0.00017700 |
| C | 2.62333400  | -4.41539500 | 0.00051200  |
| C | 2.23616500  | -3.06726800 | 0.00026900  |
| C | 3.22954500  | -1.99518200 | 0.00008800  |
| C | 4.60347700  | -2.27789300 | -0.00005000 |
| H | 2.00239000  | -6.47088800 | 0.00085900  |
| C | 1.68116100  | -5.43300800 | 0.00066000  |
| C | 0.84865100  | -2.74323900 | 0.00020200  |
| C | -0.11348100 | -3.79417700 | 0.00031800  |
| C | 0.32897400  | -5.12541400 | 0.00055600  |
| H | -0.38230700 | -5.94147600 | 0.00067400  |
| C | 2.51321400  | 4.47882100  | 0.00015100  |
| C | 1.53874900  | 3.46988900  | 0.00029100  |
| C | 0.11360300  | 3.79407300  | 0.00055900  |
| C | -0.32829700 | 5.12529500  | 0.00115000  |
| C | -0.84868800 | 2.74322600  | 0.00022300  |
| C | -1.68049700 | 5.43321200  | 0.00135200  |
| C | -2.62284200 | 4.41587200  | 0.00084100  |
| C | -2.23612000 | 3.06741900  | 0.00017800  |
| H | -2.00120400 | 6.47125300  | 0.00191600  |
| H | -3.67068300 | 4.68738100  | 0.00109000  |
| C | -5.13592400 | -0.06388800 | -0.00162800 |
| H | -5.89474000 | -0.83598600 | -0.00214100 |
| H | 3.67128300  | -4.68672200 | 0.00061200  |
| H | 4.95437700  | -3.30197600 | -0.00007500 |
| H | 6.60542300  | -1.50188800 | -0.00031300 |
| H | 5.89464700  | 0.83570100  | -0.00027000 |
| H | 5.33699600  | 2.63796300  | -0.00030500 |
| H | 4.60366800  | 4.96862900  | -0.00025700 |

|   |            |            |            |
|---|------------|------------|------------|
| H | 2.22497100 | 5.52229800 | 0.00014500 |
| H | 0.38315500 | 5.94125400 | 0.00156000 |
